# Supplementary material for: Syntheses of arabinose-derived pyrrolidine catalysts and their applications in intramolecular Diels–Alder reactions
Source: Royal Society of Chemistry journal article supplement (doi:10.1039/c4ob02219j), 2014-11-27

## Supporting Information (SI)

### Syntheses of Arabinose Derived Pyrrolidine Catalysts and Their Applications in Intramolecular Diels-Alder Reactions

Tony K. M. Shing \*, Kwun W. Wu, Ho T. Wu, Qicai Xiao

*Department of Chemistry and Center of Novel Functional Molecules, The Chinese University of Hong Kong, Shatin,  
Hong Kong, China*

\*Email: [tonyshing@cuhk.edu.hk](mailto:tonyshing@cuhk.edu.hk)

#### Table of contents

|                               |       |
|-------------------------------|-------|
| Synthesis of Dienal <b>28</b> | 2–3   |
| Synthesis of Dienal <b>31</b> | 4–5   |
| NMR spectra                   | 6–59  |
| HPLC chromatograms            | 60–61 |

## Preparation of Dienal **28**

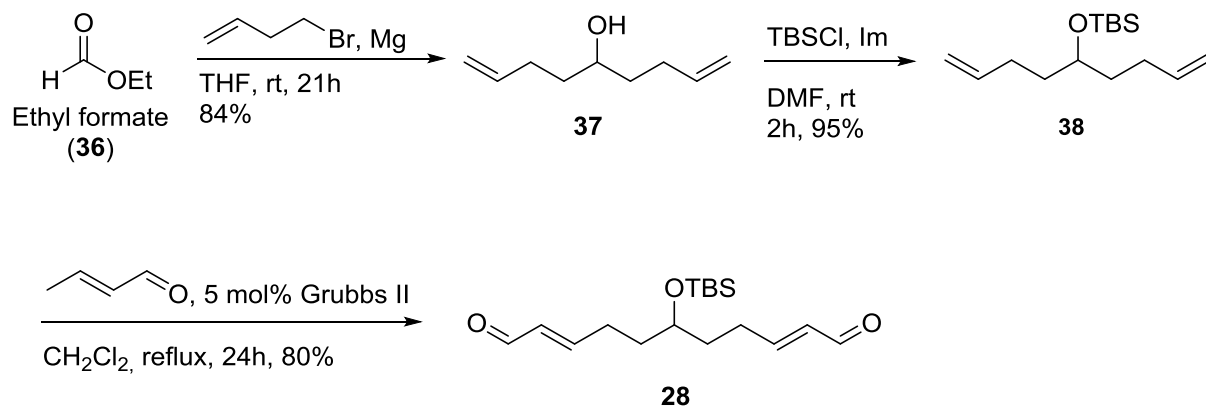

**Homoallylic alcohol 37.** To a suspension of magnesium powder (1.35 g, 55.7 mmol) in THF (15 mL) was added 1,2-dibromoethane (0.03 mL, 0.309 mmol) and the mixture was stirred at room temperature for 15 min. A solution of butenyl bromide (1.9 mL, 18.6 mmol) was added dropwise to the mixture at a rate to maintain a gentle reflux of the THF. After the addition of the butenyl bromide solution, the mixture was heated under reflux for 2 h. Then the reaction mixture was cooled down to 0 °C and a solution of ethyl formate **36** (0.25 mL, 3.09 mmol) was added and stirring was continued for 21 h. Saturated NH<sub>4</sub>Cl solution (10 mL) was added to the reaction mixture at 0 °C. The reaction mixture was extracted with EtOAc (4 × 100 mL). The combined organic extracts were dried over MgSO<sub>4</sub> and filtered. The filtrate was concentrated under reduced pressure and the residue was purified by flash column chromatography (hexane:Et<sub>2</sub>O, 3:1) to afford alcohol **37** (366 mg, 84%) as a colorless oil: *R<sub>f</sub>* 0.33 (hexane:Et<sub>2</sub>O, 1:1); IR (thin film) 3526, 3339, 3077, 2928, 2851, 1697, 1643, 1451, 910 cm<sup>-1</sup>; <sup>1</sup>H NMR δ 1.46–1.55 (4H, m), 1.98 (1H, br s), 2.06–2.21 (4H, m), 3.59–3.62 (1H, m), 4.94 (2H, ddt, *J* = 1.3, 3.2, 10.2 Hz), 5.01 (2H, ddt, *J* = 1.6, 3.5, 17.1 Hz), 5.75–5.86 (2H, m); <sup>13</sup>C NMR δ 30.0 (CH<sub>2</sub>), 36.4 (CH<sub>2</sub>), 70.8 (CH), 114.7 (CH<sub>2</sub>), 138.5 (CH); MS (ESI) *m/z* (relative intensity) 141 ([M+H]<sup>+</sup> 100); HRMS (ESI) calcd for C<sub>9</sub>H<sub>16</sub>O [M+H]<sup>+</sup> 141.1274, found 141.1274.

**Silyl ether 38.** A solution of the alcohol **37** (53.0 mg, 0.378 mmol), imidazole (206 mg, 3.02 mmol) and *tert*-butyl dimethyl silyl chloride (TBDMSCl) (228 mg, 1.51 mmol) in dry DMF (0.5 mL) was stirred at room temperature for 2 h. The mixture was quenched with saturated NaHCO<sub>3</sub> (30 mL) solution and the aqueous phase was extracted with CH<sub>2</sub>Cl<sub>2</sub> (3 × 100 mL). The combined organic extracts were washed with brine, dried over anhydrous MgSO<sub>4</sub>, and filtered. The filtrate was concentrated under reduced

pressure and the residue was purified by flash chromatography (hexane) to afford silyl ether **38** (91.1 g, 95%) as a colorless oil:  $R_f$  0.50 (hexane:CH<sub>2</sub>Cl<sub>2</sub>, 1:8); IR (thin film) 3338, 3113, 2930, 2707, 1697, 1517, 834 cm<sup>-1</sup>; <sup>1</sup>H NMR  $\delta$  0.06 (6H, s), 0.90 (9H, s), 1.51–1.57 (4H, m), 2.04–2.17 (4H, m), 3.68–3.73 (1H, m), 4.93–4.96 (2H, m), 4.99–5.04 (2H, m), 5.77–5.87 (2H, m); <sup>13</sup>C NMR  $\delta$  -4.33 (CH<sub>3</sub>), 18.2 (C), 26.0 (CH<sub>3</sub>), 29.6 (CH<sub>2</sub>), 36.3 (CH<sub>2</sub>), 71.3 (CH), 114.3 (CH<sub>2</sub>), 139.0 (CH); MS (ESI)  $m/z$  (relative intensity) 255 ([M+H]<sup>+</sup>, 100); HRMS (ESI) calcd for C<sub>15</sub>H<sub>30</sub>OSi [M+H]<sup>+</sup> 255.2139, found 255.2134.

**Dienal 28.** To a solution of the silyl ether **38** (92.3 mg, 0.363 mmol) in a dry CH<sub>2</sub>Cl<sub>2</sub> (4 mL) was added crotonaldehyde (0.09 mL, 1.09 mmol) and 2<sup>nd</sup> generation Grubbs catalyst (15.4 mg, 0.0181 mmol). The resultant mixture was heated under reflux for 5 h. The reaction mixture was concentrated under reduced pressure and the crude residue was directly purified by flash chromatography (hexane :EtOAc, 3:1) to afford dienal **28** (90 mg, 80%) as a pale yellow oil:  $R_f$  0.33 (hexane :EtOAc, 3:1); IR (thin film) 2934, 2857, 2816, 2734, 1691, 1638, 1255, 1134, 1094, 975, 838, 777 cm<sup>-1</sup>; <sup>1</sup>H NMR  $\delta$  0.06 (6H, s), 0.89 (9H, s), 1.64–1.69 (4H, m), 2.31–2.45 (4H, m), 3.76–3.82 (1H, m), 6.12 (2H, ddt,  $J$  = 15.6, 7.84, 1.48 Hz), 6.86 (2H, dt,  $J$  = 15.6, 6.64 Hz), 9.51 (2H, d,  $J$  = 7.84 Hz); <sup>13</sup>C NMR  $\delta$  -4.41 (CH<sub>3</sub>), 18.0 (C), 25.8 (CH<sub>3</sub>), 28.3 (CH<sub>2</sub>), 34.8 (CH<sub>2</sub>), 70.5 (CH), 133.0 (CH), 158.2 (CH), 193.8 (CH); MS (ESI)  $m/z$  (relative intensity) 333 ([M+Na]<sup>+</sup>, 100); HRMS (ESI) calcd for C<sub>17</sub>H<sub>30</sub>O<sub>3</sub>Si [M+Na]<sup>+</sup> 333.1856, found 333.1857.

## Preparation of Dienal **31**

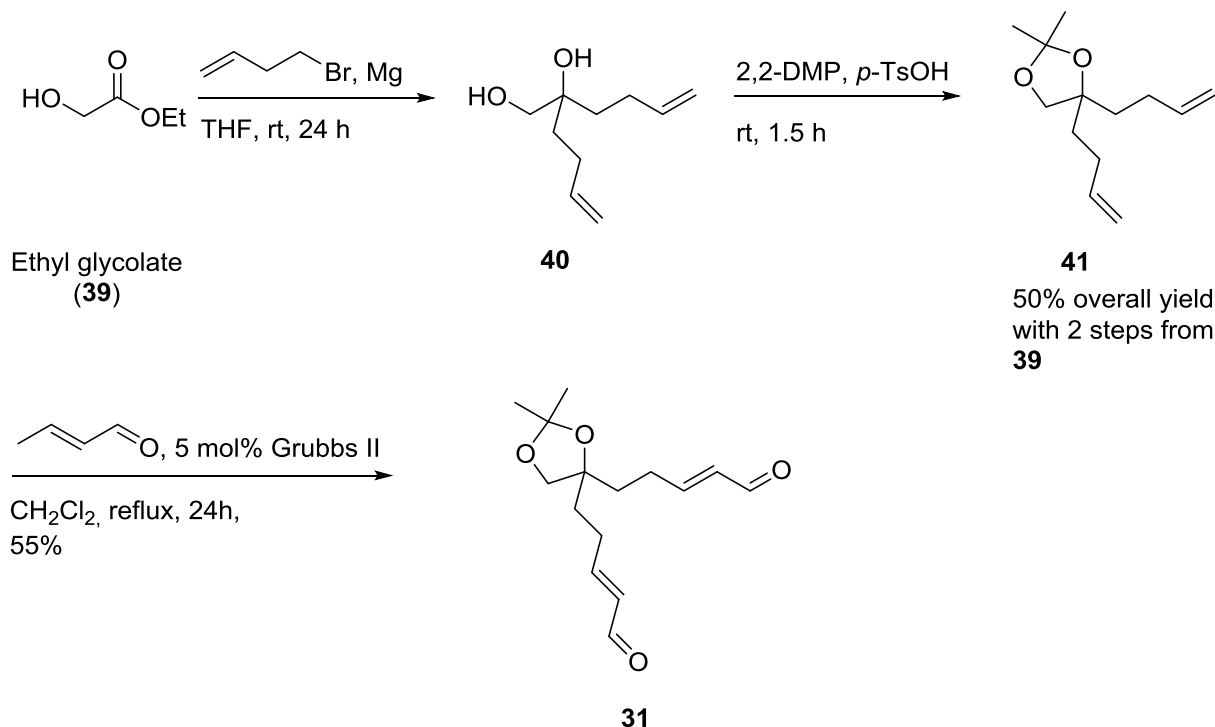

**Diol 40.** To a suspension of magnesium powder (3.85 g, 158 mmol) in THF (53 mL) was added 1,2-dibromoethane (0.05 mL, 0.528 mmol) and the mixture was stirred at room temperature for 15 min. A solution of butenyl bromide (5.40 mL, 52.8 mmol) was added dropwise to the mixture at a rate to maintain a gentle reflux of the THF. After the addition of the butenyl bromide solution, the mixture was heated under reflux for 2 h. Then the reaction mixture was cooled down to 0 °C and a solution of ethyl glycolate **39** (0.5 mL, 5.28 mmol) was added and stirring was continued for 24 h. Saturated  $\text{NH}_4\text{Cl}$  solution (10 mL) was added to the reaction mixture at 0 °C. The reaction mixture was extracted with EtOAc (4  $\times$  100 mL). The combined organic extracts were dried over  $\text{MgSO}_4$  and filtered. The filtrate was concentrated under reduced pressure and the residue was purified by flash column chromatography (hexane:EtOAc, 3:1) to afford diol **40** (629 mg, 70%) as a colorless oil:  $R_f$  0.37 (hexane:EtOAc, 1:1); IR (thin film) 3381, 3076, 2937, 2865, 1642, 1448, 1060, 998, 911  $\text{cm}^{-1}$ ;  $^1\text{H}$  NMR  $\delta$  1.55–1.60 (4H, m), 2.05–2.10 (4H, m), 2.33 (1H, br s), 2.54 (1H, br s), 3.46 (2H, s), 4.94–5.06 (4H, m), 5.77–5.87 (2H, m);  $^{13}\text{C}$  NMR  $\delta$  27.8 ( $\text{CH}_2$ ), 34.9 ( $\text{CH}_2$ ), 67.8 ( $\text{CH}_2$ ), 74.6 (C), 114.7 ( $\text{CH}_2$ ), 138.5 (CH); MS (ESI)  $m/z$  (relative intensity) 193 ( $[\text{M}+\text{Na}]^+$ , 100); HRMS (ESI) calcd for  $\text{C}_{10}\text{H}_{10}\text{O}_2$   $[\text{M}+\text{Na}]^+$  193.1199, found 193.1198.

**Diene 41.** 2,2-dimethoxypropane (16 mL, 132 mmol) and TsOH (90.9 mg, 0.528 mmol) were added to diol **40** (629 mg, 3.70 mmol) at room temperature. The resultant solution was stirred at room temperature for another 1.5 h. The reaction was quenched by dropwise addition of Et<sub>3</sub>N until pH~8 (test by pH paper). Concentration of the filtrate followed by flash chromatography (hexane:Et<sub>2</sub>O, 10:1) yielded diene **41** (552 mg, 71%) as a colorless oil: R<sub>f</sub> 0.33 (hexane:Et<sub>2</sub>O, 10:1); IR (thin film) 3076, 2984, 2938, 2865, 1642, 1450, 1373, 1251, 1212, 1062, 991, 870 cm<sup>-1</sup>; <sup>1</sup>H NMR δ 1.39 (6H, s), 1.59–1.74 (4H, m), 2.02–2.15 (4H, m), 3.76 (2H, s), 4.93–4.97 (2H, m), 5.00–5.06 (2H, m), 5.77–5.87 (2H, m); <sup>13</sup>C NMR δ 27.1 (CH<sub>3</sub>), 28.5 (CH<sub>2</sub>), 36.5 (CH<sub>2</sub>), 72.8 (CH<sub>2</sub>), 83.0 (C), 109.0 (C), 114.6 (CH<sub>2</sub>), 138.4 (CH); MS (ESI) *m/z* (relative intensity) 211 ([M+H]<sup>+</sup>, 100); HRMS (ESI) calcd for C<sub>13</sub>H<sub>22</sub>O<sub>2</sub> [M+H]<sup>+</sup> 211.1693, found 211.1694.

**Dienal 31.** To a solution of the diene **41** (100 mg, 0.475 mmol) in a dry CH<sub>2</sub>Cl<sub>2</sub> (6 mL) was added crotonaldehyde (0.12 mL, 1.43 mmol) and 2<sup>nd</sup> generation Grubbs catalyst (20.2 mg, 0.00238 mmol). The resultant mixture was heated under reflux for 24 h. The reaction mixture was concentrated under reduced pressure and the crude residue was directly purified by flash chromatography (hexane:EtOAc, 1:1) to afford dienal **31** (69.4 mg, 55%) as a pale yellow oil: R<sub>f</sub> 0.20 (hexane:EtOAc, 2:1); IR (thin film) 2986, 2936, 2867, 2818, 2734, 1688, 1639, 1374, 1057, 978, 871 cm<sup>-1</sup>; <sup>1</sup>H NMR δ 1.40 (6H, s), 1.78 (4H, t, *J* = 8.3 Hz), 2.32–2.50 (4H, m), 3.82 (2H, s), 6.14 (2H, ddt, *J* = 15.6, 7.8, 1.4 Hz), 6.86 (2H, dt, *J* = 15.6, 6.6 Hz), 9.51 (2H, d, *J* = 7.8 Hz); <sup>13</sup>C NMR δ 27.0 (CH<sub>3</sub>), 27.4 (CH<sub>2</sub>), 35.4 (CH<sub>2</sub>), 72.4 (CH<sub>2</sub>), 82.0 (C), 109.8 (C), 133.1 (CH), 157.4 (CH), 193.8 (CH); MS (ESI) *m/z* (relative intensity) 289 ([M+Na]<sup>+</sup>, 100); HRMS (ESI) calcd for C<sub>15</sub>H<sub>22</sub>O<sub>4</sub> [M+Na]<sup>+</sup> 289.1410, found 289.1407.

# <sup>1</sup>H NMR

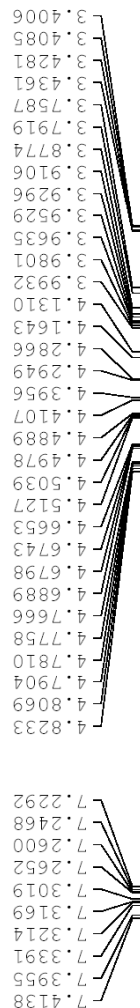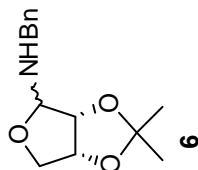

NAME WKWD30\_cdcl3  
 EXPNO 1  
 PROCNO 1  
 Date\_ 20110506  
 Time\_ 14.02  
 INSTRUM spect  
 PROBHD 5 mm PADUL 13C  
 PULPROG zg30  
 TD 65536  
 SOLVENT CDCl3  
 NS 4  
 DS 2  
 SWH 8223.685 Hz  
 FIDRES 0.125483 Hz  
 AQ 3.9846387 sec  
 RG 32  
 DW 60.800 usec  
 DE 6.50 usec  
 TE 294.3 K  
 D1 1.00000000 sec  
 TDO 1  
 CHANNEL f1  
 NUC1 1H  
 P1 14.83 usec  
 PL 0.00 dB  
 FL1 8.31434441 W  
 SFOL 400.1324710 MHz  
 SI 32768  
 SF 400.1300096 MHz  
 WDW EM  
 SSB 0  
 LB 0.30 Hz  
 GB 0  
 PC 1.00

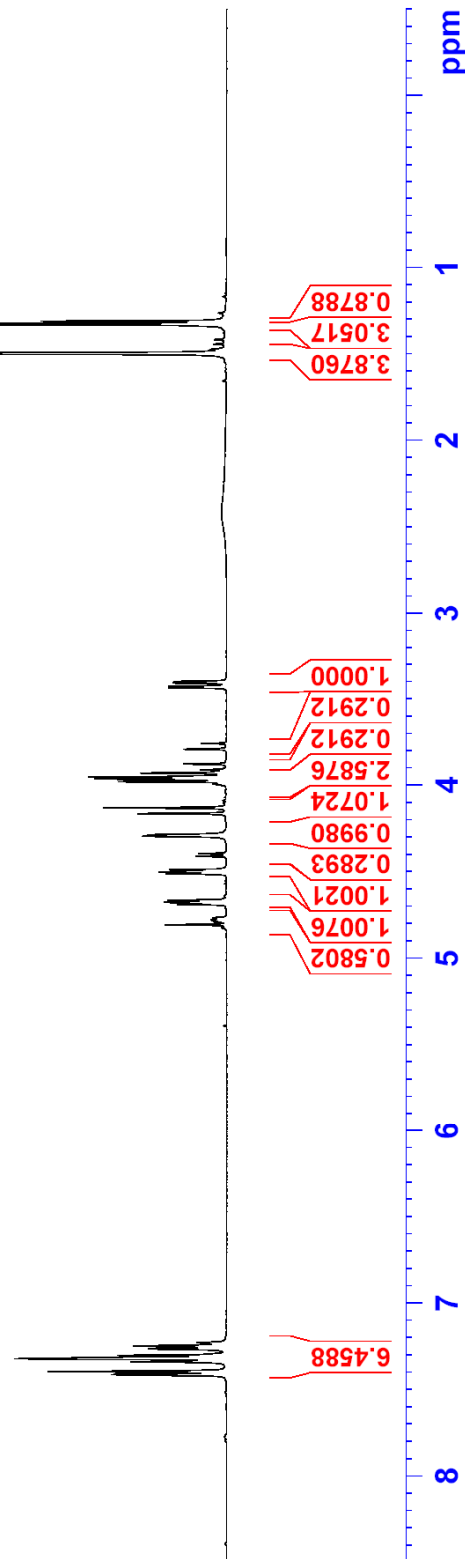

# <sup>13</sup>C NMR

139.87  
139.60  
128.38  
128.25  
128.18  
128.16  
112.33  
111.94  
94.37  
91.35  
85.20  
80.47  
79.84  
79.19  
77.37  
77.06  
76.74  
70.54  
68.74  
50.10  
49.20  
26.30  
25.95  
24.77  
24.55

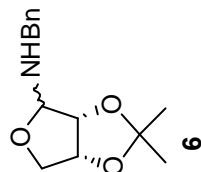

NAME WKWD30\_cdcl3\_c13  
EXPNO 1  
PROCNO 1  
Date\_ 20110506  
Time\_ 14.09  
INSTRUM spect  
PROBHD 5 mm PABUL 13C  
PULPROG zgpg30  
TD 65536  
SOLVENT CDCl3  
NS 955  
DS 4  
SWH 24038.461 Hz  
FIDRES 0.366798 Hz  
AQ 1.3631988 sec  
RG 203  
DW 20.800 usec  
DE 6.50 usec  
TE 294.8 K  
D1 2.00000000 sec  
D11 0.03000000 sec  
TD0 1  
===== CHANNEL f1 =====  
NUC1 13C  
P1 9.68 usec  
PL1 -0.60 dB  
PL1W 41.24164963 W  
SFO1 100.6228298 MHz  
===== CHANNEL f2 =====  
CPDPRG2 waltz16  
NUC2 1H  
PCPD2 90.00 usec  
PL2 0.00 dB  
PL12 15.66 dB  
PL13 15.92 dB  
PL2W 8.31434441 W  
PL12W 0.22585411 W  
PL13W 0.21272963 W  
SFO2 400.1316005 MHz  
SI 32768  
SF 100.6127778 MHz  
WDW EM  
SSB 0  
LB 1.00 Hz  
GB 0  
PC 1.40

200 180 160 140 120 100 80 60 40 20 0 ppm

# <sup>1</sup>H NMR

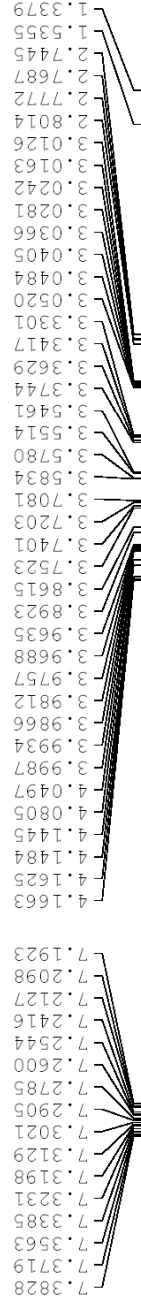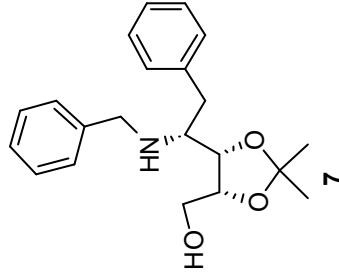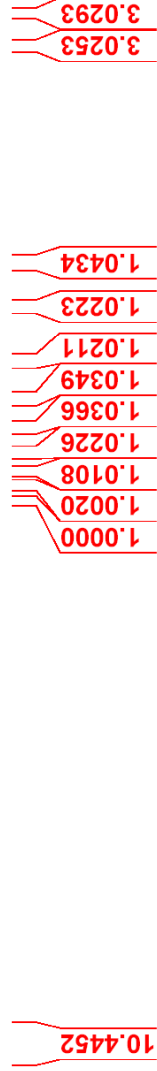

NAME WKWD31  
EXPNO 1  
PROCNO 1  
Date\_ 20100826  
Time 20.24  
INSTRUM spect  
PROBHD 5 mm PABBO BB-  
PULPROG zg30  
TD 65536  
SOLVENT CDCl3  
NS 4  
DS 2  
SWH 8223.685 Hz  
FIDRES 0.125483 Hz  
AQ 3.9846387 sec  
RG 32  
DW 60.800 usec  
DE 6.50 usec  
TE 298.7 K  
D1 1.00000000 sec  
TD0 1

===== CHANNEL f1 =====  
NUC1 1H  
P1 14.00 usec  
PL1 -1.00 dB  
PL1W 13.56617069 W  
SFO1 400.1924713 MHz  
SI 32768  
SF 400.1900070 MHz  
WDW EM  
SSB 0  
LB 0.30 Hz  
GB 0  
PC 1.00



# <sup>13</sup>C NMR

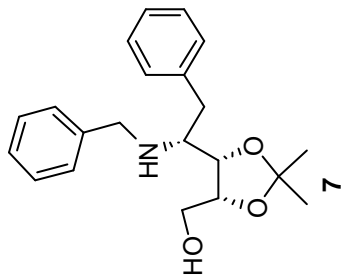

138.62  
138.13  
129.26  
128.70  
128.68  
128.64  
127.57  
126.50  
107.51  
77.73  
77.38  
77.06  
76.74  
76.31  
60.56  
56.50  
50.55  
37.32  
26.68  
24.72

NAME WKWD31\_c13\_1  
EXPNO 1  
PROCNO 2  
Date\_ 20100827  
Time\_ 11.04  
INSTRUM spect  
PROBHD 5 mm PABBI 1H/  
PULPROG zgpg30  
TD 65536  
SOLVENT CDCl3  
NS 263  
DS 4  
SWH 24038.461 Hz  
FIDRES 0.366798 Hz  
AQ 1.3631988 sec  
RG 203  
DW 20.800 usec  
DE 6.50 usec  
TE 294.6 K  
D1 2.00000000 sec  
D11 0.03000000 sec  
TD0 1

===== CHANNEL f1 =====  
NUC1 13C  
P1 14.50 usec  
PL1 -4.00 dB  
PL1W 90.22689819 W  
SFO1 100.6228298 MHz

===== CHANNEL f2 =====  
CPDPRG2 waltz16  
NUC2 1H  
PCPD2 80.00 usec  
PL2 -2.00 dB  
PL12 18.80 dB  
PL13 18.80 dB  
PL2W 13.17734718 W  
PL12W 0.10960442 W  
PL13W 0.10960442 W  
SFO2 400.1316005 MHz  
SI 32768  
SF 100.6127749 MHz  
WDW EM  
SSB 0  
LB 1.00 Hz  
GB 0  
PC 1.40

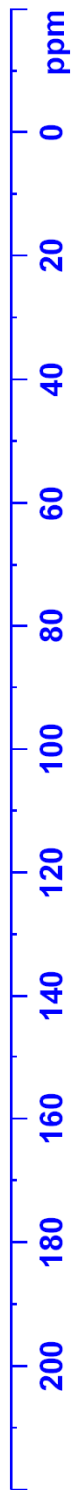

# <sup>1</sup>H NMR

7.6024  
7.5811  
7.5608  
7.4785  
7.4601  
7.4406  
7.3951  
7.3893  
7.3802  
7.3619  
7.3435  
7.3391  
7.3326  
7.3254  
7.3170  
7.3081  
7.2783  
7.2598  
4.2129  
4.2095  
4.1950  
4.1916  
4.1071  
4.0763  
4.0259  
4.0211  
4.0140  
4.0088  
4.0035  
3.9963  
3.9915  
3.9128  
3.8820  
3.7748  
3.7627  
3.7427  
3.7307  
3.6032  
3.5983  
3.5713  
3.5663  
3.4093  
3.3981  
3.3766  
3.3654  
3.0766  
3.0683  
3.0652  
3.0556  
3.0523  
3.0442  
2.8376  
2.8131  
2.8050  
2.7805  
1.5490  
1.3561

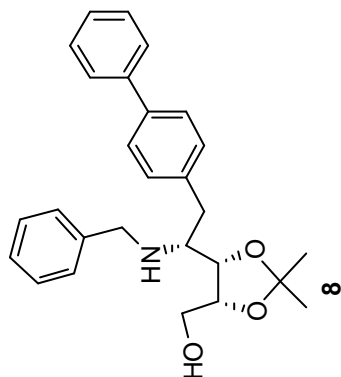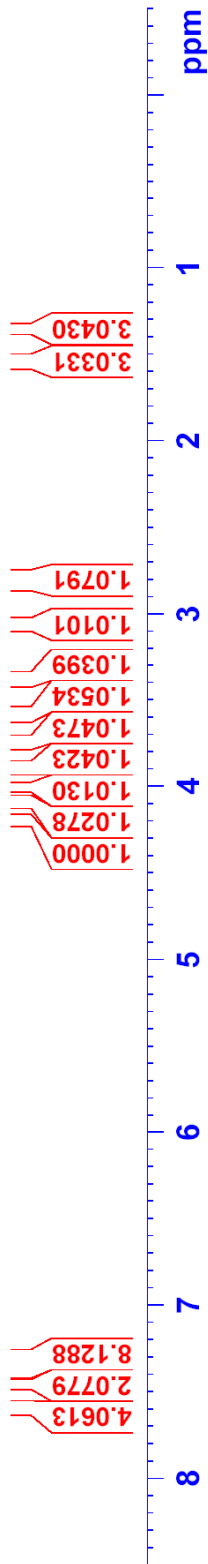

NAME WKWD44  
EXPNO 1  
PROCNO 1  
Date\_ 20110210  
Time\_ 21.03  
INSTRUM spect  
PROBHD 5 mm PADUL 13C  
PULPROG zg30  
TD 65536  
SOLVENT CDCl3  
NS 4  
DS 2  
SWH 8223.685 Hz  
FIDRES 0.125483 Hz  
AQ 3.9846387 sec  
RG 57  
DW 60.800 usec  
DE 6.50 usec  
TE 294.8 K  
D1 1.00000000 sec  
TD0 1  
===== CHANNEL f1 =====  
NUC1 1H  
P1 14.83 usec  
PL1 0.00 dB  
PL1W 8.31434441 W  
SFO1 400.1324710 MHz  
SI 32768  
SF 400.1300094 MHz  
EM 0  
WDW 0  
SSB 0.30 Hz  
LB 0  
GB 0  
PC 1.00

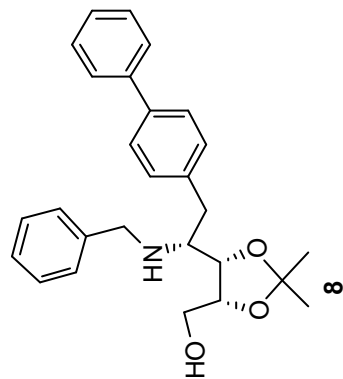

140.66  
139.44  
138.16  
137.69  
129.70  
128.79  
128.74  
128.66  
127.61  
127.38  
127.26  
126.94  
107.57

77.77  
77.38  
77.27  
77.06  
76.75  
76.40  
60.60  
56.56  
50.60  
36.97  
26.73  
24.78

NAME WKWD44\_c13  
EXPNO 1  
PROCNO 1  
Date\_ 20110210  
Time\_ 21.18  
INSTRUM spect  
PROBHD 5 mm PADUL 13C  
PULPROG zgpg30  
TD 65536  
SOLVENT CDCl3  
NS 12847  
DS 4  
SWH 24038.461 Hz  
FIDRES 0.366798 Hz  
AQ 1.3631988 sec  
RG 203  
DW 20.800 usec  
DE 6.50 usec  
TE 295.0 K  
D1 2.0000000 sec  
D11 0.0300000 sec  
TD0 1

===== CHANNEL f1 =====  
NUC1 13C  
P1 9.68 usec  
PL1 -0.60 dB  
PL1W 41.24164963 W  
SFO1 100.6228298 MHz

===== CHANNEL f2 =====  
CPDPRG2 waltz16  
NUC2 1H  
PCPD2 90.00 usec  
PL2 0.00 dB  
PL12 15.66 dB  
PL13 15.92 dB  
PL2W 8.31434441 W  
PL12W 0.22585411 W  
PL13W 0.21272963 W  
SFO2 400.1316005 MHz  
SI 32768  
SF 100.6127749 MHz  
WDW EM  
SSB 0  
LB 1.00 Hz  
GB 0  
PC 1.40

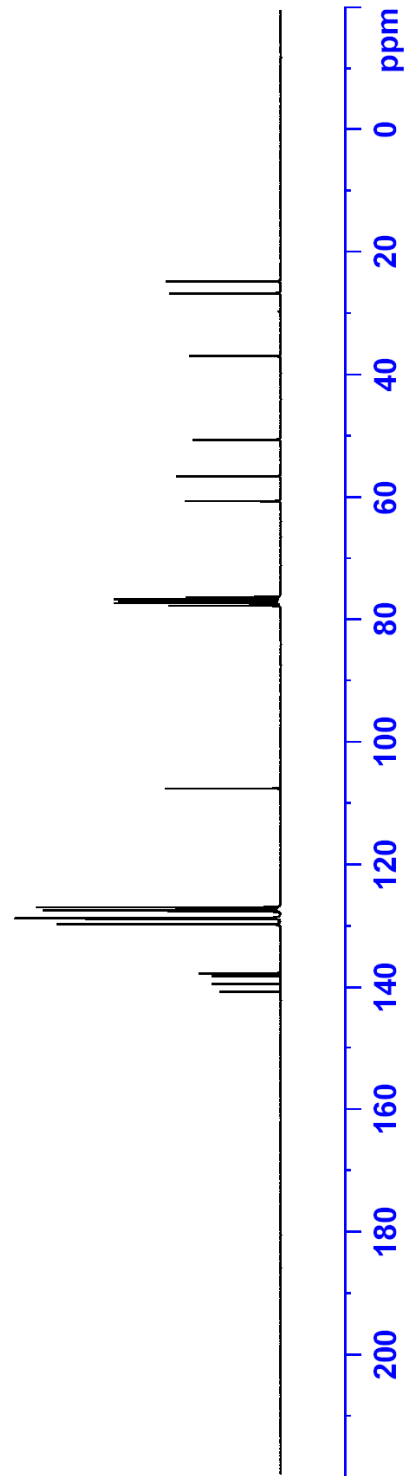

# <sup>13</sup>C NMR

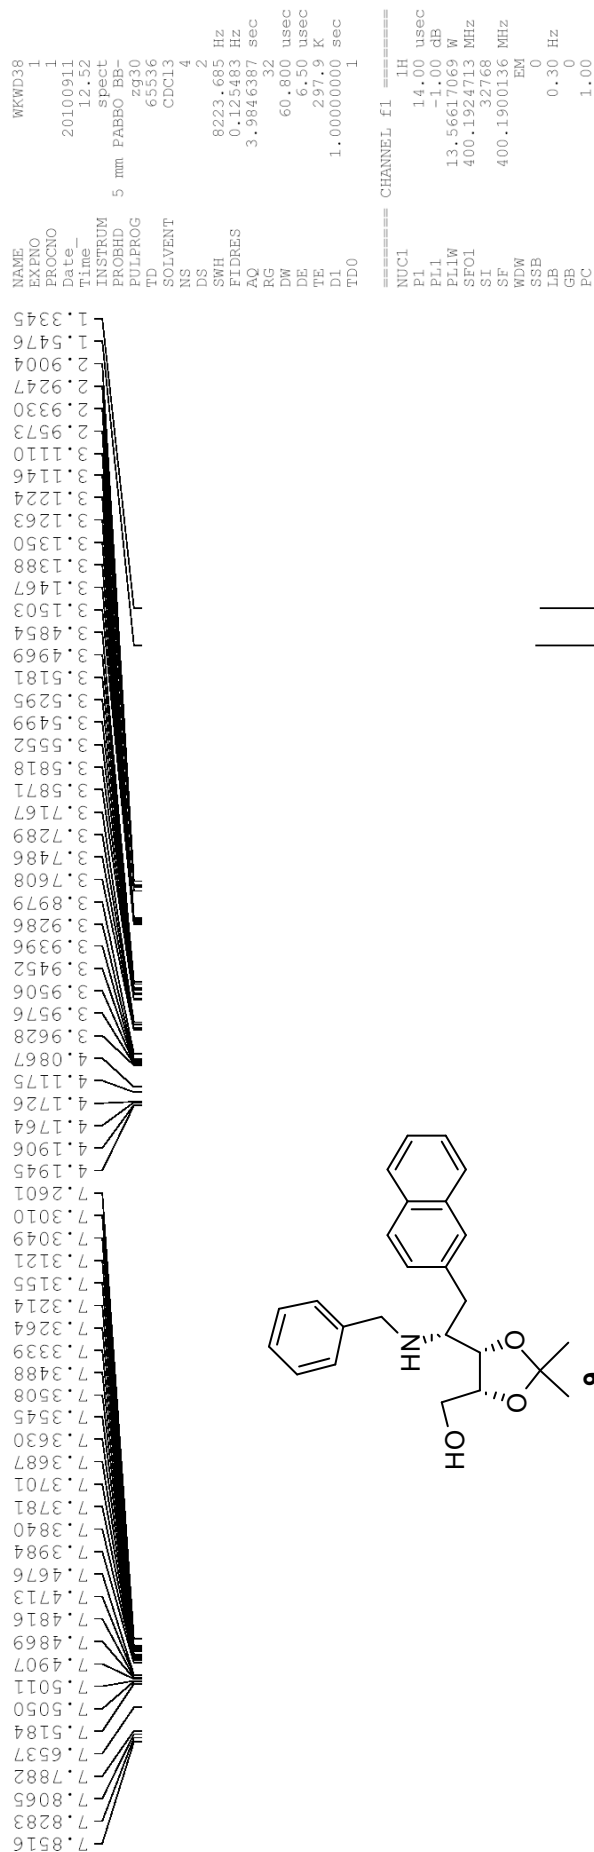

# <sup>13</sup>C NMR

3

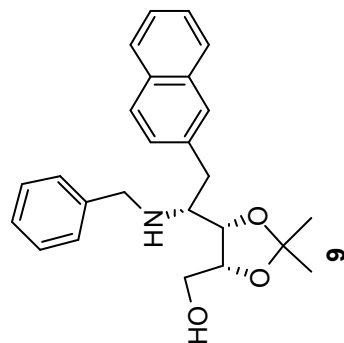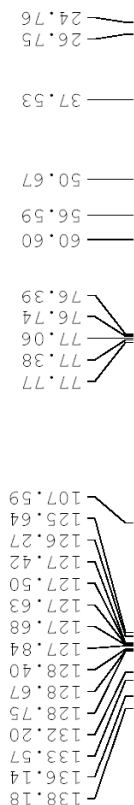

```

NAME          WKWD38_c13
EXPNO         1
PROCNO        1
Date_         20100911
Time_         13.26
INSTRUM       spect
PROBHD        5 mm PABBO BB-
PULPROG       zgpg30
TD            65536
SOLVENT       CDCl3
NS            485
DS            4
SWH           24038.461 Hz
FIDRES        0.366798 Hz
AQ            1.3631988 sec
RG            203
DE            20.800 usec
TE            298.5 K
D1            2.00000000 sec
D11           0.03000000 sec
TD0           1
  
```

```

===== CHANNEL f1 =====
NUC1          13C
P1            9.90 usec
PL1           -2.00 dB
PL1W          55.33689499 W
SFO1          100.6379183 MHz
  
```

```

===== CHANNEL f2 =====
CPDPRG2       waltz16
NUC2          1H
PCPD2         90.00 usec
PL2           -1.00 dB
PL12          15.16 dB
PL13          18.62 dB
PL2W          13.56617069 W
PL12W         0.32844096 W
PL13W         0.14806664 W
SFO2          400.1916008 MHz
SI            32768
SF            100.6278608 MHz
WDW           EM
SSB           0
LB            1.00 Hz
GB            0
PC            1.40
  
```

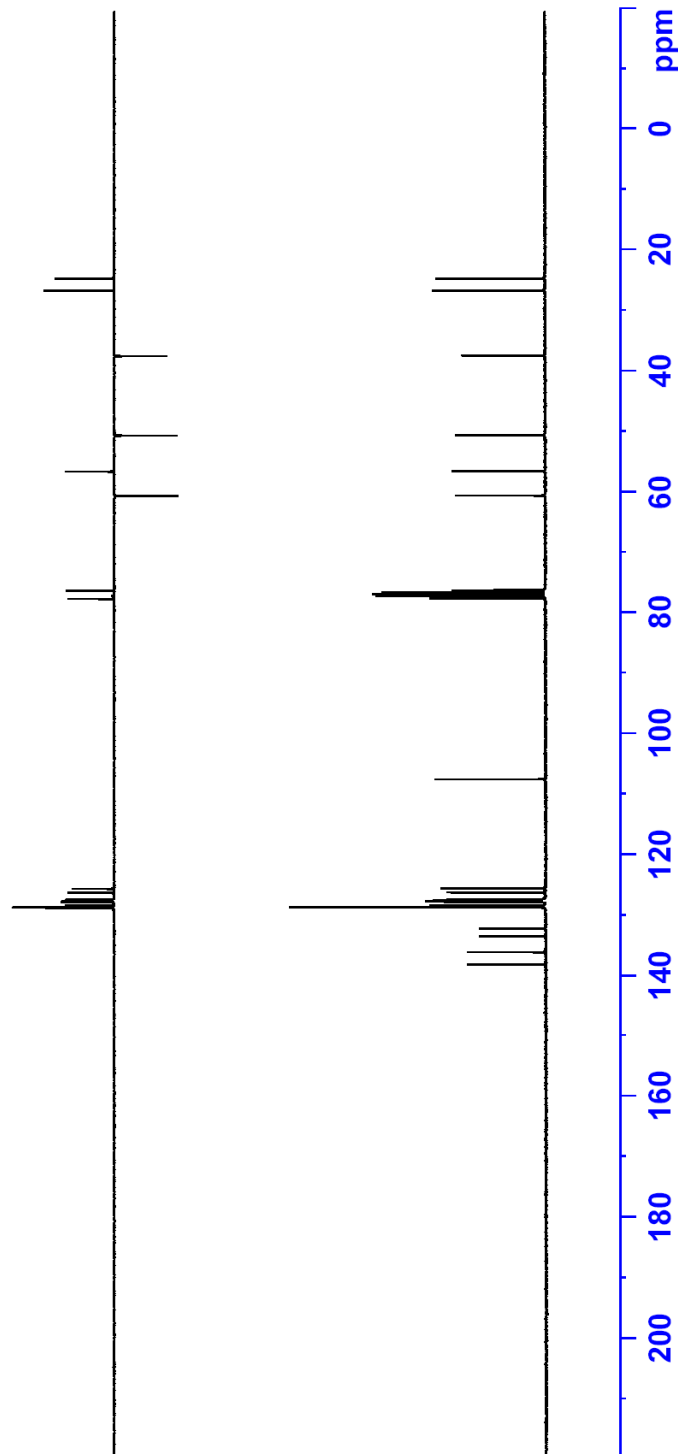

# <sup>1</sup>H NMR

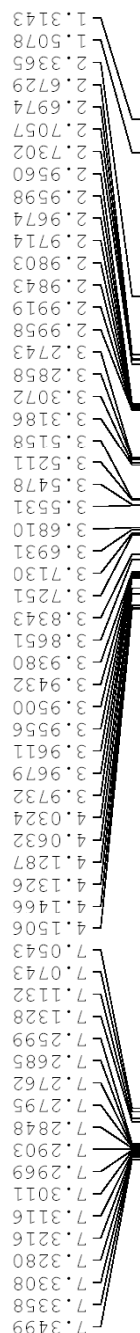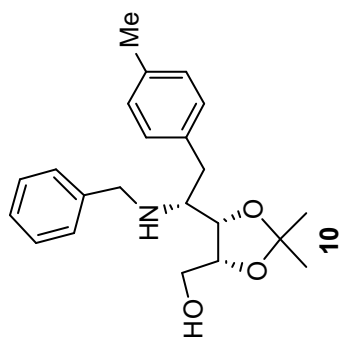

NAME: WKWD32\_2  
 EXPNO: 1  
 PROCNO: 1  
 Date\_: 20110519  
 Time: 12.50  
 INSTRUM: spect  
 PROBHD: 5 mm PABBO BB-  
 PULPROG: zg30  
 TD: 65536  
 SOLVENT: CDCl3  
 NS: 4  
 DS: 2  
 SWH: 8223.685 Hz  
 FIDRES: 0.125483 Hz  
 AQ: 3.9846387 sec  
 RG: 64  
 DW: 60.800 usec  
 DE: 6.50 usec  
 TE: 297.4 K  
 D1: 1.00000000 sec  
 TD0: 1

===== CHANNEL f1 =====  
 NUC1: 1H  
 P1: 14.00 usec  
 PL1: 1.00 dB  
 FLLW: 13.56617069 W  
 SF01: 400.1924713 MHz  
 SI: 32768  
 SF: 400.1900138 MHz  
 WDW: EM  
 SSB: 0  
 LB: 0.30 Hz  
 GB: 0  
 PC: 1.00

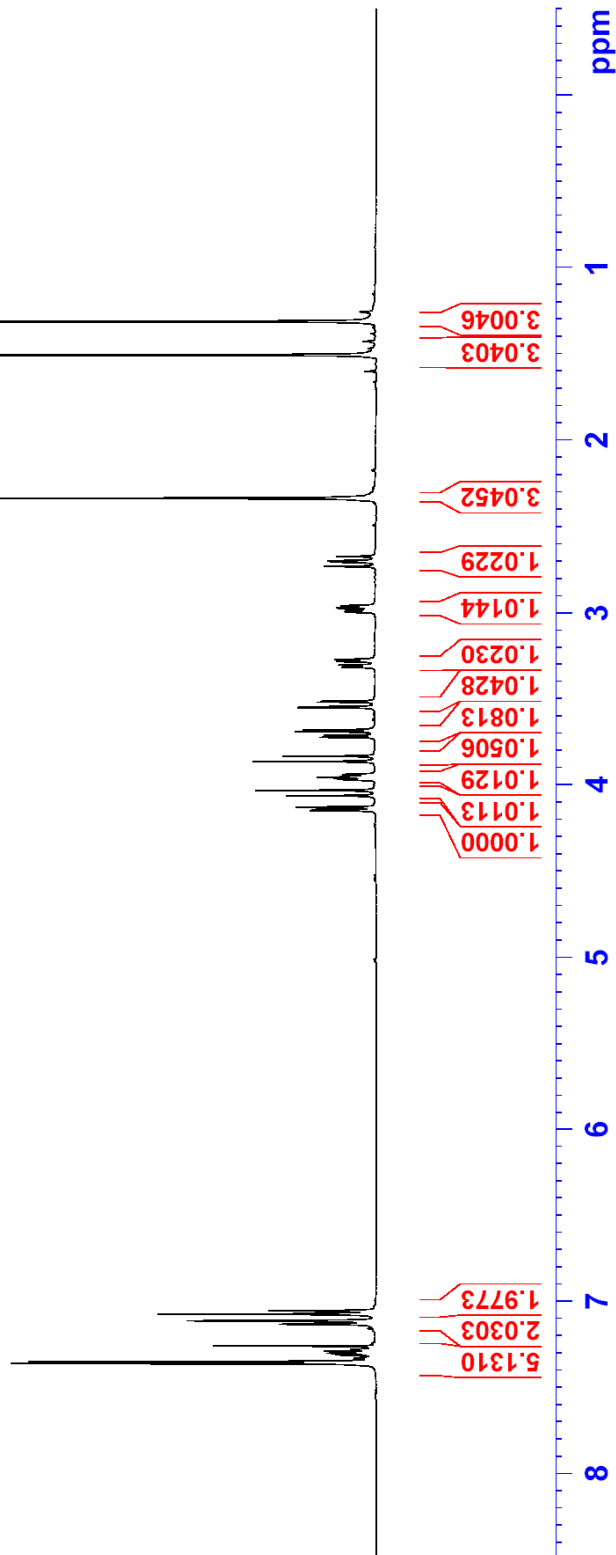

# <sup>13</sup>C NMR

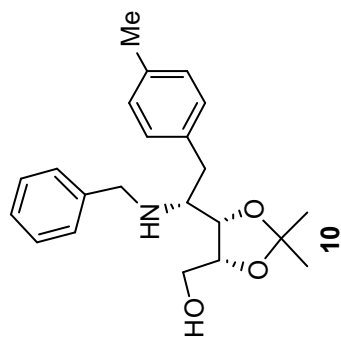

138.25  
136.10  
135.51  
129.41  
129.18  
128.74  
128.69  
127.60  
107.55  
77.82  
77.38  
77.06  
76.74  
76.38  
60.64  
56.66  
50.62  
36.92  
26.74  
24.79  
21.06

NAME WKWD32\_c13\_1  
EXNO 1  
PROCNO 1  
Date 20100828  
Time 9.41  
INSTRUM spect  
PROBHD 5 mm PABBI 1H/  
PULPROG zgpg30  
TD 65536  
SOLVENT CDCl3  
NS 11637  
DS 4  
SWH 24038.461 Hz  
FIDRES 0.366798 Hz  
AQ 1.3631988 sec  
RG 203  
DE 20.800 usec  
TE 298.2 K  
D1 2.0000000 sec  
D11 0.0300000 sec  
TD0 1

===== CHANNEL f1 =====  
NUC1 13C  
P1 14.50 usec  
PL1 -4.00 dB  
PL1W 90.22689819 W  
SFO1 100.6228298 MHz

===== CHANNEL f2 =====  
CPDPRG2 waltz16  
NUC2 1H  
PCPD2 80.00 usec  
PL2 -2.00 dB  
PL12 18.80 dB  
PL13 18.80 dB  
PL2W 13.17734718 W  
PL12W 0.10960442 W  
PL13W 0.10960442 W  
SFO2 400.1316005 MHz  
SI 32768  
SF 100.6127675 MHz  
WDW EM  
SSB 0  
LB 1.00 Hz  
GB 0  
PC 1.40

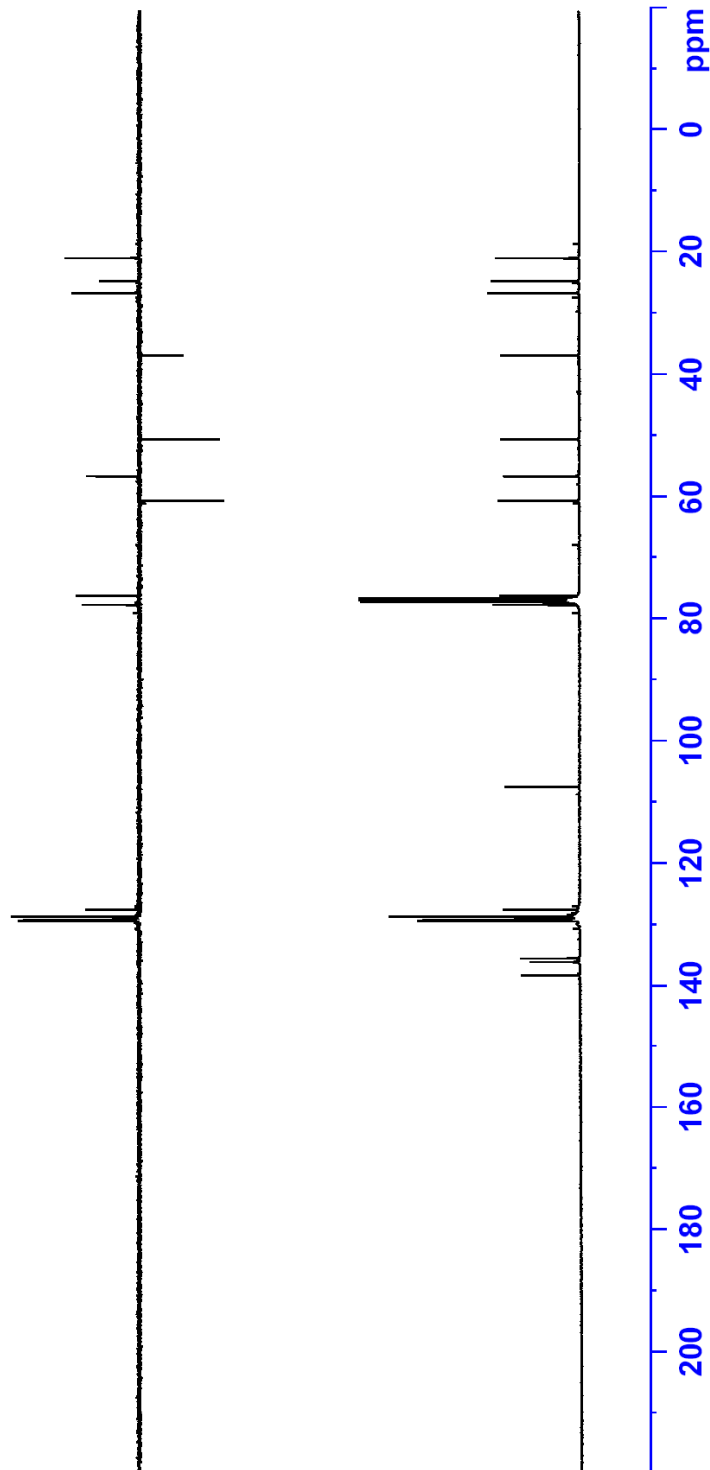

# <sup>1</sup>H NMR

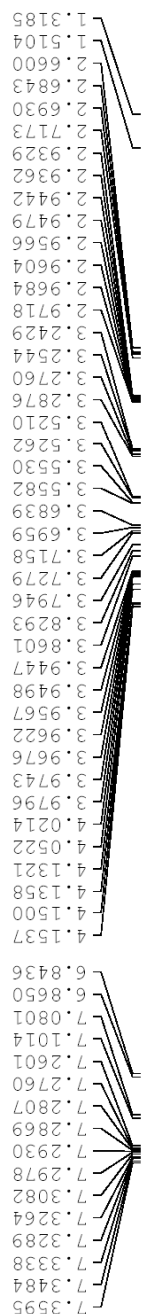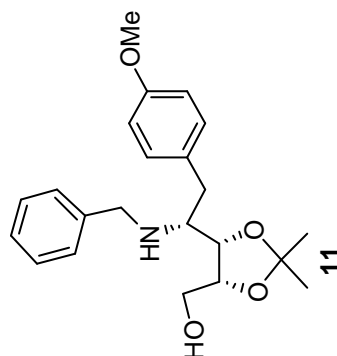

NAME WKWD34\_1  
EXPNO 1  
PROCNO 1  
Date\_ 20110513  
Time\_ 18.20  
INSTRUM spect  
PROBHD 5 mm PABBO BB-  
PULPROG zg30  
TD 65536  
SOLVENT CDCl3  
NS 4  
DS 2  
SWH 8223.685 Hz  
FIDRES 0.125483 Hz  
AQ 3.9846387 sec  
RG 25.4  
DW 60.800 usec  
DE 6.50 usec  
TE 296.8 K  
D1 1.00000000 sec  
TD0 1

===== CHANNEL f1 =====  
NUCL 1H  
P1 14.00 usec  
PL1 -1.00 dB  
PL1W 13.56617069 W  
SFO1 400.1924713 MHz  
SI 32768  
SF 400.1900136 MHz  
WDW EM  
SSB 0  
LB 0.30 Hz  
GB 0  
FC 1.00

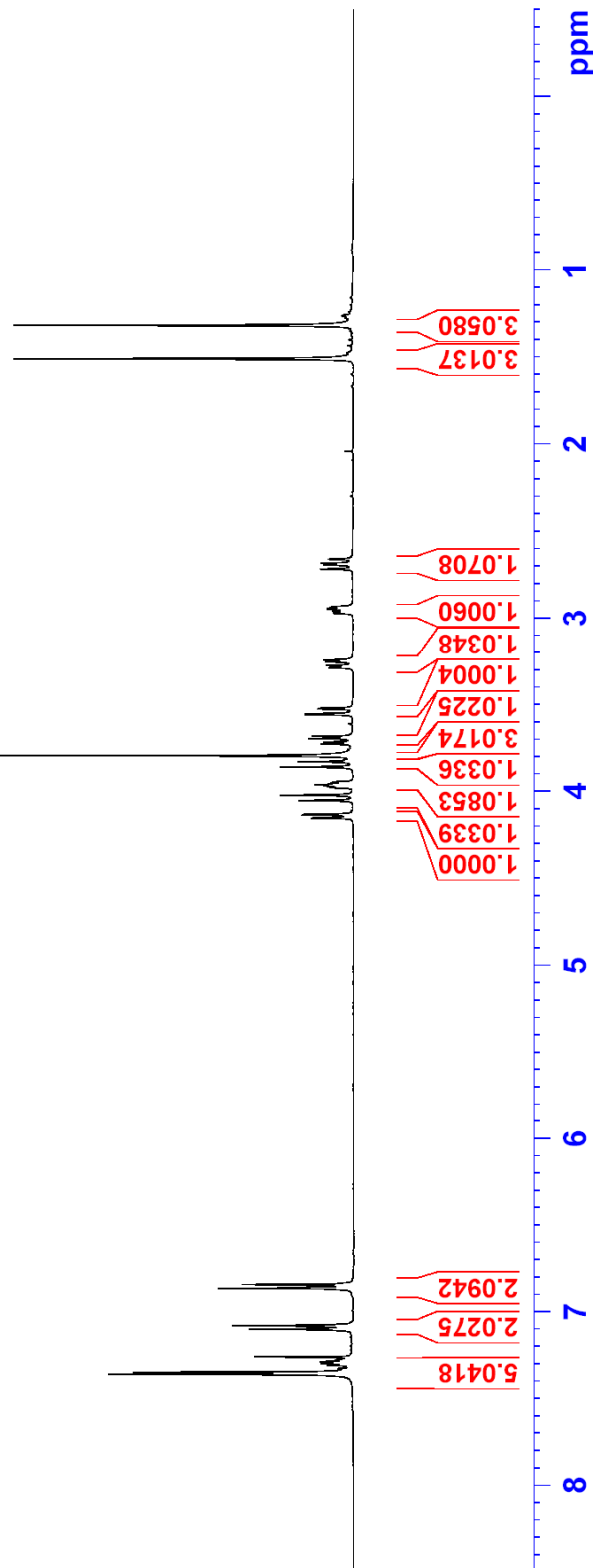



# <sup>13</sup>C NMR

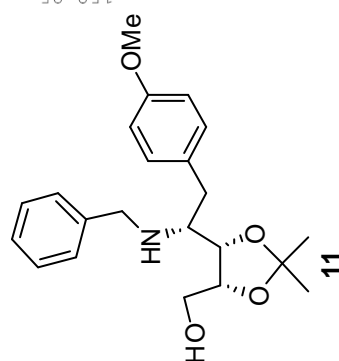

158.25  
138.22  
130.50  
130.19  
128.69  
128.63  
127.54  
114.09  
107.50  
77.78  
77.37  
77.06  
76.74  
76.33  
60.62  
56.61  
55.22  
50.57  
36.40  
26.71  
24.76

NAME WKWD34\_C13  
EXPNO 1  
PROCNO 1  
Date\_ 20110513  
Time\_ 18.54  
INSTRUM spect  
PROBHD 5 mm PABBO BB-  
PULPROG zgpg30  
TD 65536  
SOLVENT CDCl3  
NS 439  
DS 4  
SWH 24038.461 Hz  
FIDRES 0.366798 Hz  
AQ 1.3631988 sec  
RG 203  
DW 20.800 usec  
DE 6.50 usec  
TE 297.4 K  
D1 2.0000000 sec  
D11 0.0300000 sec  
TD0 1

===== CHANNEL f1 =====  
NUC1 13C  
P1 9.90 usec  
PL1 -2.00 dB  
PL1W 55.33689499 W  
SFO1 100.6379183 MHz

===== CHANNEL f2 =====  
CPDPRG2 waltz16  
NUC2 1H  
PCPD2 90.00 usec  
PL2 -1.00 dB  
PL12 15.16 dB  
PL13 18.62 dB  
PL2W 13.56617069 W  
PL12W 0.32844096 W  
PL13W 0.14806664 W  
SFO2 400.1916008 MHz  
SI 32768  
SF 100.6278623 MHz  
WDW EM  
SSB 0  
LB 1.00 Hz  
GB 0  
PC 1.40

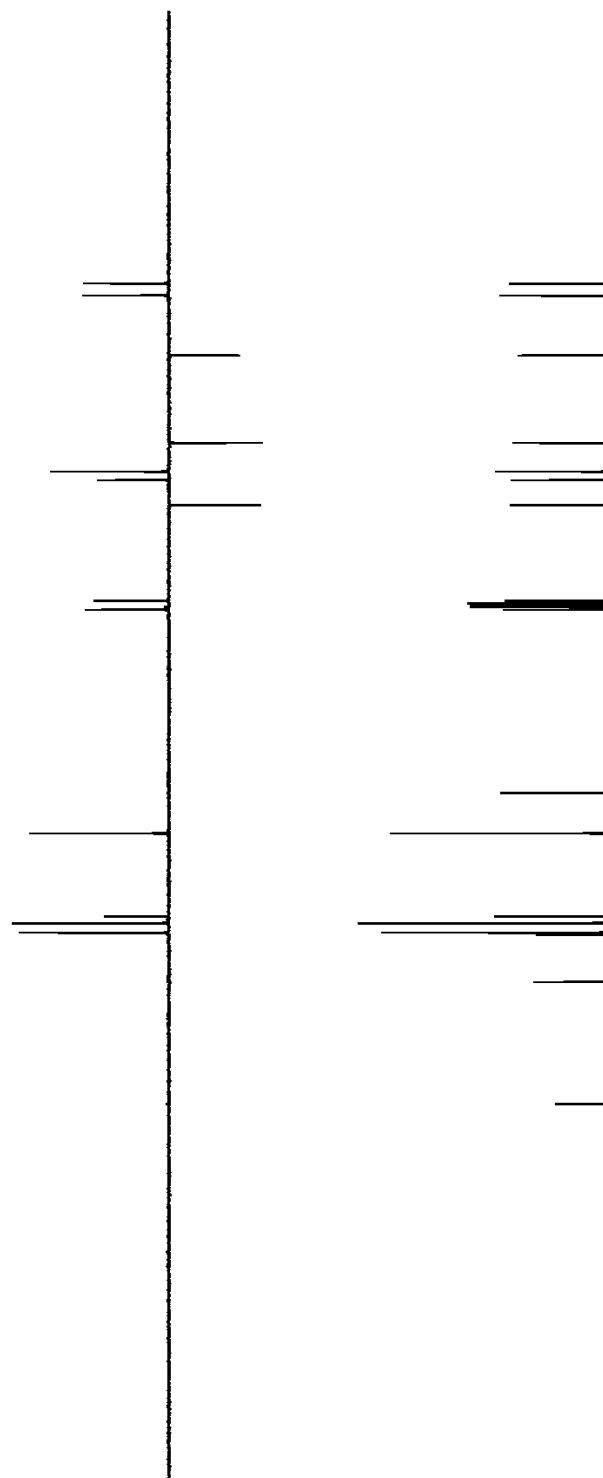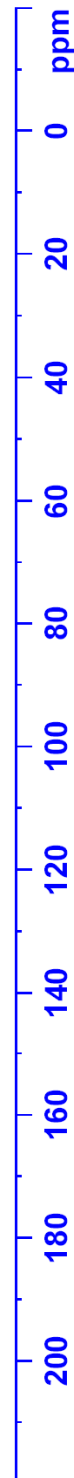

# <sup>1</sup>H NMR

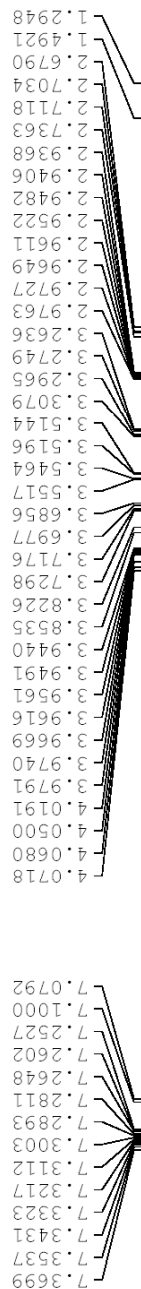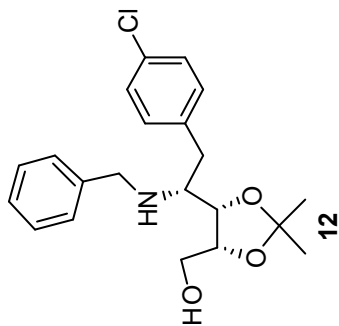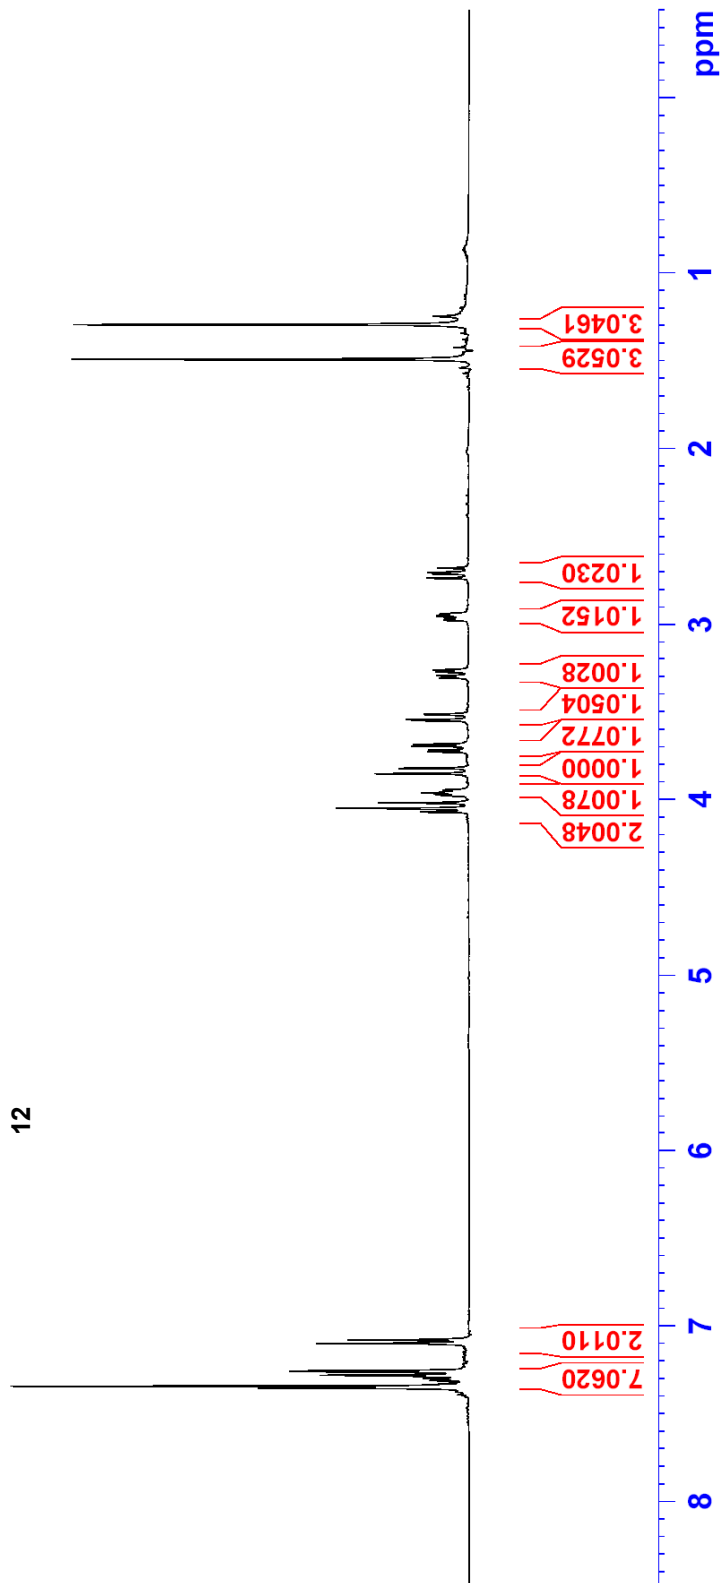

# <sup>13</sup>C NMR

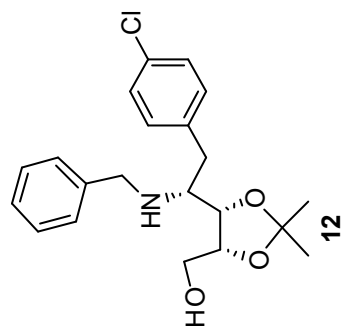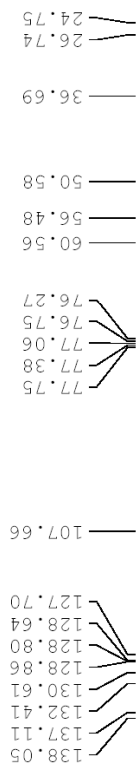

```

NAME WKWD39_C13_1
EXPNO 1
PROCNO 1
Date_ 20110523
Time_ 11.24
INSTRUM spect
PROBHD 5 mm F4BBO BB-
PULPROG zgpg30
TD 65536
SOLVENT CDCl3
NS 617
DS 4
SWH 24038.461 Hz
FIDRES 0.366798 Hz
AQ 1.3631988 sec
RG 228
DW 20.800 usec
DE 6.50 usec
TE 297.7 K
D1 2.0000000 sec
D11 0.0300000 sec
TD0 1

===== CHANNEL f1 =====
NUC1 13C
P1 9.90 usec
PL1 -2.00 dB
PL1W 55.33689499 W
SFO1 100.6379183 MHz

===== CHANNEL f2 =====
CPDPRG2 waltz16
NUC2 1H
PCPD2 90.00 usec
PL2 -1.00 dB
PL2W 15.16 dB
PL13 18.62 dB
PL2W 13.56617069 W
PL12W 0.32844096 W
PL13W 0.14806664 W
SFO2 400.1916008 MHz
SI 32768
SF 100.6278564 MHz
WDW EM
SSB 0
LB 1.00 Hz
GB 0
PC 1.40

```

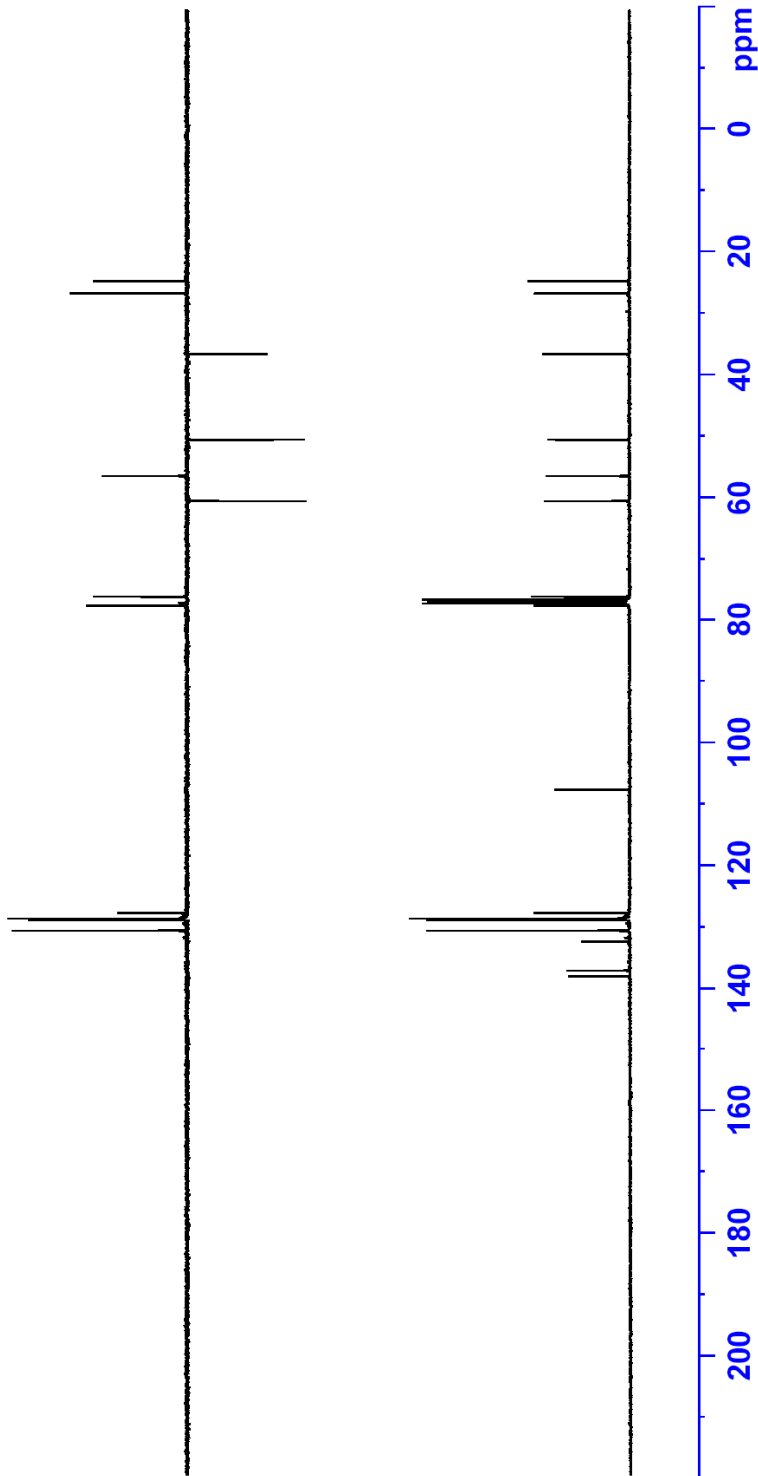

# <sup>1</sup>H NMR

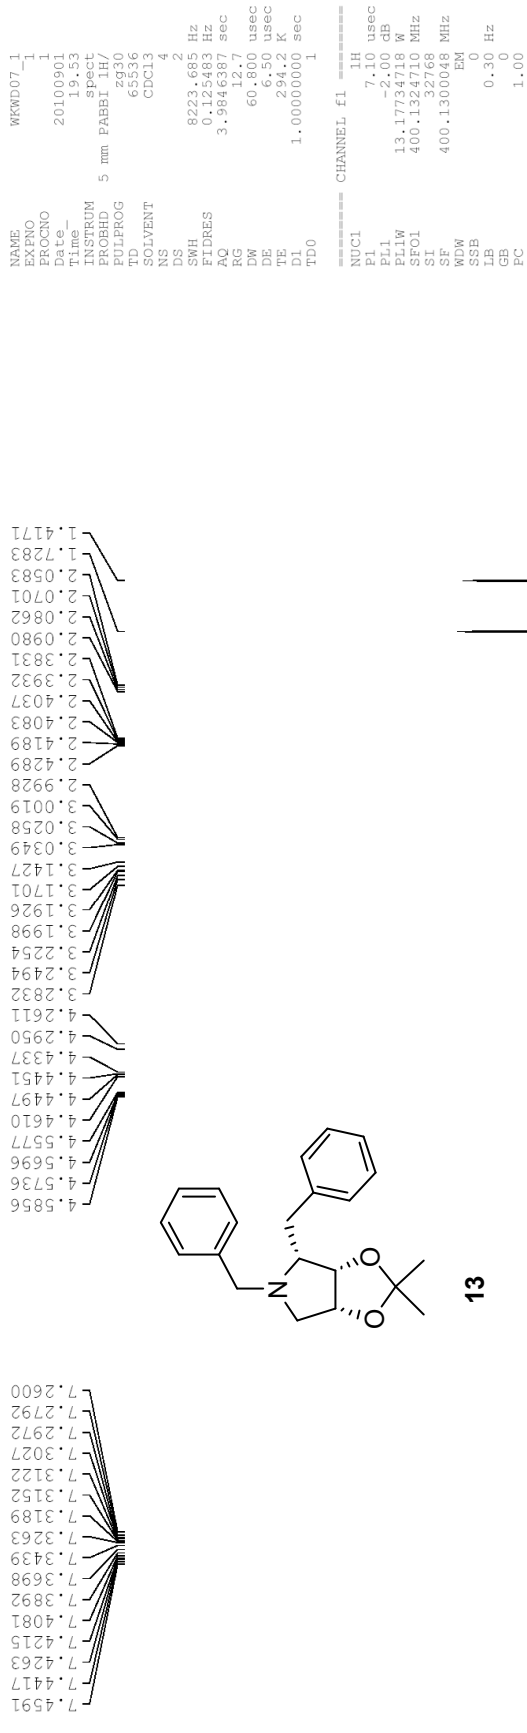

# <sup>13</sup>C NMR

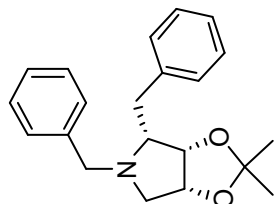

13

139.58  
139.65  
138.65  
129.48  
128.53  
128.21  
126.82  
125.95  
110.99  
80.40  
77.49  
77.38  
77.06  
76.74  
70.20  
59.87  
57.07  
33.34  
26.49  
25.83

```

NAME          WRWD07_c13_1
EXPNO         1
PROCNO        2
Date_         20100901
Time_         20.25
INSTRUM       spect
PROBHD        5 mm PABBI 1H/
PULPROG       zgpg30
TD            65536
SOLVENT       CDCl3
NS            378
DS            4
SWH           24038.461 Hz
FIDRES        0.366798 Hz
AQ            1.3631988 sec
RG            203
DE            20.800 usec
TE            294.6 K
D1            2.00000000 sec
D11           0.03000000 sec
TD0           1

===== CHANNEL f1 =====
NUC1          13C
P1            14.50 usec
PL1           -4.00 dB
PL1W          90.22689819 W
SFO1          100.6282898 MHz

===== CHANNEL f2 =====
CPDPRG2       waltz16
NUC2          1H
PCPD2         80.00 usec
PL2           -2.00 dB
PL12          18.80 dB
PL13          18.80 dB
PL2W          13.17734718 W
PL12W         0.10960442 W
PL13W         0.10960442 W
SFO2          400.1316003 MHz
SI            32768
SF            100.6127852 MHz
WDW           EM
SSB           0
LB            1.00 Hz
GB            0
PC            1.40
  
```

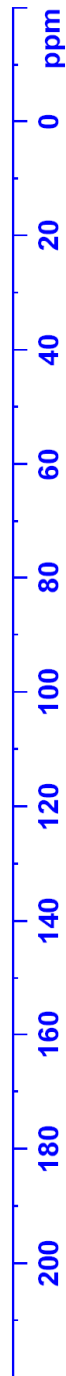

# <sup>1</sup>H NMR

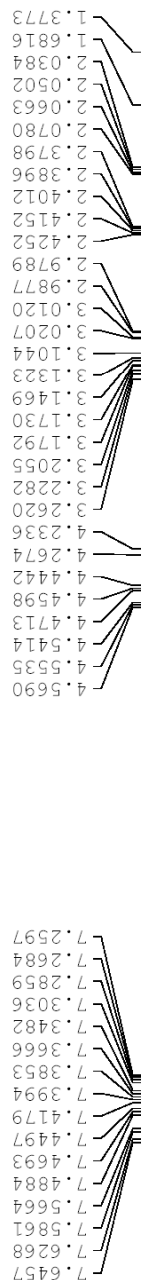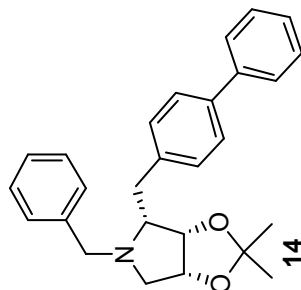

NAME WKWD45\_1  
 EXNO 1  
 PROCNO 1  
 Date 20110503  
 Time 20.35  
 INSTRUM spect  
 PROBD 5 mm PABBO BB-  
 PULPROG zg30  
 TD 65536  
 SOLVENT CDCl3  
 NS 4  
 DS 2  
 SWH 8223.685 Hz  
 FIDRES 0.125483 Hz  
 AQ 3.9846387 sec  
 RG 32  
 DW 60.800 usec  
 DE 6.50 usec  
 TE 296.8 K  
 D1 1.00000000 sec  
 TD0 1  
 ===== CHANNEL f1 =====  
 NUC1 LH  
 P1 14.00 usec  
 PL1 -1.00 dB  
 PL1W 13.56617069 W  
 SF01 400.1924713 MHz  
 SI 32768  
 SF 400.1900138 MHz  
 WDW EM  
 SSB 0  
 LB 0.30 Hz  
 GB 0  
 PC 1.00

# <sup>13</sup>C NMR

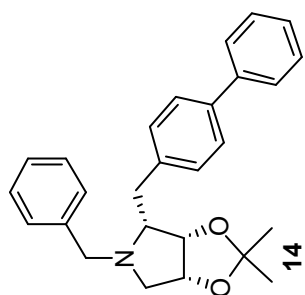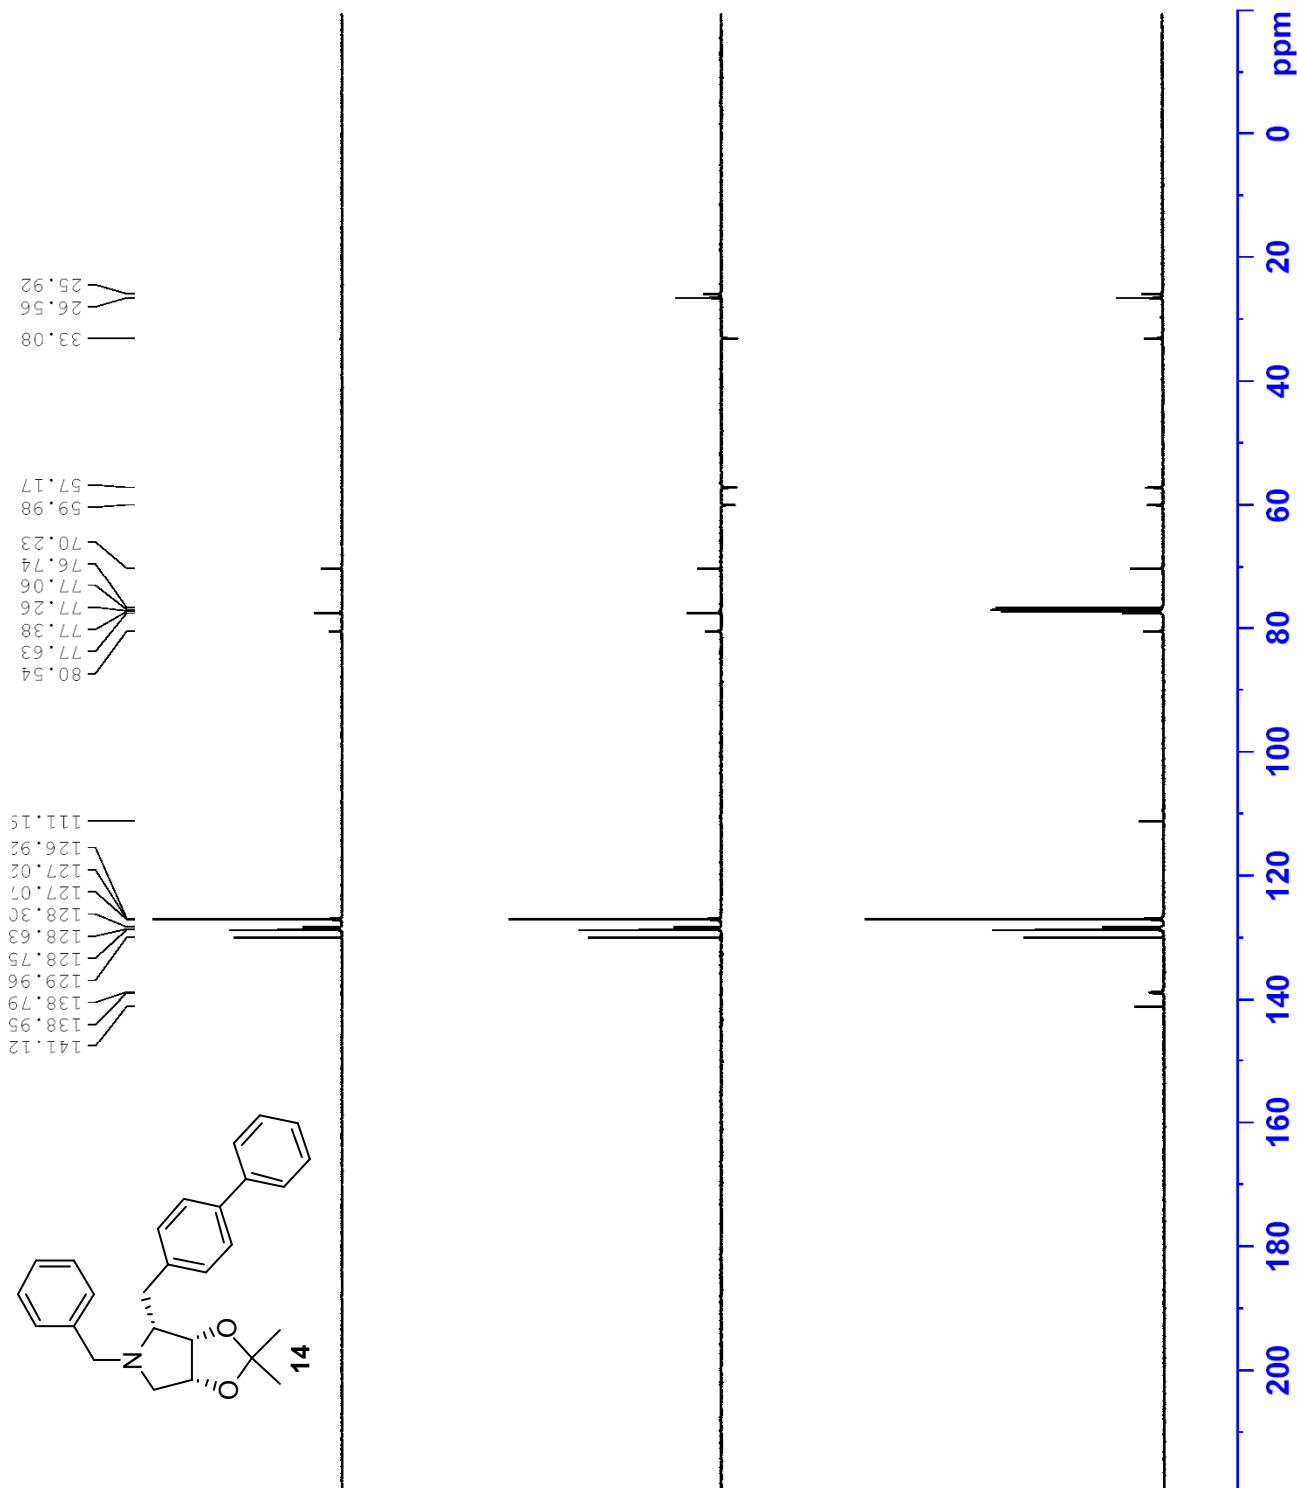

```

NAME          WKWD45_c13
EXPNO         1
PROCNO        1
Date_         20110212
Time-         11.56
INSTRUM       spect
PROBHD        5 mm PABO BB-
PULPROG       zgpg30
TD            65536
SOLVENT       CDCl3
NS            627
DS            4
SWH           24038.461 Hz
FIDRES        0.366798 Hz
AQ            1.3631988 sec
RG            181
DW            20.800 usec
DE            6.50 usec
TE            298.4 K
D1            2.00000000 sec
D11           0.03000000 sec
TD0           1

===== CHANNEL f1 =====
NUC1          13C
P1            9.90 usec
PL1           -2.00 dB
PL1W          55.33689499 W
SFO1          100.6379183 MHz

===== CHANNEL f2 =====
CPDPRG2       waltz16
NUC2          1H
PCPD2         90.00 usec
PL2           -1.00 dB
PL12          15.16 dB
PL13          18.62 dB
PL2W          13.56617069 W
PL12W         0.32844096 W
PL13W         0.14806664 W
SFO2          400.1916008 MHz
SI            32768
SF            100.6278571 MHz
WDW           EM
SSB           0
LB            1.00 Hz
GB            0
PC            1.40
  
```

# <sup>1</sup>H NMR

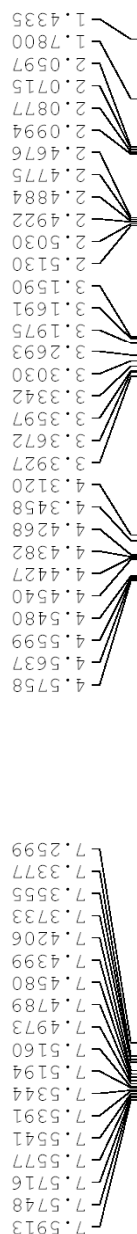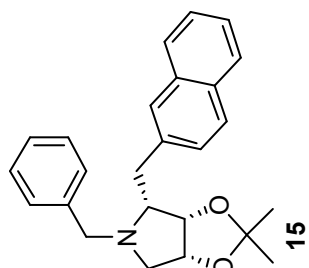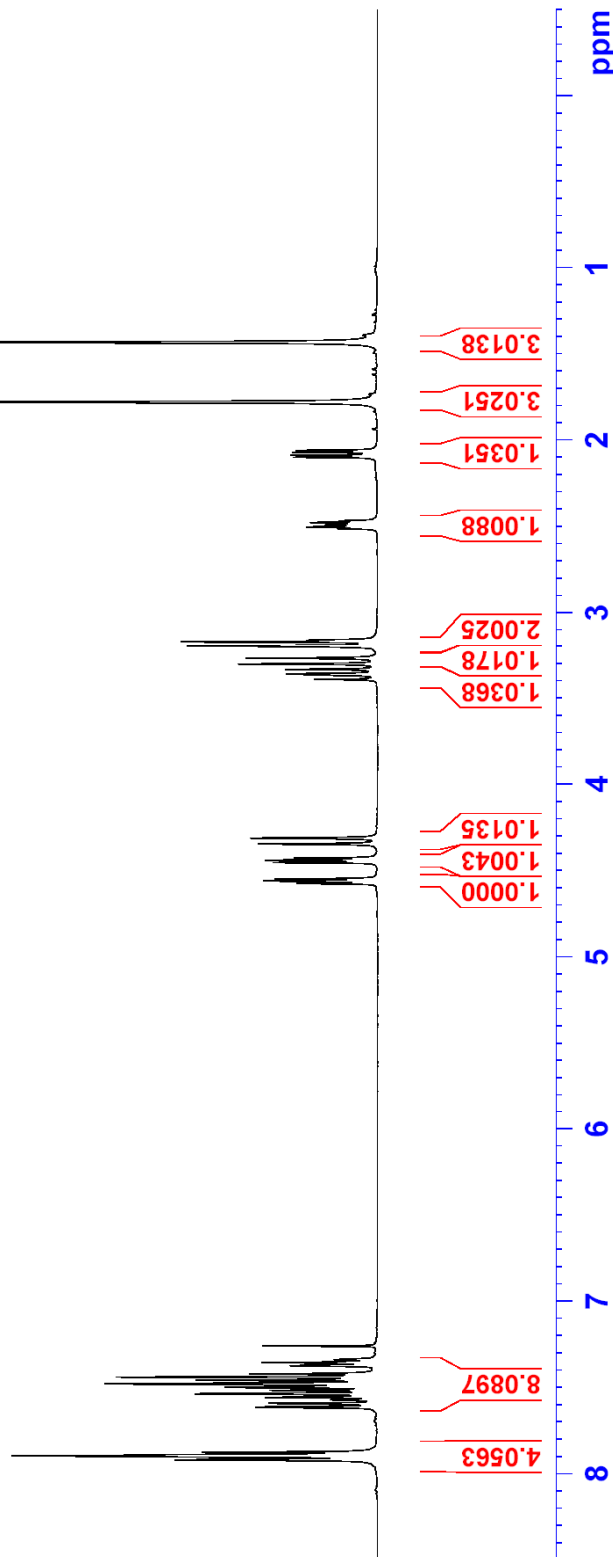

NAME WKWD42  
 EXPNO 1  
 PROCNO 1  
 Date\_ 20100916  
 Time 13.43  
 INSTRUM spect  
 PROHD 5 mm PABBI 1H/  
 PULPROG zg30  
 TD 65536  
 SOLVENT CDCl3  
 NS 4  
 DS 2  
 SWH 8223.685 Hz  
 FIDRES 0.125483 Hz  
 AQ 3.9846387 sec  
 RG 14.2  
 DW 60.800 usec  
 DE 6.50 usec  
 TE 294.7 K  
 D1 1.0000000 sec  
 D11 1  
 D10 1

CHANNEL f1

NUC1 1H  
 P1 7.10 usec  
 PL1 -2.00 dB  
 PL1W 13.17734718 W  
 SFO1 400.1324710 MHz  
 SI 32768  
 SF 400.1300048 MHz  
 EM 0  
 WDW 0  
 SSB 0.30 Hz  
 LB 0  
 GB 0  
 PC 1.00



# <sup>13</sup>C NMR

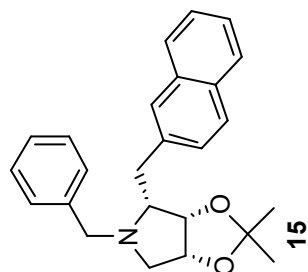

138.72  
137.18  
133.55  
132.05  
128.54  
128.23  
128.22  
127.71  
127.68  
127.57  
127.51  
126.85  
125.80  
125.19  
111.05

80.44  
77.53  
77.38  
77.06  
76.74  
70.18  
59.89  
57.15  
33.51  
26.55  
25.85

NAME WKWD42\_c13  
EXPNO 1  
PROCNO 1  
Date\_ 20100916  
Time\_ 14.22  
INSTRUM spect  
PROBHD 5 mm FABI 1H/  
PULPROG zgpg30  
TD 65536  
SOLVENT CDCl3  
NS 442  
DS 4  
SWH 24038.461 Hz  
FIDRES 0.366798 Hz  
AQ 1.363198 sec  
RG 203  
DW 20.800 usec  
DE 6.50 usec  
TE 294.8 K  
D1 2.0000000 sec  
D11 0.0300000 sec  
TD0 1

===== CHANNEL f1 =====  
NUC1 13C  
P1 14.50 usec  
PL1 -4.00 dB  
PL1W 90.22689819 W  
SFO1 100.6228298 MHz

===== CHANNEL f2 =====  
CPDPRG2 waltz16  
NUC2 1H  
PCPD2 80.00 usec  
PL2 -2.00 dB  
PL12 18.80 dB  
PL13 18.80 dB  
PL12W 13.17734718 W  
PL12W 0.10960442 W  
PL13W 0.10960442 W  
SFO2 400.1316005 MHz  
SI 32768  
SF 100.6127859 MHz  
WDW EM  
SSB 0  
LB 1.00 Hz  
GB 0  
PC 1.40

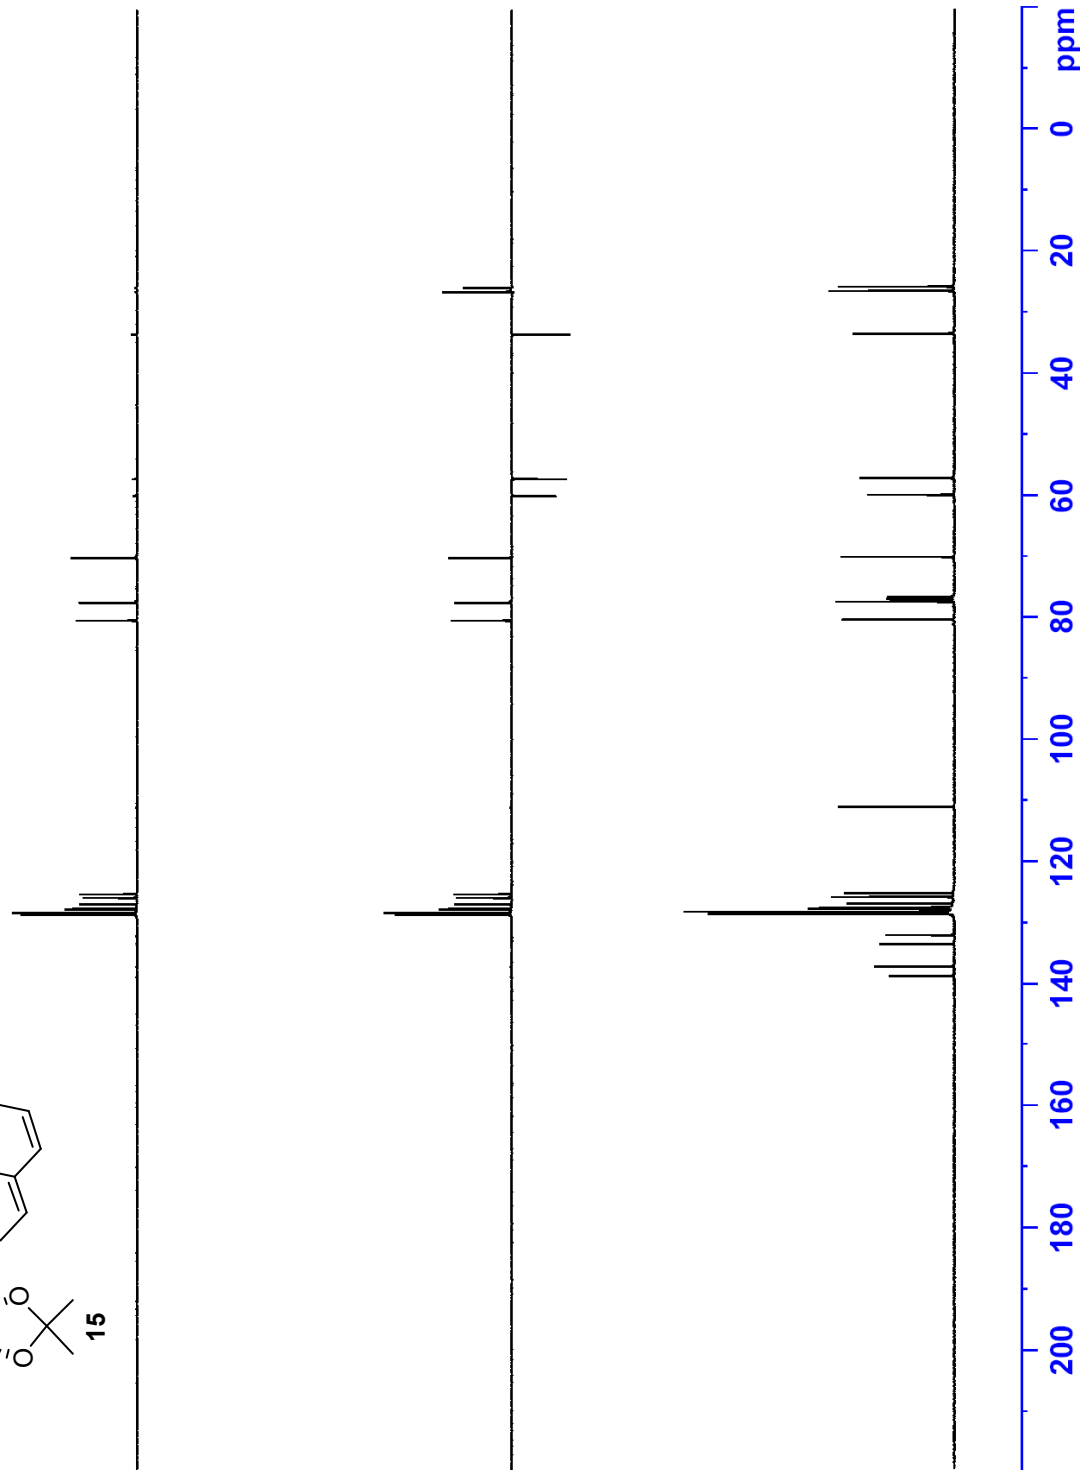

# <sup>1</sup>H NMR

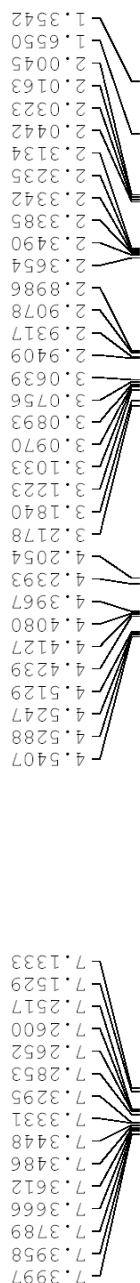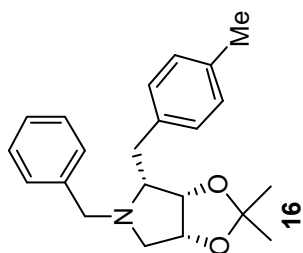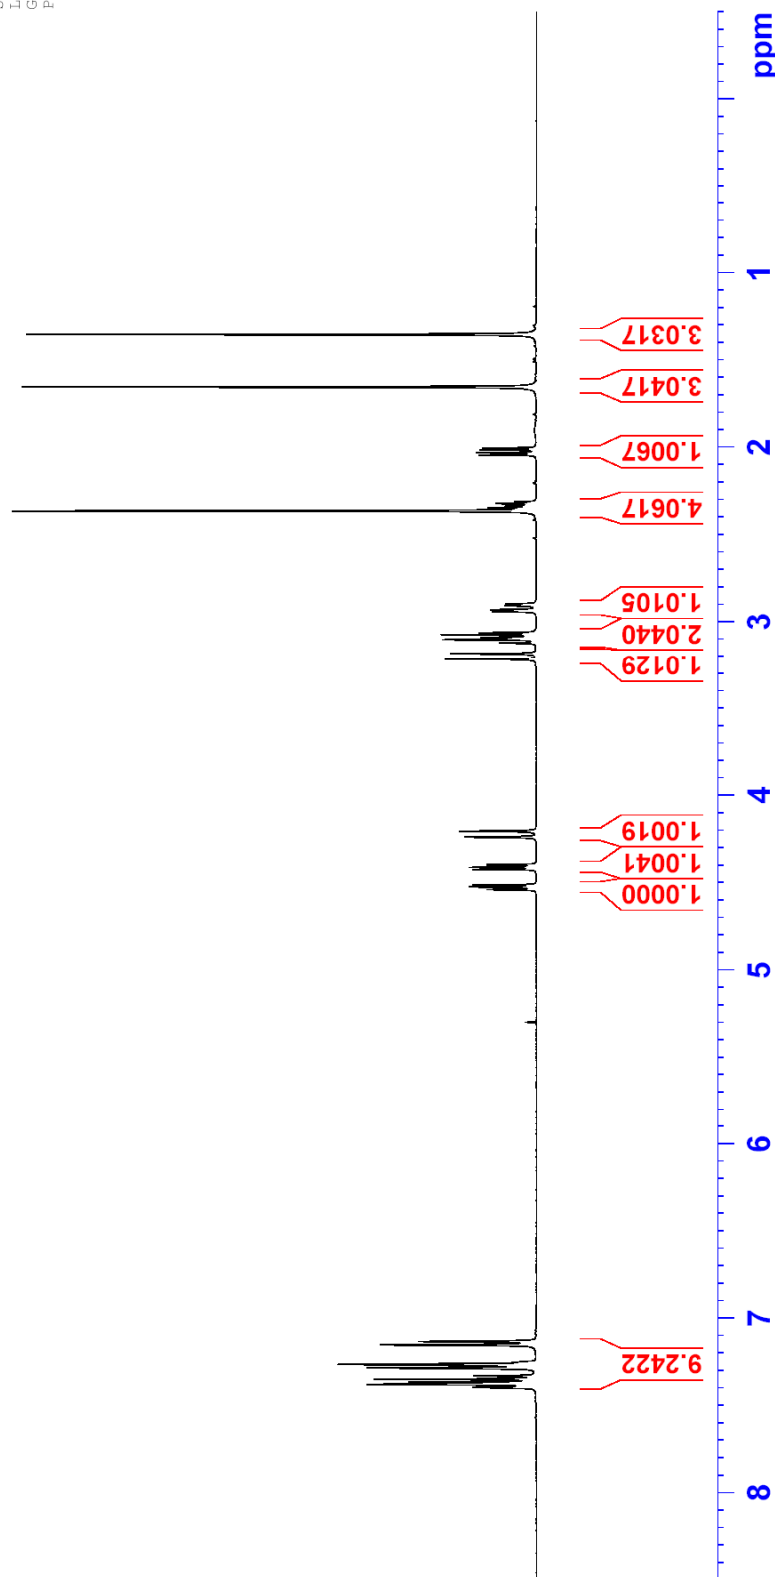

NAME WKWD33  
EXNO 1  
PROCNO 1  
Date 20100831  
Time 10.44  
INSTRUM spect  
PROBHD 5 mm PABBO BB-  
PULPROG zg30  
TD 65536  
SOLVENT CDCl3  
NS 4  
DS 2  
SWH 8223.685 Hz  
FIDRES 0.125483 Hz  
AQ 3.9846387 sec  
RG 28.5  
DW 60.800 usec  
DE 6.50 usec  
TE 297.8 K  
D1 1.00000000 sec  
TD0 1  
===== CHANNEL f1 =====  
NUC1 1H  
P1 14.00 usec  
PL1 -1.00 dB  
PL1W 13.56617069 W  
SFO1 400.1924713 MHz  
SI 32768  
SF 400.1900138 MHz  
WDW EM  
SSB 0  
LB 0.30 Hz  
GB 0  
PC 1.00

# <sup>13</sup>C NMR

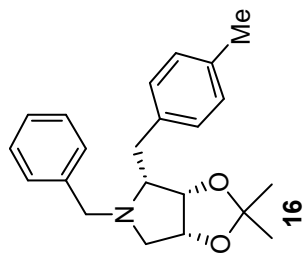

138.81  
136.56  
135.41  
129.39  
128.97  
128.59  
128.24  
126.84  
111.07

80.55  
77.58  
77.37  
77.06  
76.74  
70.37  
59.99  
57.16

32.94  
26.55  
25.91  
21.07

NAME WKWD33\_cl13  
EXPNO 1  
PROCNO 1  
Date\_ 20100831  
Time\_ 10.59  
INSTRUM spect  
PROBHD 5 mm PABBO BB-  
PULPROG zgpg30  
TD 65536  
SOLVENT CDCl3  
NS 546  
DS 4  
SWH 24038.461 Hz  
FIDRES 0.366798 Hz  
AQ 1.3631988 sec  
RG 203  
DW 20.800 usec  
DE 6.50 usec  
TE 298.4 K  
D1 2.00000000 sec  
D11 0.03000000 sec  
TD0 1

===== CHANNEL f1 =====  
NUC1 13C  
P1 9.90 usec  
PL1 -2.00 dB  
PL1W 55.33689499 W  
SFO1 100.6379183 MHz

===== CHANNEL f2 =====  
CPDPRG2 waltz16  
NUC2 1H  
PCPD2 90.00 usec  
PL2 -1.00 dB  
PL12 15.16 dB  
PL13 18.62 dB  
PL2W 13.56617069 W  
PL12W 0.32844096 W  
PL13W 0.14806664 W  
SFO2 400.1916008 MHz  
SI 32768  
SF 100.6278601 MHz  
WDW EM  
SSB 0  
LB 1.00 Hz  
GB 0  
PC 1.40

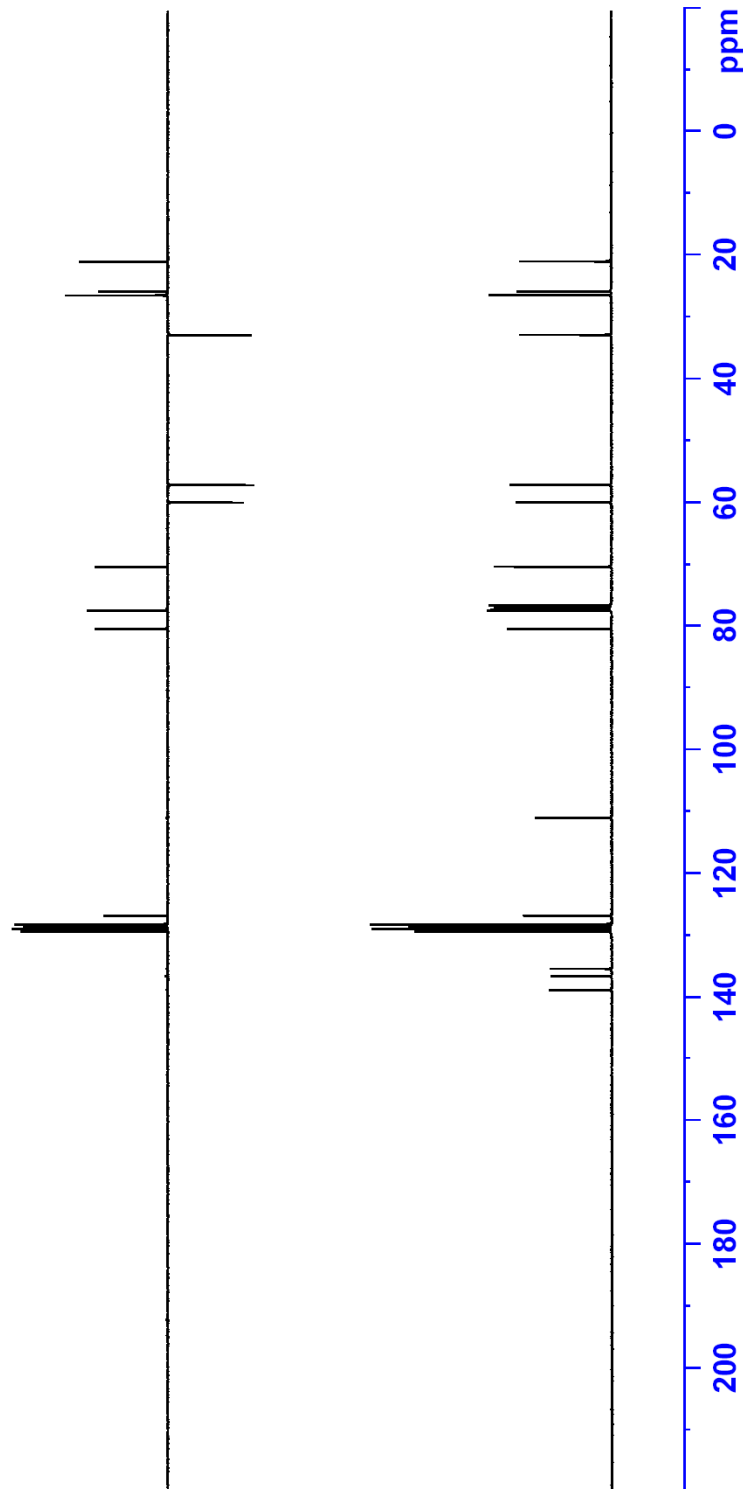

# <sup>1</sup>H NMR

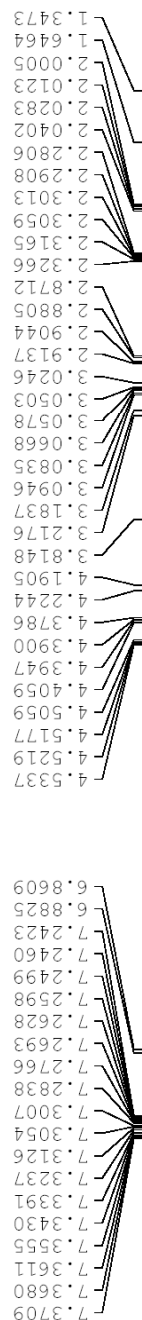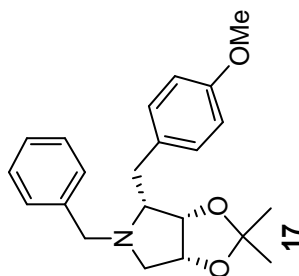

NAME WKWD35\_1  
EXPNO 1  
PROCNO 1  
Date\_ 20110514  
Time 17.27  
INSTRUM spect  
PROBHD 5 mm PABUL 13C  
PULPROG zg30  
TD 65536  
SOLVENT CDCl3  
NS 4  
DS 2  
SWH 8223.685 Hz  
FIDRES 0.125483 Hz  
AQ 3.9846387 sec  
RG 36  
DE 60.800 usec  
TE 294.2 K  
D1 1.00000000 sec  
TDO 1  
===== CHANNEL f1 =====  
NUC1 1H  
P1 14.83 usec  
PL 0.00 dB  
PL1 8.31434441 W  
SFO1 400.1324710 MHz  
SI 32768  
SF 400.1300096 MHz  
WDW EM  
SSB 0  
LB 0.30 Hz  
GB 0  
PC 1.00

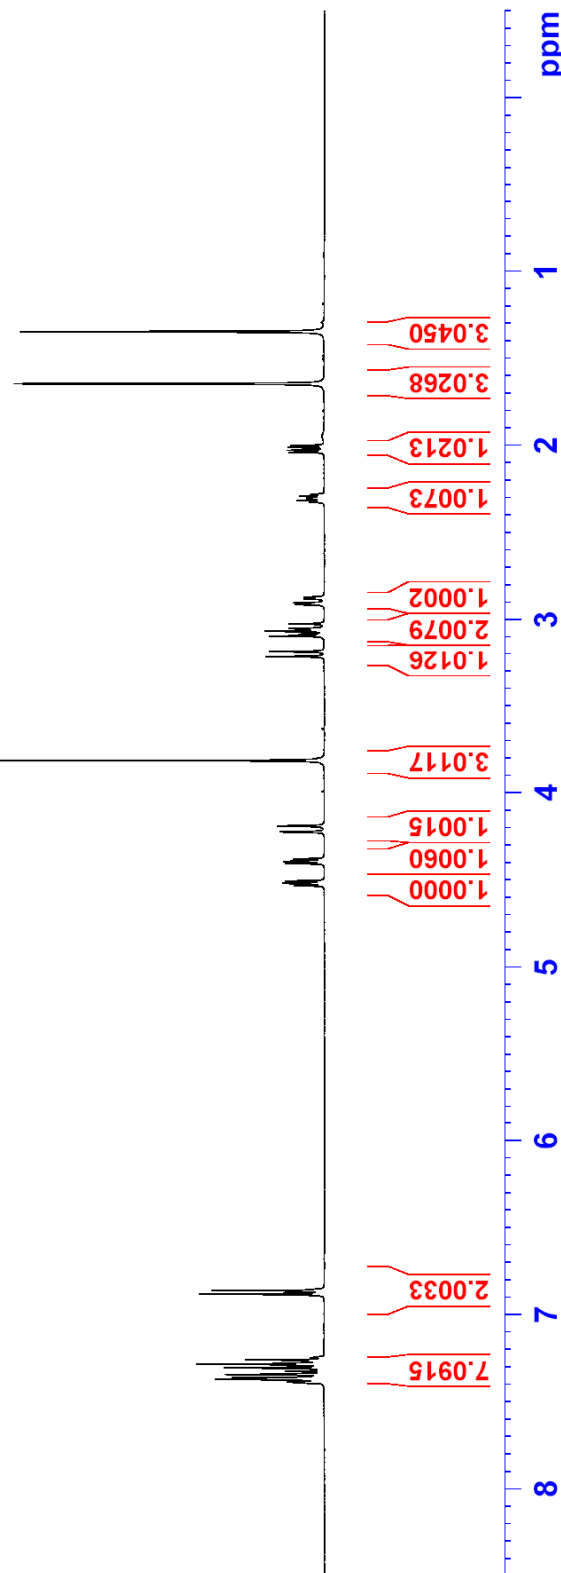

# <sup>13</sup>C NMR

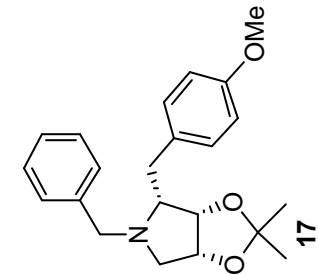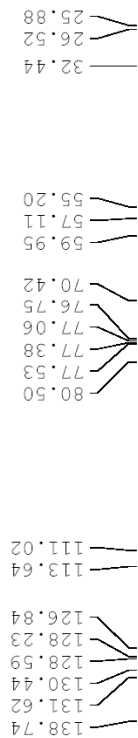

```

NAME          WKWD35_c13
EXPNO         1
PROCNO        2
Date_         20110514
Time_         17.42
INSTRUM       spect
PROBHD        5 mm PADUL 13C
PULPROG       zgpg30
TD            65536
SOLVENT       CDCl3
NS            415
DS            4
SWH           24038.461 Hz
FIDRES        0.366798 Hz
AQ            1.3631988 sec
RG            203
DW            20.800 usec
DE            6.50 usec
TE            294.4 K
D1            2.00000000 sec
D11           0.03000000 sec
TD0           1
  
```

```

===== CHANNEL f1 =====
NUC1          13C
P1            9.68 usec
PL1           -0.60 dB
PL1W          41.24164963 W
SFO1          100.6228298 MHz
  
```

```

===== CHANNEL f2 =====
CPDPRG2       waltz16
NUC2          1H
PCPD2         90.00 usec
PL2           0.00 dB
PL12          15.66 dB
PL13          15.92 dB
PL2W          8.31434441 W
PL12W         0.22585411 W
PL13W         0.21272963 W
SFO2          400.1316005 MHz
SI            32768
SF            100.6127735 MHz
WDW           EM
SSB           0
LB            1.00 Hz
GB            0
PC            1.40
  
```

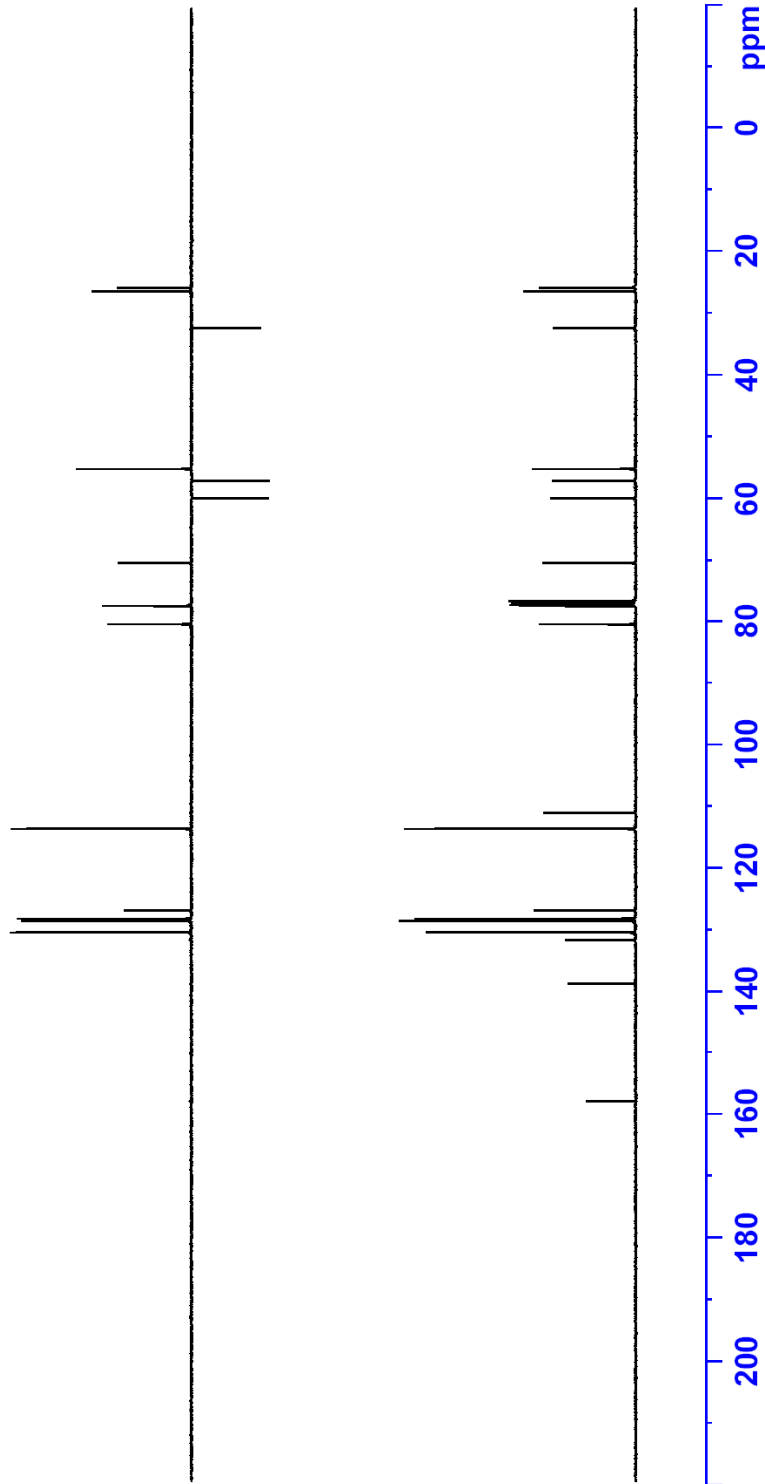

# <sup>1</sup>H NMR

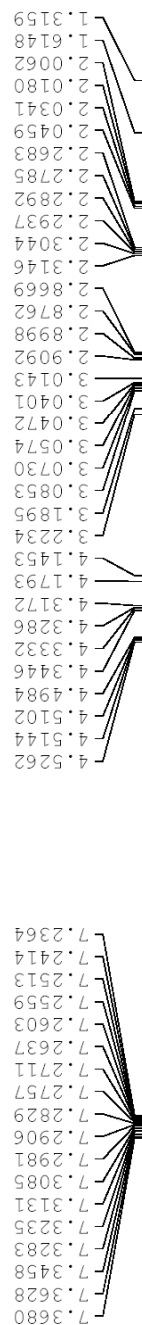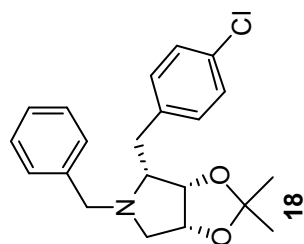

NAME: WKWD40  
 EXPNO: 1  
 PROCNO: 1  
 Date\_: 20100908  
 Time: 19.36  
 INSTRUM: spect  
 PROBHD: 5 mm PABBI 1H/  
 PULPROG: zg30  
 TD: 65536  
 SOLVENT: CDCl3  
 NS: 8  
 DS: 2  
 SWH: 8223.685 Hz  
 FIDRES: 0.125483 Hz  
 AQ: 3.9846387 sec  
 RG: 40.3  
 DW: 60.800 usec  
 DE: 6.50 usec  
 TE: 294.3 K  
 D1: 1.00000000 sec  
 TDO: 1  
 ===== CHANNEL f1 =====  
 NUC1: 1H  
 P1: 7.10 usec  
 PL1: -2.00 dB  
 FL1W: 13.17734718 W  
 SFOL: 400.1324710 MHz  
 SI: 32768  
 SF: 400.1300051 MHz  
 WDW: EM  
 SSB: 0  
 LB: 0.30 Hz  
 GB: 0  
 PC: 1.00

# <sup>13</sup>C NMR

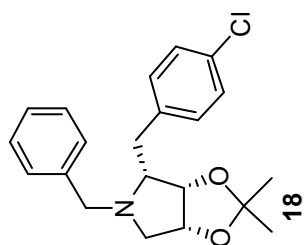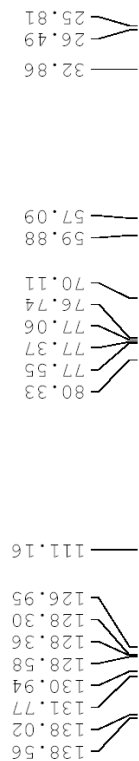

```

NAME          WKWD40_c13
EXPNO         1
PROCNO        1
Date_         20100908
Time_         19.55
INSTRUM       spect
PROBHD        5 mm PABBI 1H/
PULPROG       zgpg30
TD            65536
SOLVENT       CDCl3
NS            429
DS            4
SWH           24038.461 Hz
FIDRES        0.366798 Hz
AQ            1.3631988 sec
RG            203
DE            20.800 usec
TE            294.6 K
D1            2.00000000 sec
D11           0.03000000 sec
TD0           1

===== CHANNEL f1 =====
NUC1          13C
P1            14.50 usec
PL1           -4.00 dB
PL1W          90.22689819 W
SFO1          100.6228298 MHz

===== CHANNEL f2 =====
CPDPRG2       waltz16
NUC2          1H
PCPD2         80.00 usec
PL2           -2.00 dB
PL12          18.80 dB
PL13          18.80 dB
PL2W          13.17734718 W
PL12W         0.10960442 W
PL13W         0.10960442 W
SFO2          400.1316005 MHz
SI            32768
SF            100.6127676 MHz
WDW           EM
SSB           0
LB            1.00 Hz
GB            0
PC            1.40
  
```

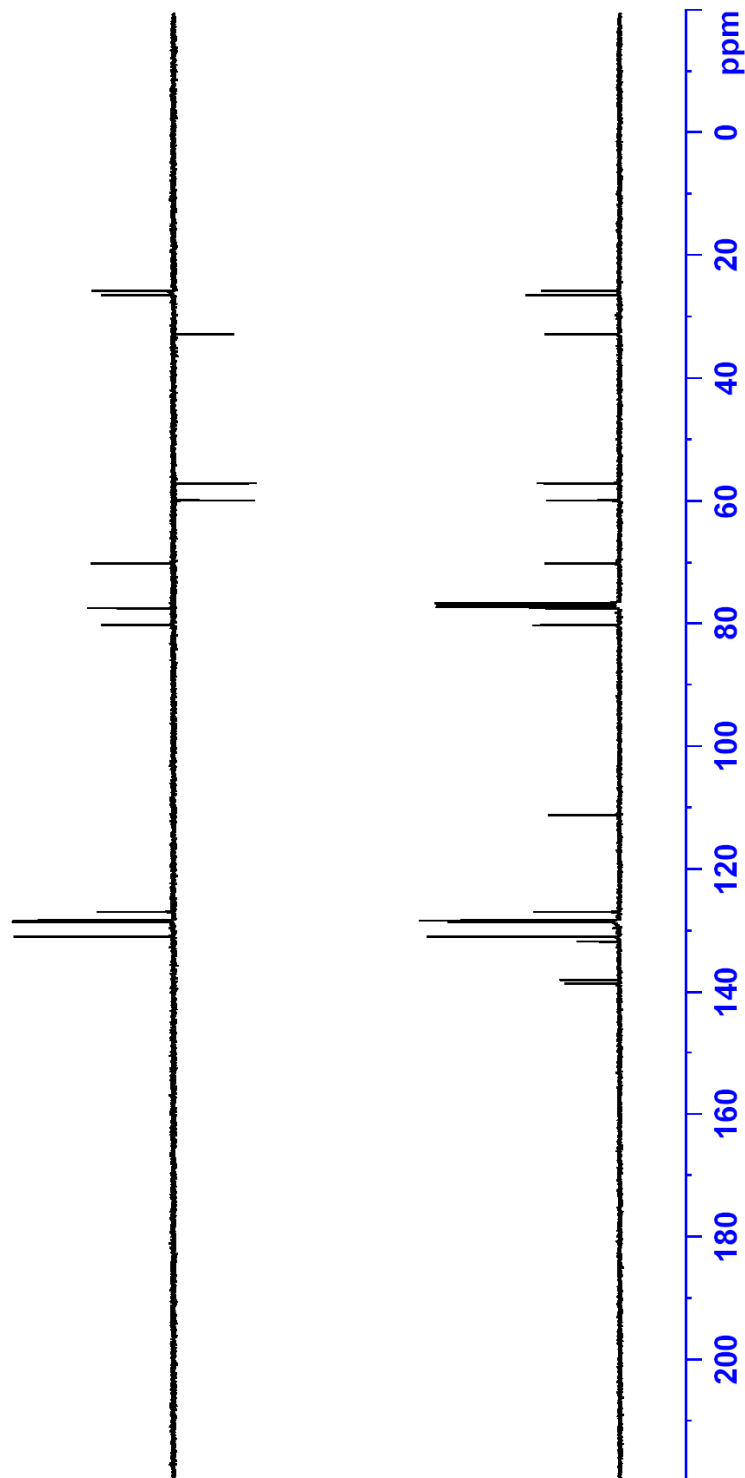

# <sup>1</sup>H NMR

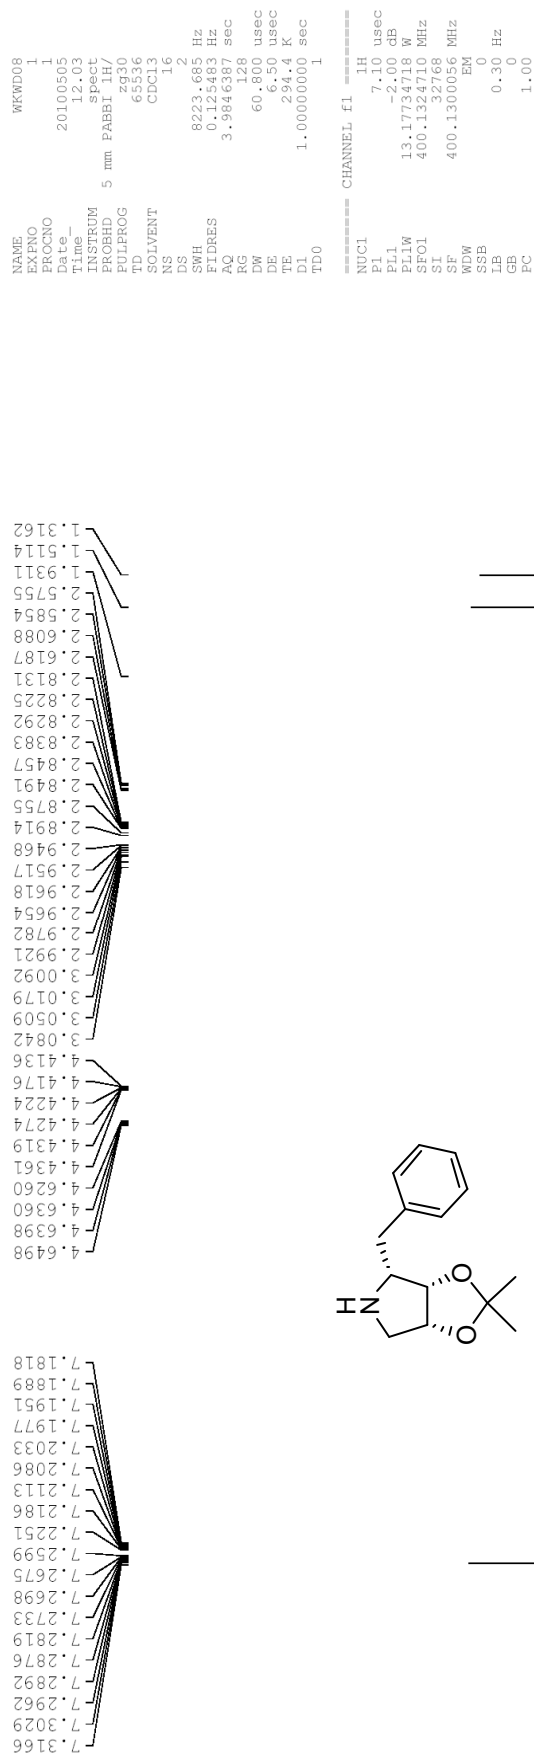



# <sup>13</sup>C NMR

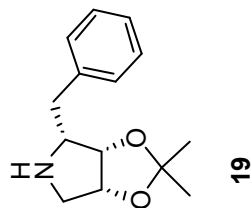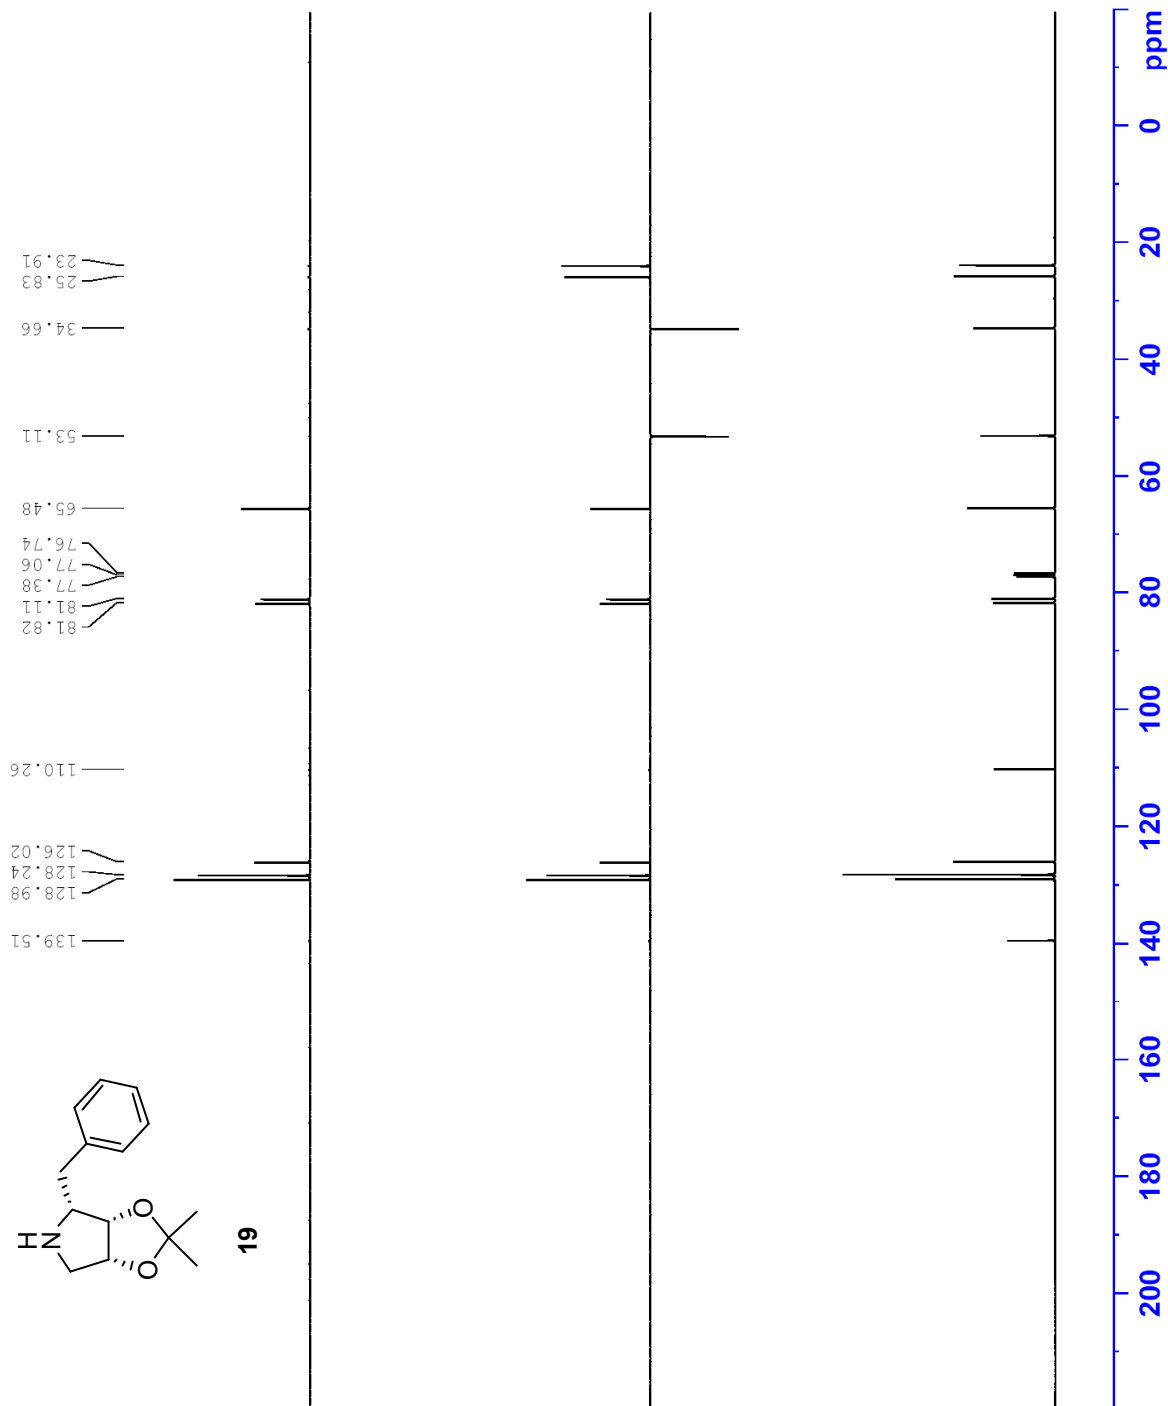

NAME WKWD07\_c13\_1  
 EXPNO 1  
 PROCNO 1  
 Date 20100906  
 Time 23.05  
 INSTRUM spect  
 PROBHD 5 mm PABBO BB-  
 PULPROG zgpg30  
 TD 65536  
 SOLVENT CDCl3  
 NS 9892  
 DS 4  
 SWH 24038.461 Hz  
 FIDRES 0.366798 Hz  
 AQ 1.3631988 sec  
 RG 90.5  
 DW 20.800 usec  
 DE 6.50 usec  
 TE 298.2 K  
 D1 2.00000000 sec  
 D11 0.03000000 sec  
 TD0 1

===== CHANNEL f1 =====  
 NUC1 13C  
 P1 9.90 usec  
 PL1 -2.00 dB  
 PL1W 55.33689459 W  
 SFO1 100.6379183 MHz

===== CHANNEL f2 =====  
 CPDPRG2 waltz16  
 NUC2 1H  
 P2 90.00 usec  
 PL2 -1.00 dB  
 PL12 15.16 dB  
 PL13 18.62 dB  
 PL2W 13.56617069 W  
 PL12W 0.32844096 W  
 PL13W 0.14806664 W  
 SFO2 400.1916008 MHz  
 SI 32768  
 SF 100.6278682 MHz  
 KDW EM  
 SSB 0  
 LB 1.00 Hz  
 GB 0  
 PC 1.40

# <sup>1</sup>H NMR

7.5309  
7.5262  
7.5217  
7.4513  
7.4469  
7.4330  
7.4302  
7.4172  
7.4135  
7.4088  
7.3973  
7.3768  
7.3533  
7.3502  
7.3471  
7.3365  
7.3317  
7.3269  
7.3164  
7.3134  
7.3104  
7.2603

4.6730  
4.6630  
4.6592  
4.6494  
4.4867  
4.4781  
4.4731  
4.4644  
3.1120  
3.0787  
3.0658  
3.0494  
3.0347  
3.0190  
3.0075  
3.0023  
2.9404  
2.9239  
2.8964  
2.8935  
2.8861  
2.8766  
2.8696  
2.8602  
2.6435  
2.6336  
2.6101  
2.6003  
2.0573  
1.5394  
1.3429

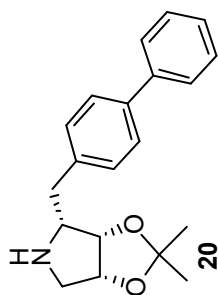

NAME WKWD46\_2  
EXPNO 1  
PROCNO 1  
Date\_ 20110507  
Time\_ 17.12  
INSTRUM spect  
PROBHD 5 mm PADUL 13C  
PULPROG zg30  
TD 65536  
SOLVENT CDCl3  
NS 4  
DS 2  
SWH 8223.685 Hz  
FIDRES 0.125483 Hz  
AQ 3.9846387 sec  
RG 80.6  
DW 60.800 usec  
DE 6.50 usec  
TE 294.2 K  
D1 1.00000000 sec  
TD0 1

===== CHANNEL f1 =====  
NUC1 1H  
P1 14.83 usec  
PL1 0.00 dB  
PL1W 8.31434441 W  
SFO1 400.1324710 MHz  
SI 32768  
SF 400.1300096 MHz  
WDW EM  
SSB 0  
LB 0.30 Hz  
GB 0  
PC 1.00

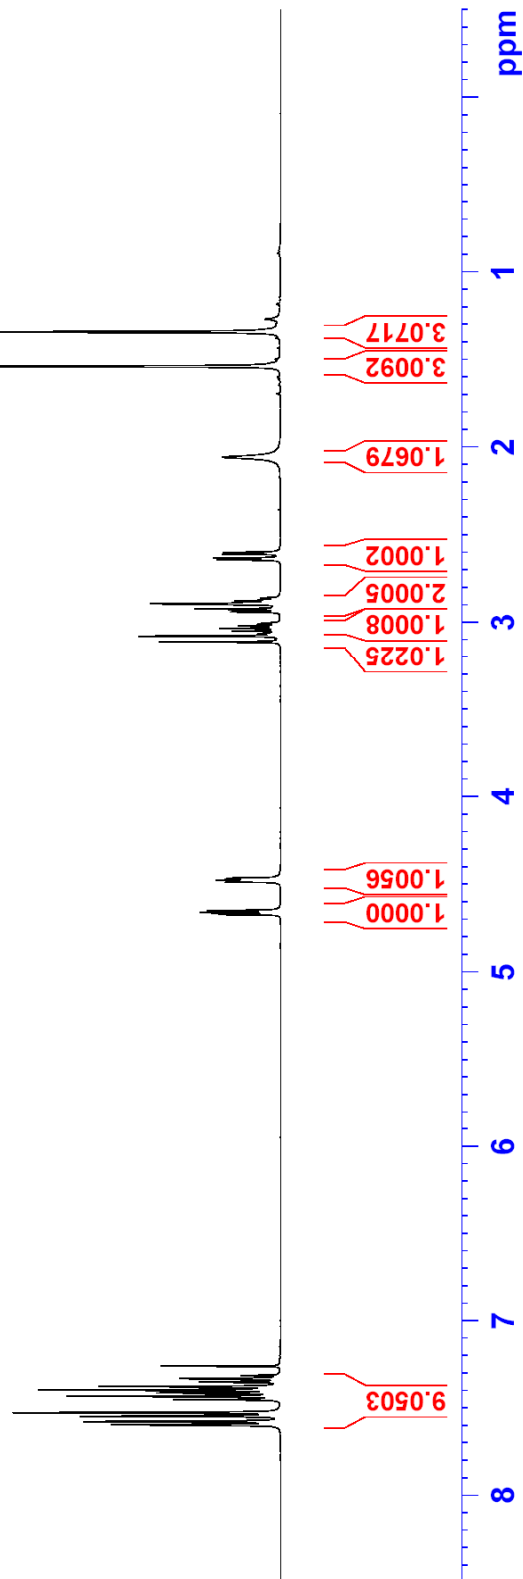

# <sup>13</sup>C NMR

141.10  
139.09  
138.76  
129.48  
128.71  
127.13  
127.03  
127.01  
110.43  
81.99  
81.33  
77.38  
77.06  
76.74  
65.58  
53.28  
34.45  
25.94  
24.02

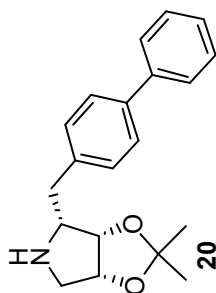

NAME WKWD46\_c13\_2  
EXPNO 1  
PROCNO 1  
Date\_ 20110507  
Time\_ 17.22  
INSTRUM spect  
PROBHD 5 mm PADUL 13C  
PULPROG zgpg30  
TD 65536  
SOLVENT CDCl3  
NS 676  
DS 4  
SWH 24038.461 Hz  
FIDRES 0.366798 Hz  
AQ 1.3631988 sec  
RG 203  
DW 20.800 usec  
DE 6.50 usec  
TE 294.6 K  
D1 2.00000000 sec  
D11 0.03000000 sec  
TD0 1

===== CHANNEL f1 =====  
NUC1 13C  
P1 9.68 usec  
PL1 -0.60 dB  
PL1W 41.24164963 W  
SFO1 100.6228298 MHz

===== CHANNEL f2 =====  
CPDPRG2 waltz16  
NUC2 1H  
PCPD2 90.00 usec  
PL2 0.00 dB  
PL12 15.66 dB  
PL13 15.92 dB  
PL2W 8.31434441 W  
PL12W 0.22585411 W  
PL13W 0.21272963 W  
SFO2 400.1316005 MHz  
SI 32768  
SF 100.6127712 MHz  
WDW EM  
SSB 0  
LB 1.00 Hz  
GB 0  
PC 1.40

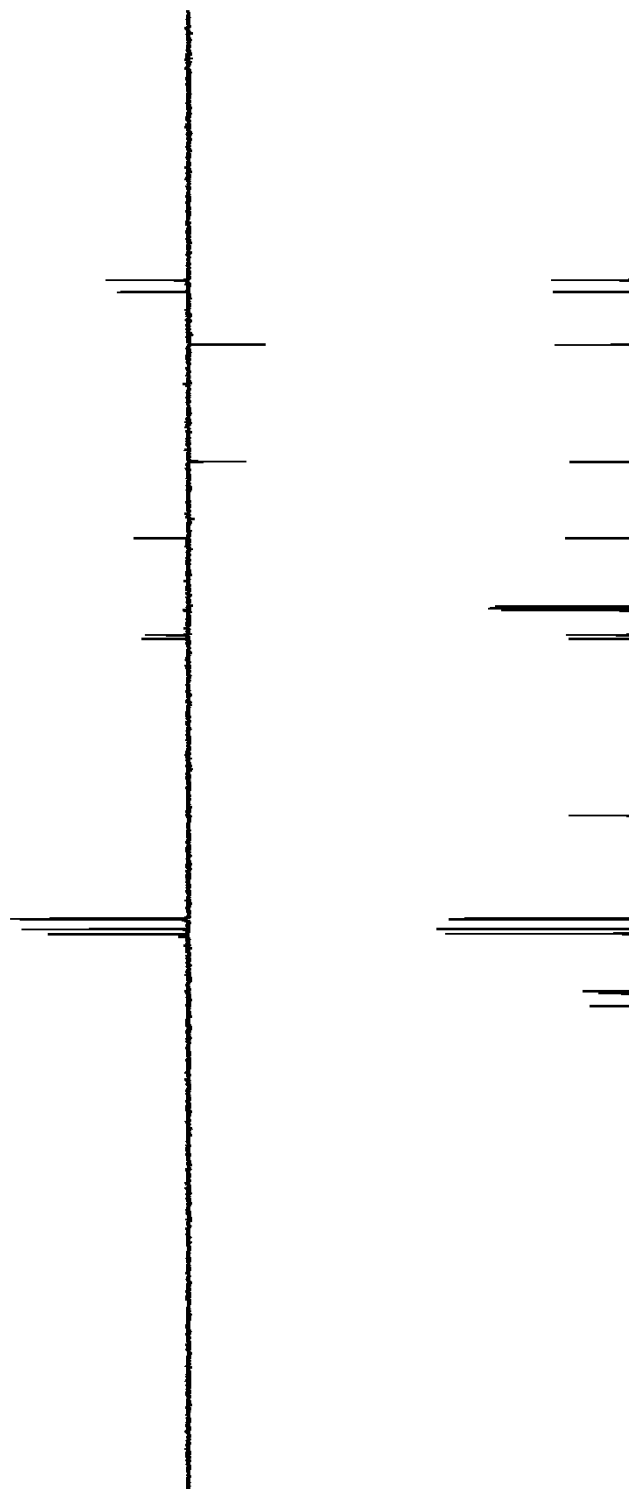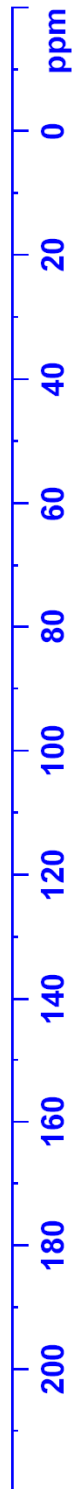

# <sup>1</sup>H NMR

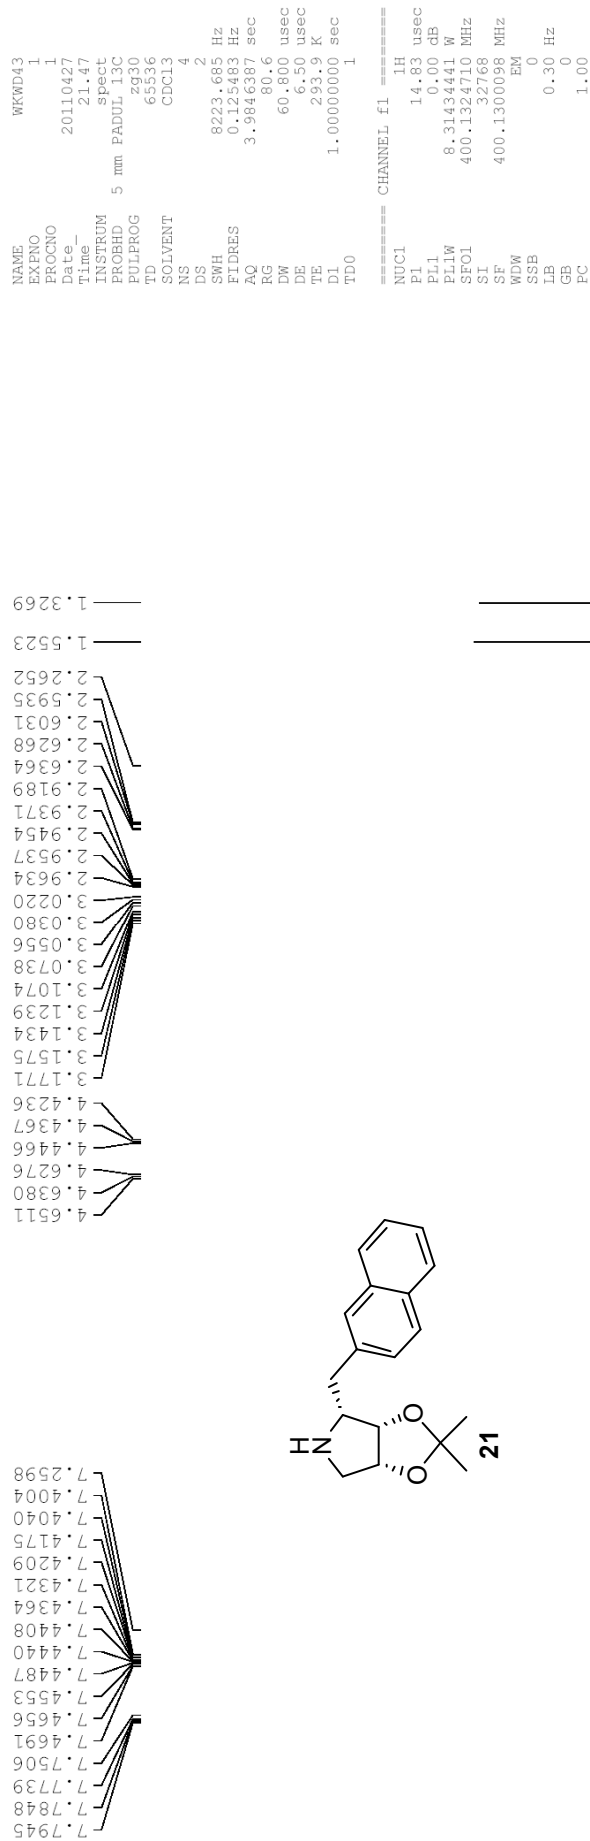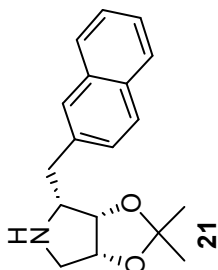

# <sup>13</sup>C NMR

```

NAME      WKWD43_c13
EXPNO     1
PROCNO    1
Date_     20110427
Time      21.54
INSTRUM   spect
PROBHD    5 mm PADUL 13C
PULPROG   zgpg30
TD         65536
SOLVENT   CDCl3
NS         203
DS         4
SWH        24038.461 Hz
FIDRES     0.366798 Hz
AQ         1.3631988 sec
RG         203
DW         20.800 usec
DE         6.50 usec
TE         294.4 K
D1         2.00000000 sec
D11        0.03000000 sec
TD0        1

===== CHANNEL f1 =====
NUC1       13C
P1         9.68 usec
PL1        -0.60 dB
PL1W       41.24164963 W
SFO1       100.6228298 MHz

===== CHANNEL f2 =====
CPDPRG2    waltz16
NUC2        1H
PCPD2      90.00 usec
PL2         0.00 dB
PL12       15.66 dB
PL13       15.92 dB
PL2W       8.31434441 W
PL12W      0.22585411 W
PL13W      0.21272963 W
SFO2       400.1316005 MHz
SI         32768
SF         100.6127712 MHz
WDW        EM
SSB         0
LB         1.00 Hz
GB         0
PC         1.40
  
```

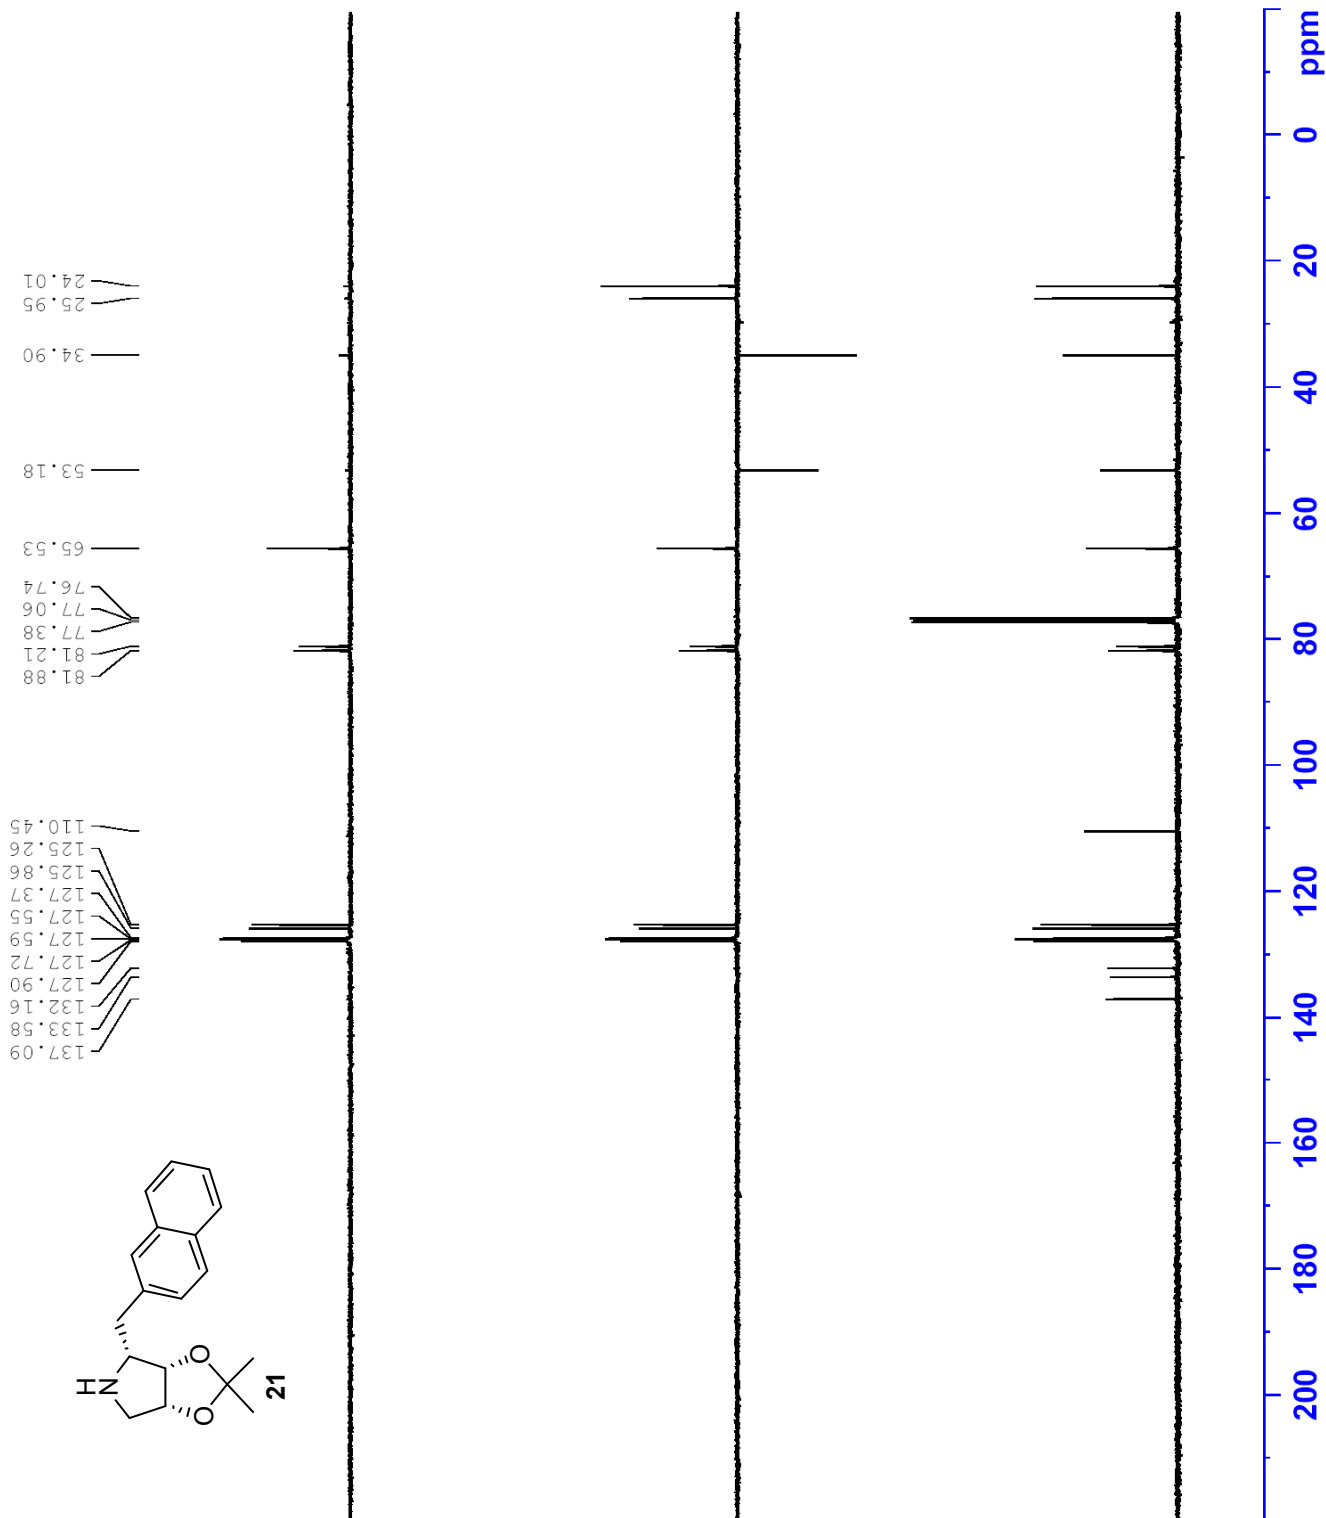

# <sup>1</sup>H NMR

4.6341  
4.6239  
4.6204  
4.6104  
4.4259  
4.4176  
4.4122  
4.4039  
3.0728  
3.0395  
2.9757  
2.9647  
2.9512  
2.9373  
2.9246  
2.9117  
2.8510  
2.8350  
2.8099  
2.7975  
2.7910  
2.7816  
2.6052  
2.5953  
2.5719  
2.5620  
2.3149  
2.1570  
1.5102  
1.3133

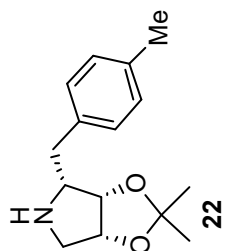

7.2601  
7.2022  
7.1823  
7.1074  
7.0878

NAME WKWD37\_3  
EXPNO 1  
PROCNO 1  
Date\_ 20100903  
Time 23.18  
INSTRUM spect  
PROBHD 5 mm PABBI 1H/  
PULPROG zg30  
TD 65536  
SOLVENT CDCl3  
NS 4  
DS 2  
SWH 8223.685 Hz  
FIDRES 0.125483 Hz  
AQ 3.9846387 sec  
RG 20.2  
DW 60.860 usec  
DE 6.50 usec  
TE 294.3 K  
D1 1.00000000 sec  
TD0 1  
===== CHANNEL f1 =====  
NUC1 1H  
P1 7.10 usec  
PL1 -2.00 dB  
PL1W 13.17734718 W  
SFO1 400.1324710 MHz  
SI 32768  
SF 400.1300051 MHz  
WDW EM  
SSB 0  
LB 0.30 Hz  
GB 0  
PC 1.00

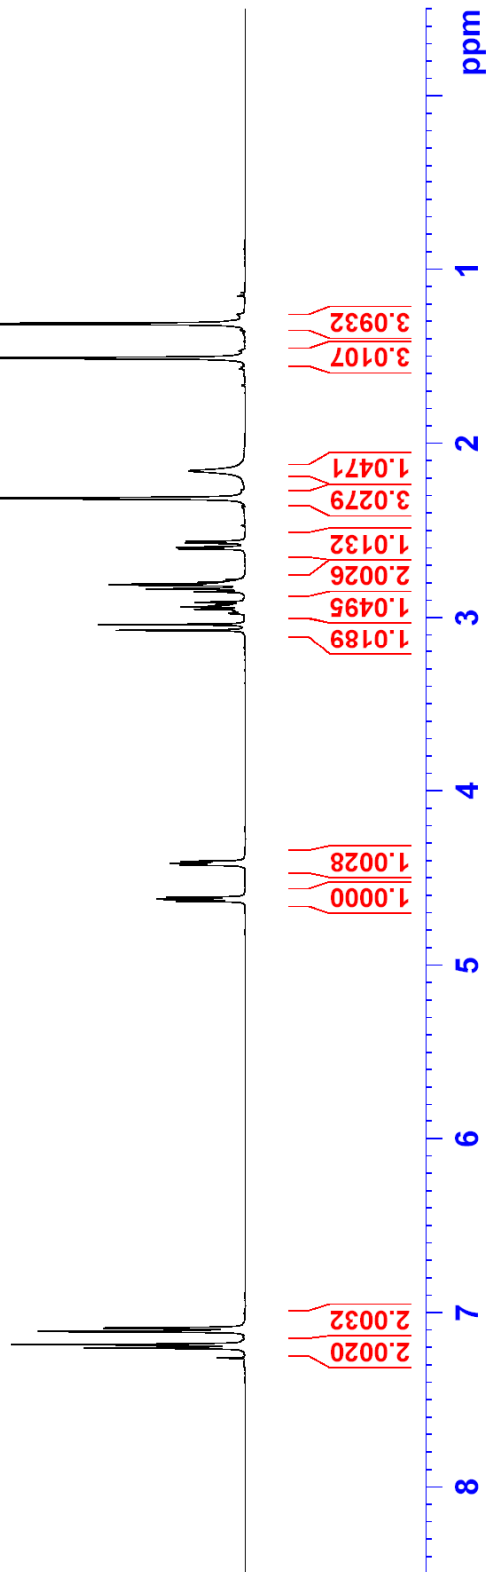

# <sup>13</sup>C NMR

```

NAME      WKWD37_c13_1
EXPNO     1
PROCNO    1
Date_     20100903
Time      23.32
INSTRUM   spect
PROBHD    5 mm PABBI 1H/
PULPROG   zgpg30
TD         65536
SOLVENT   CDCl3
NS         10782
DS         4
SWH        24038.461 Hz
FIDRES     0.366798 Hz
AQ         1.3631988 sec
RG         203
DW         20.800 usec
DE         6.50 usec
TE         294.4 K
D1         2.00000000 sec
D11        0.03000000 sec
TD0        1

===== CHANNEL f1 =====
NUC1       13C
P1         14.50 usec
PL1        -4.00 dB
PL1W       90.22689819 W
SFO1       100.6228298 MHz

===== CHANNEL f2 =====
CPDPRG2    waltz16
NUC2       1H
PCPD2      80.00 usec
PL2        -2.00 dB
PL12       18.80 dB
PL13       18.80 dB
PL1W       13.17734718 W
PL12W      0.10960442 W
PL13W      0.10960442 W
SFO2       400.1316005 MHz
SI         32768
SF         100.6127756 MHz
WDW        EM
SSB        0
LB         1.00 Hz
GB         0
PC         1.40

```

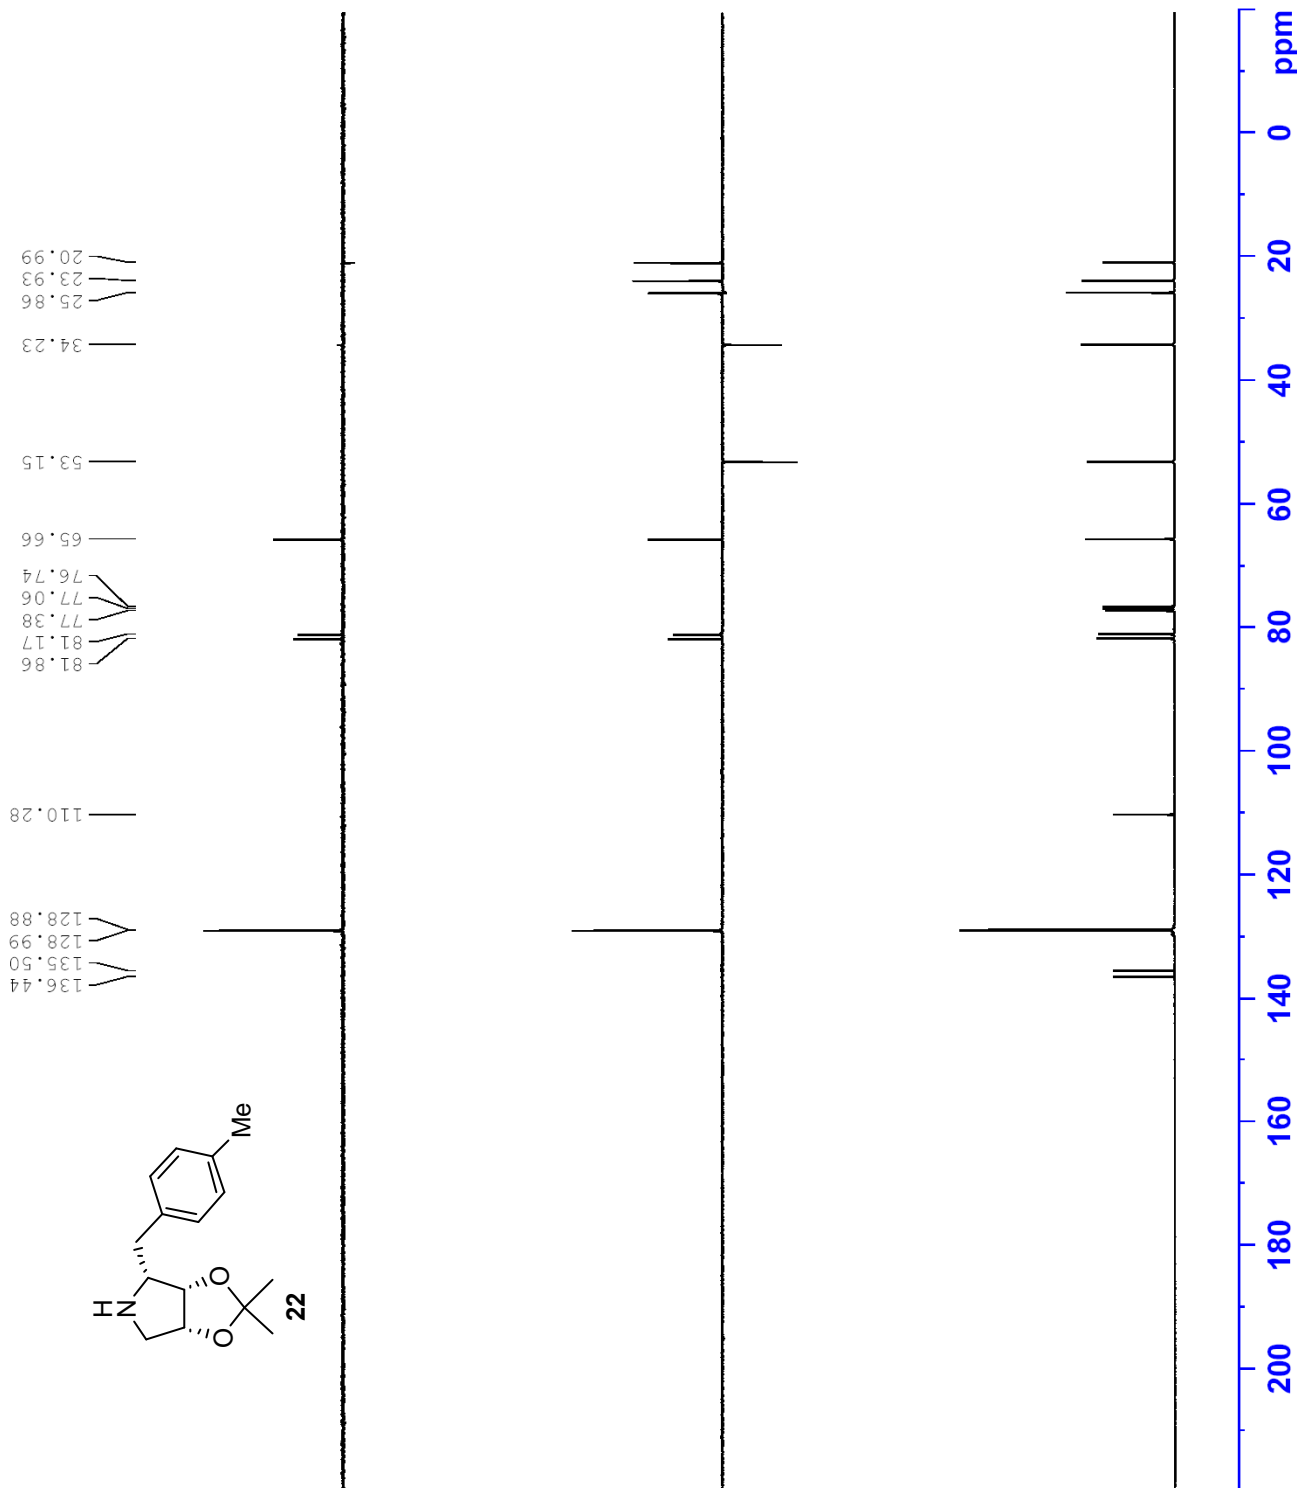

# <sup>1</sup>H NMR

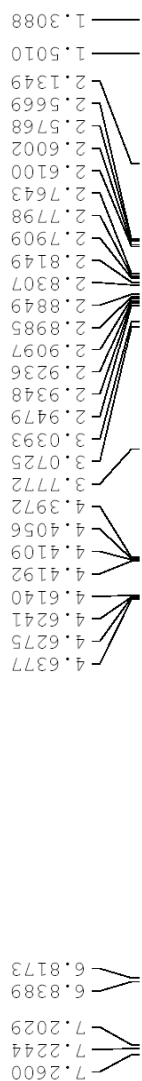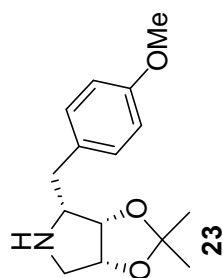

NAME WFW036\_1  
EXPNO 1  
PROCNO 1  
Date\_ 20110517  
Time\_ 19.27  
INSTRUM spect  
PROBHD 5 mm PABBO BB-  
PULPROG zg30  
TD 65536  
SOLVENT CDCl3  
NS 4  
DS 2  
SWH 8223.685 Hz  
FIDRES 0.125483 Hz  
AQ 3.9846387 sec  
RG 50.8  
DW 60.800 usec  
DE 6.50 usec  
TE 297.0 K  
D1 1.00000000 sec  
TD0 1

CHANNEL f1  
NUC1 1H  
P1 14.00 usec  
PL1 -1.00 dB  
PL1W 13.56617069 W  
SF01 400.1924713 MHz  
SI 32768  
SF 400.1900138 MHz  
WDW EM  
SSB 0  
LB 0.30 Hz  
GB 0  
PC 1.00



# <sup>13</sup>C NMR

```

NAME WKWD36_c13
EXPNO 1
PROCNO 1
Date_ 20110517
Time_ 19.43
INSTRUM spect
PROBHD 5 mm PABEO BB-
PULPROG zgpg30
TD 65536
SOLVENT CDCl3
NS 1146
DS 4
SWH 24038.461 Hz
FIDRES 0.366798 Hz
AQ 1.3631988 sec
RG 181
DW 20.800 usec
DE 6.50 usec
TE 297.5 K
D1 2.00000000 sec
D11 0.03000000 sec
TD0 1

===== CHANNEL f1 =====
NUC1 13C
P1 9.90 usec
PL1 -2.00 dB
PL1W 55.33689499 W
SFO1 100.6379183 MHz

===== CHANNEL f2 =====
CPDPRG2 waltz16
NUC2 1H
PCPD2 90.00 usec
PL2 -1.00 dB
PL12 15.16 dB
PL13 18.62 dB
PL2W 13.56617069 W
PL12W 0.32844096 W
PL13W 0.14806664 W
SFO2 400.1916008 MHz
SI 32768
SF 100.6278564 MHz
WDW EM
SSB 0
LB 1.00 Hz
GB 0
PC 1.40

```

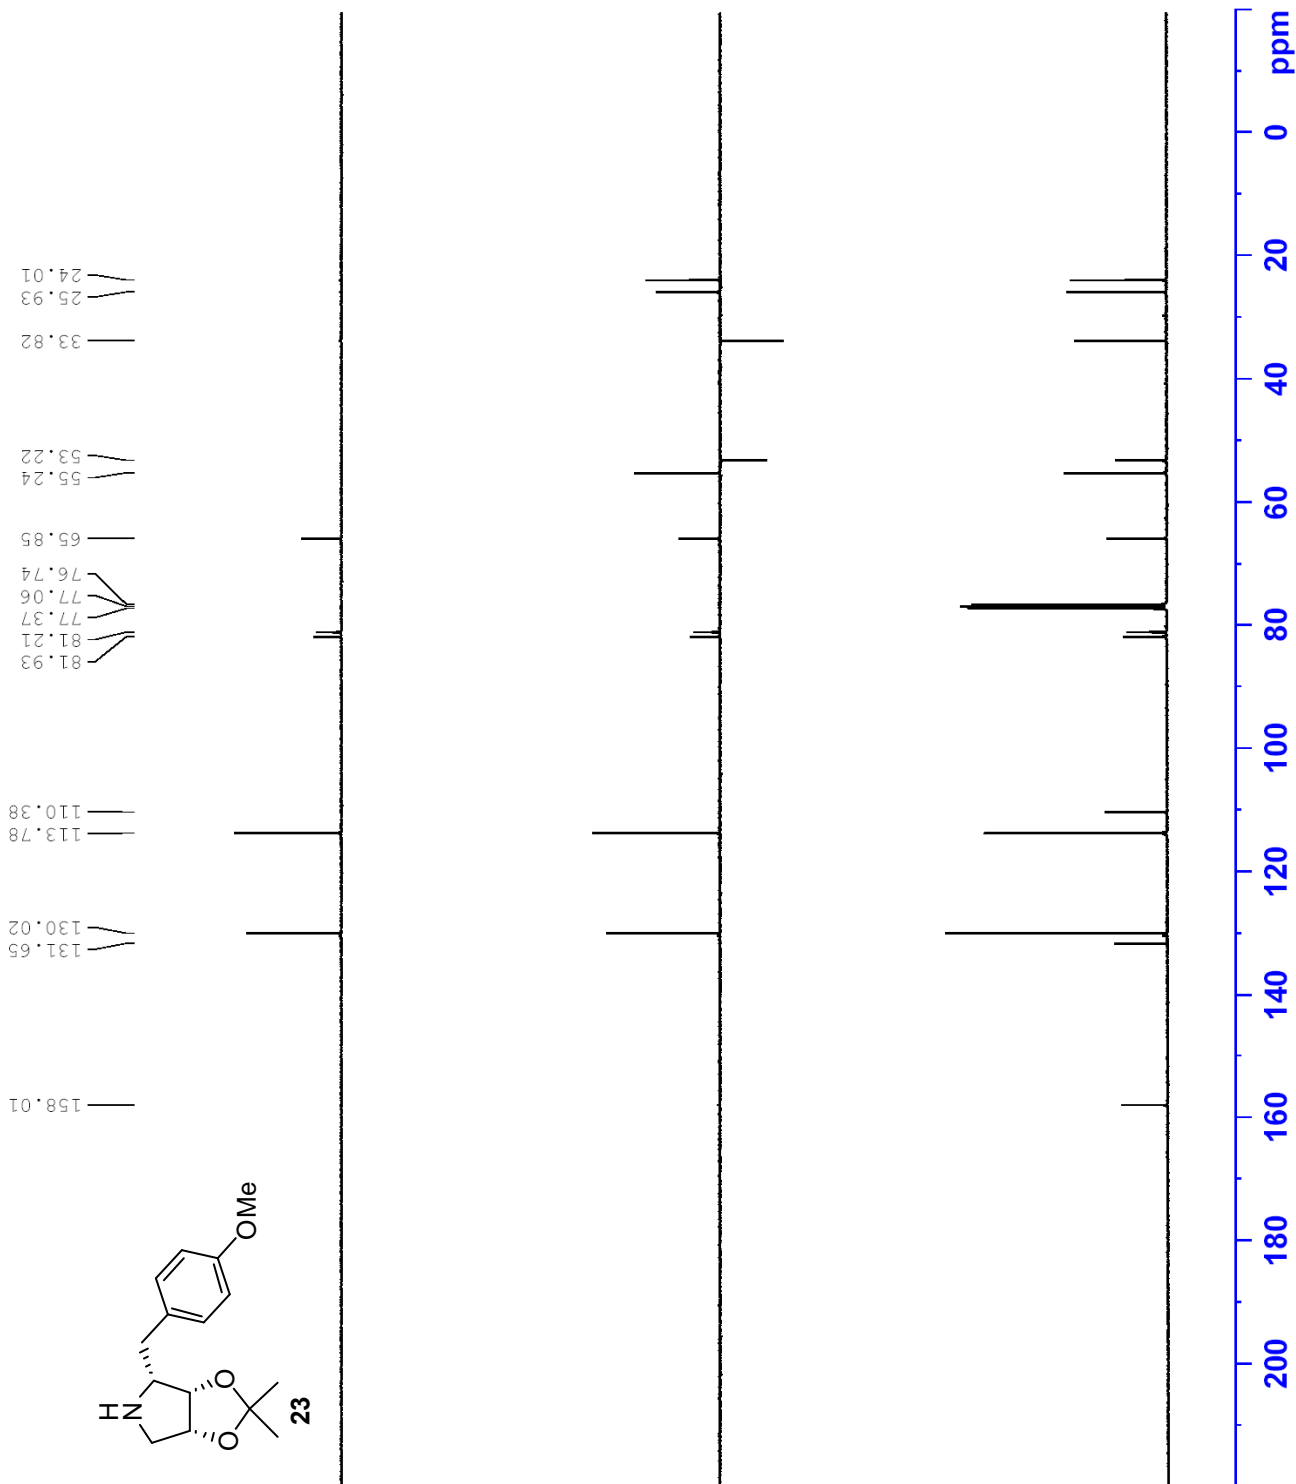

# <sup>1</sup>H NMR

NAME WKWD47\_2  
 EXNO 1  
 PROCNO 1  
 Date\_ 20110707  
 Time\_ 13.28  
 INSTRUM spect  
 PROBHD 5 mm PADUL 13C  
 PULPROG zg30  
 TD 65536  
 SOLVENT CDCl3  
 NS 16  
 DS 2  
 SWH 8223.685 Hz  
 FIDRES 0.125483 Hz  
 AQ 3.9846387 sec  
 RG 203  
 DW 60.800 usec  
 DE 6.50 usec  
 TE 294.7 K  
 D1 1.00000000 sec  
 TDO 1  
 ===== CHANNEL f1 =====  
 NUC1 1H  
 P1 14.83 usec  
 PL1 0.00 dB  
 PL1W 8.3143441 W  
 SFOL 400.1324710 MHz  
 SI 32768  
 SF 400.1300096 MHz  
 WDW EM  
 SSB 0  
 LB 0.30 Hz  
 GB 0  
 PC 1.00

1.3100  
 1.5018  
 1.8252  
 2.5764  
 2.5860  
 2.6098  
 2.6194  
 2.7732  
 2.7898  
 2.7984  
 2.8086  
 2.8157  
 2.8478  
 2.8635  
 2.9161  
 2.9345  
 2.9482  
 2.9668  
 3.0544  
 3.0877  
 3.3833  
 4.3825  
 4.3925  
 4.3966  
 4.4055  
 4.6312  
 4.6415  
 4.6439  
 4.6546

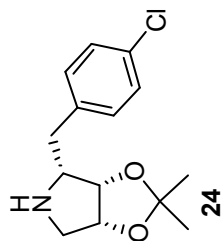

7.2602  
 7.2524  
 7.2454  
 7.2399  
 7.2329  
 7.2247  
 7.2176  
 7.2032

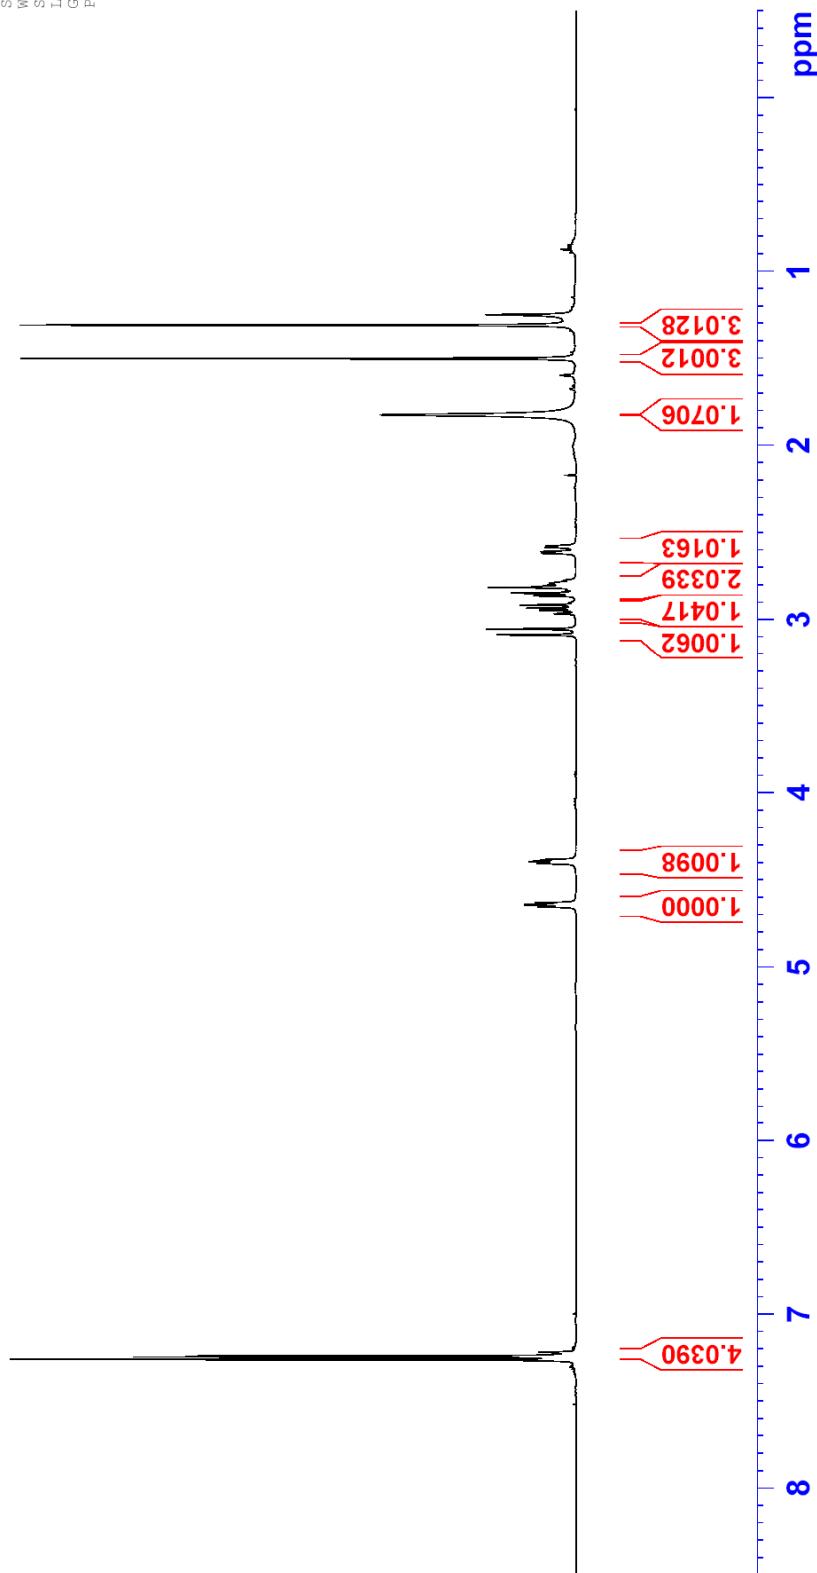

# <sup>13</sup>C NMR

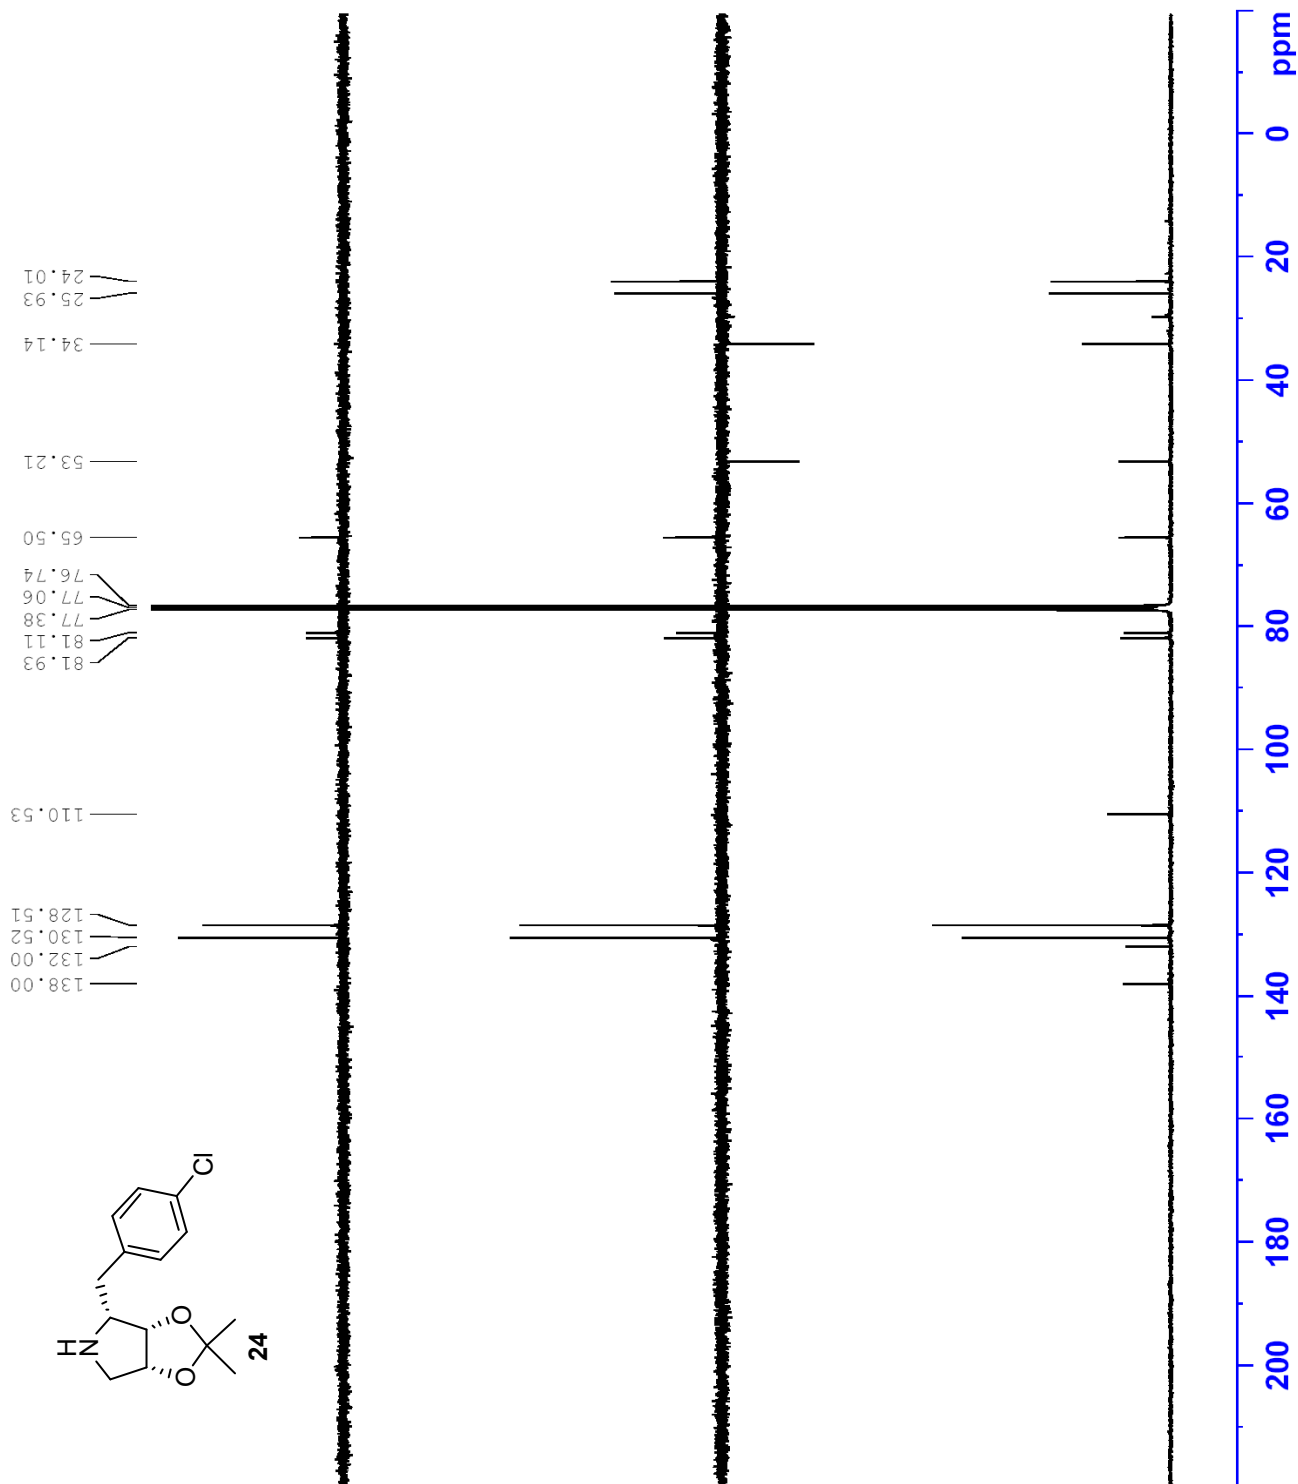

```

NAME          WKWD47_c13_1
EXPNO         1
PROCNO        1
Date_         20110708
Time_         22.44
INSTRUM       spect
PROBHD        5 mm PADUL 13C
PULPROG       zgpg30
TD            65536
SOLVENT       CDCl3
NS            10805
DS            4
SWH           24038.461 Hz
FIDRES        0.366798 Hz
AQ            1.3631988 sec
RG            203
DW            20.800 usec
DE            6.50 usec
TE            295.2 K
D1            2.00000000 sec
D11           0.03000000 sec
TD0           1

===== CHANNEL f1 =====
NUC1          13C
P1            9.68 usec
PL1           -0.60 dB
PL1W          41.24164963 W
SFO1          100.6228298 MHz

===== CHANNEL f2 =====
CPDPRG2       waltz16
NUC2          1H
PCPD2         90.00 usec
PL2           0.00 dB
PL12          15.66 dB
PL13          15.92 dB
PL1W          8.31434441 W
PL12W         0.22585411 W
PL13W         0.21272963 W
SFO2          400.1316005 MHz
SI            32768
SF            100.6127654 MHz
WDW           EM
SSB           0
LB            1.00 Hz
GB            0
PC            1.40
  
```

# <sup>1</sup>H NMR

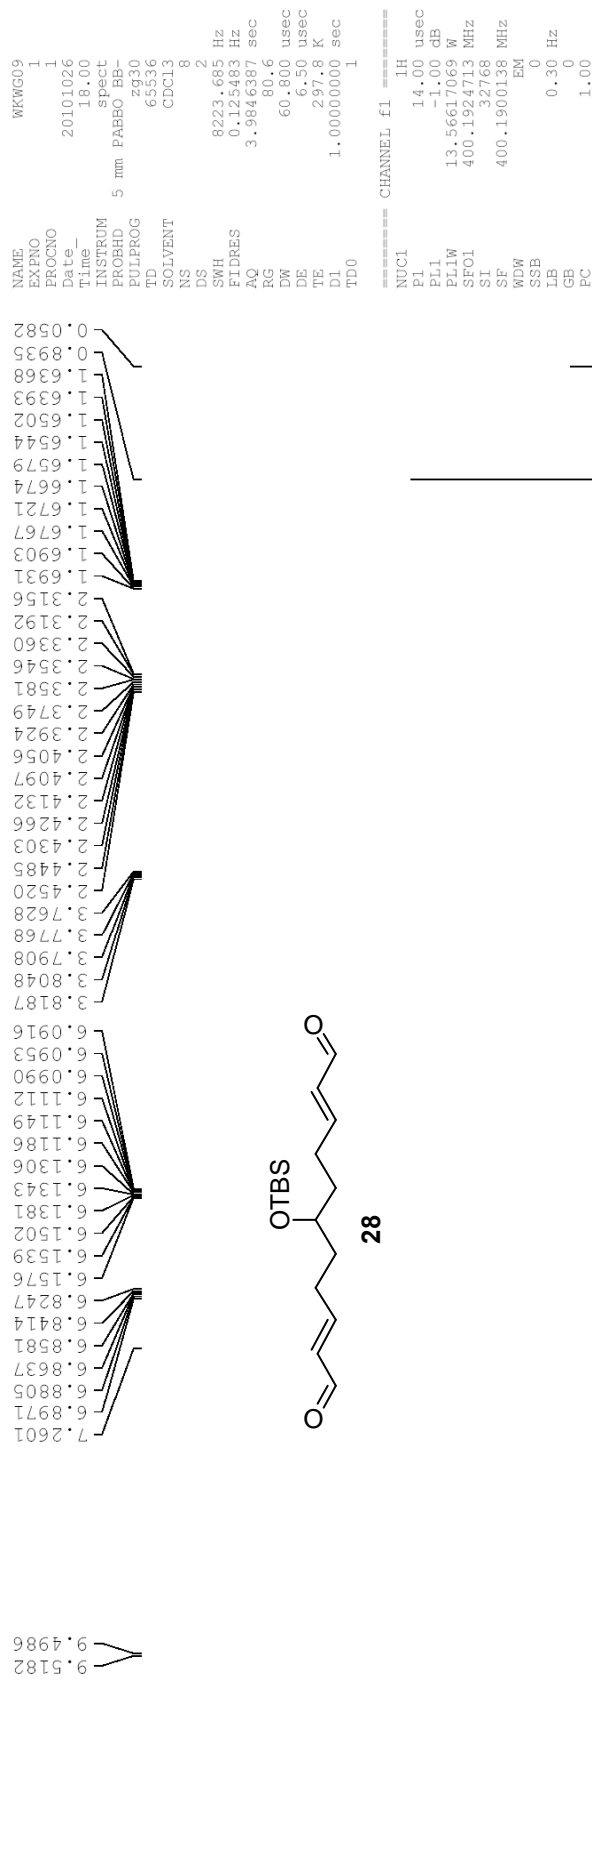

# <sup>13</sup>C NMR

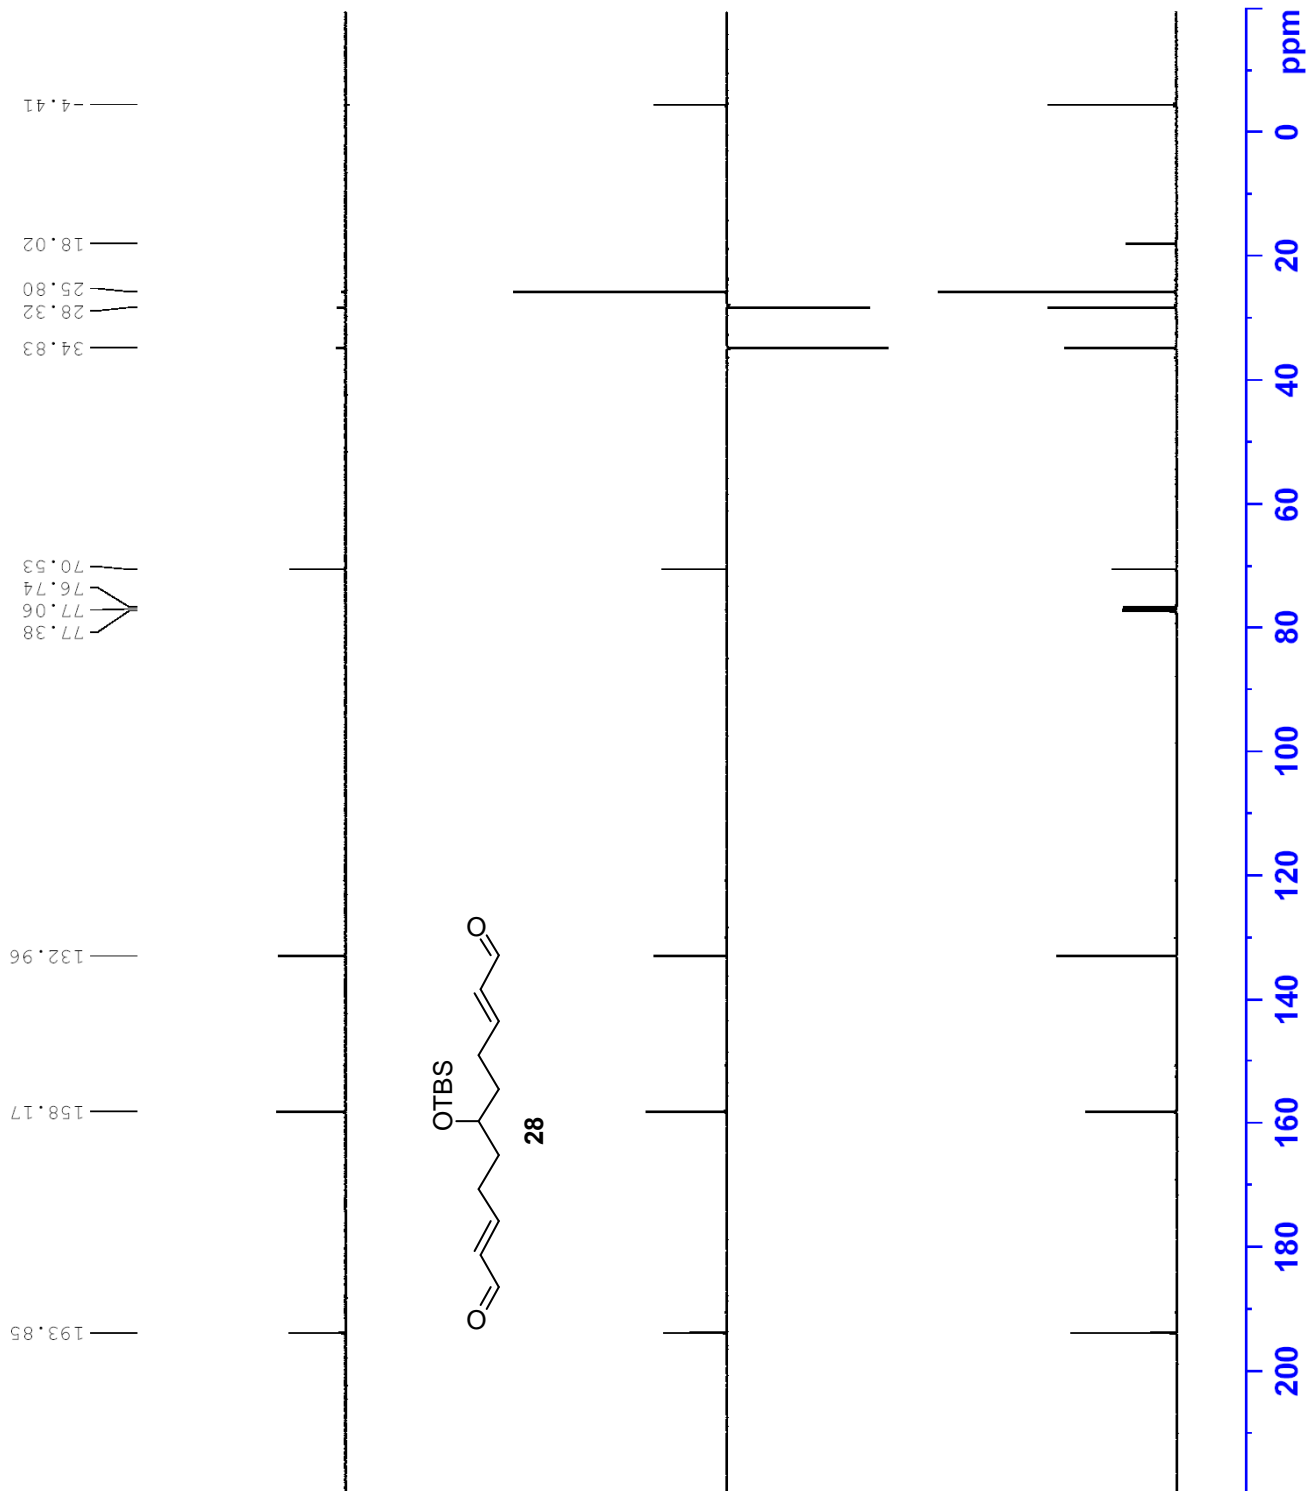

```

NAME      WRWG09_c13_1
EXPNO     1
PROCNO    1
Date_     20101216
Time      22.12
INSTRUM   spect
PROBHD    5 mm FAPBO BB-
PULPROG   zgpg30
TD        65536
SOLVENT   CDCl3
NS        440
DS        4
SWH       24038.461 Hz
FIDRES    0.366798 Hz
AQ        1.3631988 sec
RG        228
DW        20.800 usec
DE        6.50 usec
TE        299.3 K
D1        2.00000000 sec
D11       0.03000000 sec
TD0       1

===== CHANNEL f1 =====
NUC1      13C
P1        9.90 usec
PL1       -2.00 dB
PL1W      55.33689499 W
SFO1      100.6379183 MHz

===== CHANNEL f2 =====
CPDPRG2   waltz16
NUC2      1H
PCPD2     90.00 usec
PL2       -1.00 dB
PL12      15.16 dB
PL13      18.62 dB
PL2W      13.56617069 W
PL12W     0.32844096 W
PL13W     0.14806664 W
SFO2      400.1916008 MHz
SI        32768
SF        100.6278571 MHz
WDW       EM
SSB       0
LB        1.00 Hz
GB        0
PC        1.40

```

[illegible]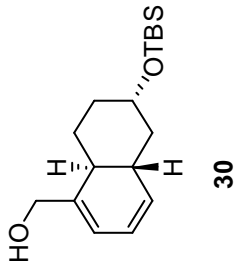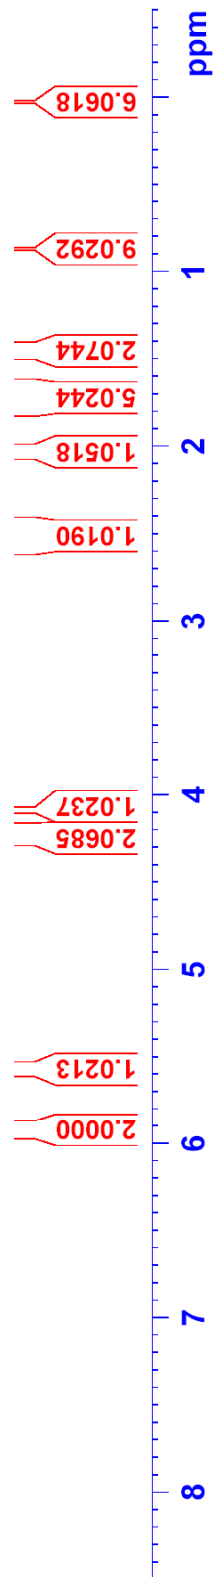

# <sup>13</sup>C NMR (Solvent: MeOD)

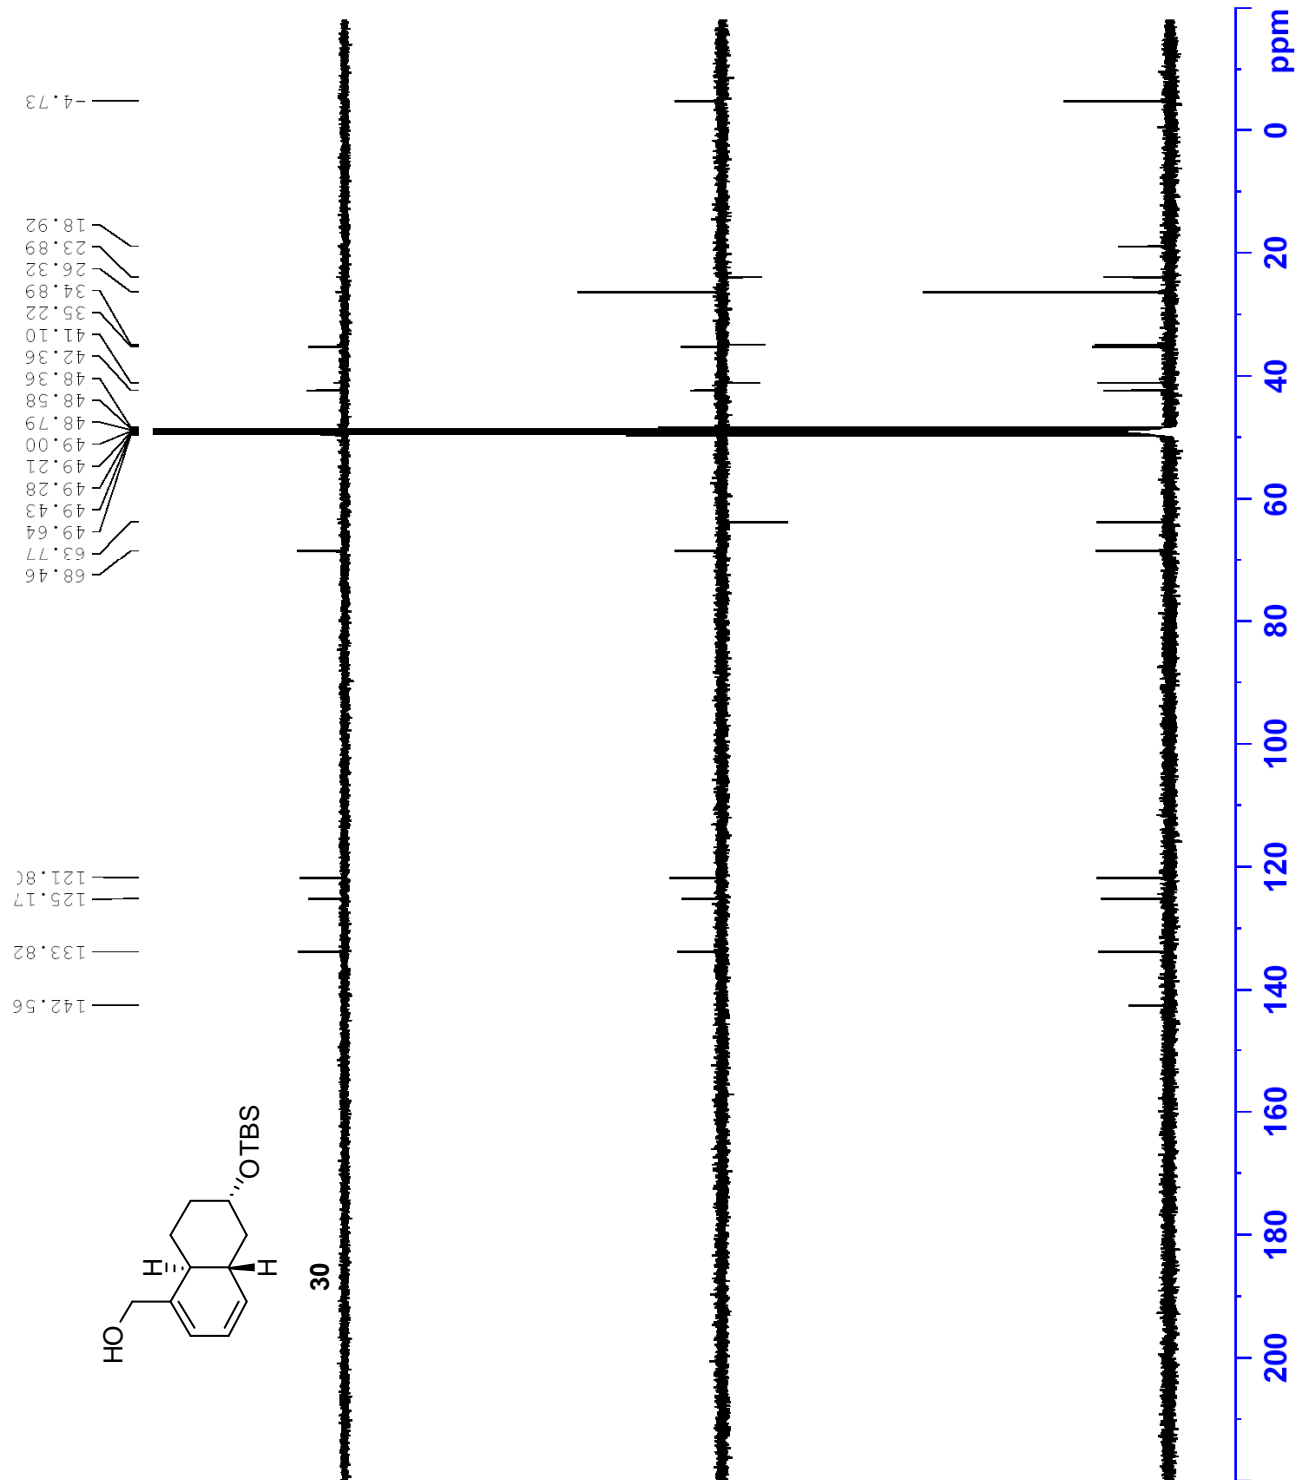

```

NAME WKWG12_c13 (MeOD)
EXPNO 1
PROCNO 1
Date_ 20101222
Time_ 19.40
INSTRUM spect
PROBHD 5 mm PADUL 13C
PULPROG zgpg30
TD 65536
SOLVENT MeOD
NS 874
DS 4
SWH 24038.461 Hz
FIDRES 0.366798 Hz
AQ 1.3631988 sec
RG 203
DE 20.800 usec
TE 6.50 usec
TD0 1
===== CHANNEL f1 =====
NUC1 13C
PL 9.68 usec
PL1 -0.60 dB
PL1W 41.24164963 W
SFO1 100.6228298 MHz
===== CHANNEL f2 =====
CPDPRG2 waltz16
NUC2 1H
PCPD2 90.00 usec
PL2 0.00 dB
PL12 15.66 dB
PL13 15.92 dB
PL2W 8.31434441 W
PL12W 0.22585411 W
PL13W 0.21272963 W
SFO2 400.1316005 MHz
SI 32768
SF 100.6126271 MHz
WDW EM
SSB 0
LB 1.00 Hz
GB 0
PC 1.40
  
```

# <sup>1</sup>H NMR

9.5232  
 9.5037  
 7.2602  
 6.9001  
 6.8836  
 6.8670  
 6.8611  
 6.8445  
 6.8280  
 6.1733  
 6.1699  
 6.1663  
 6.1538  
 6.1504  
 6.1469  
 6.1343  
 6.1307  
 6.1273  
 6.1148  
 6.1113  
 6.1078

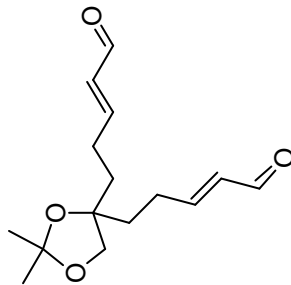

31

3.8156  
 2.4995  
 2.4958  
 2.4786  
 2.4604  
 2.4575  
 2.4433  
 2.4402  
 2.4375  
 2.4330  
 2.4193  
 2.4015  
 2.3876  
 2.3817  
 2.3787  
 2.3631  
 2.3457  
 2.3423  
 2.3256  
 2.3221  
 1.8058  
 1.7852  
 1.7644  
 1.4010

NAME WKWF32\_1  
 EXPNO 1  
 PROCNO 1  
 Date\_ 20110421  
 Time\_ 12.33  
 INSTRUM spect  
 PROBD 5 mm PABBO BB-  
 PULPROG zg30  
 TD 65536  
 SOLVENT CDCl3  
 NS 32  
 DS 2  
 SWH 8223.685 Hz  
 FIDRES 0.125483 Hz  
 AQ 3.9846387 sec  
 RG 101  
 DW 60.800 usec  
 DE 6.50 usec  
 TE 296.3 K  
 D1 1.00000000 sec  
 TD0 1  
 ===== CHANNEL f1 =====  
 NUC1 1H  
 P1 14.00 usec  
 PL1 -1.00 dB  
 PL1W 13.56617069 W  
 SFO1 400.1924713 MHz  
 SI 32768  
 SF 400.1900138 MHz  
 WDW EM  
 SSB 0  
 LB 0.30 Hz  
 GB 0  
 PC 1.00

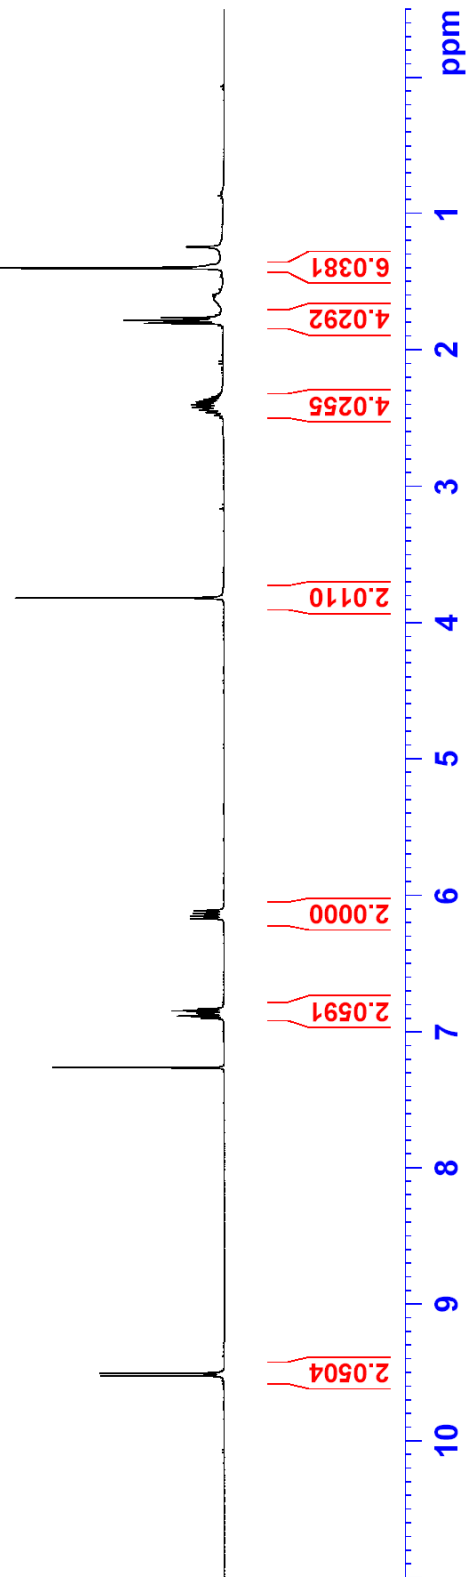



# <sup>13</sup>C NMR

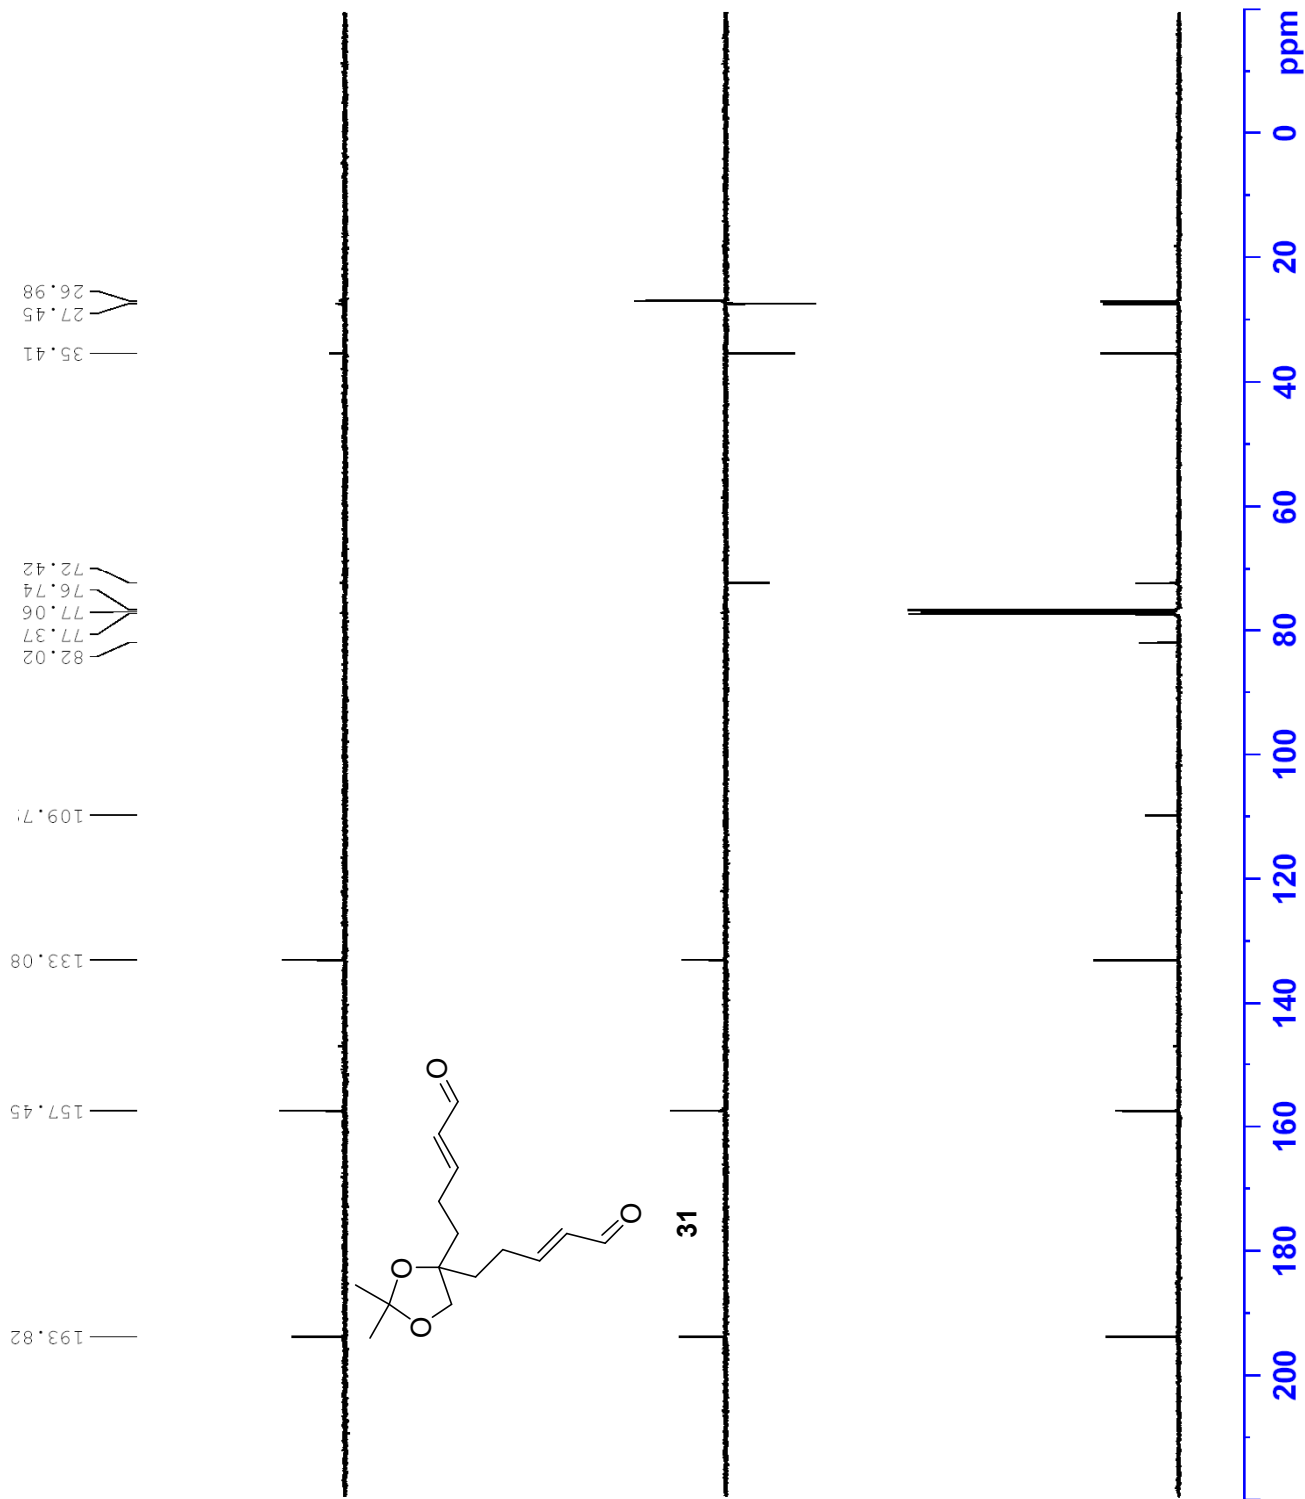

```

NAME WKWF32_c13
EXPNO 1
PROCNO 1
Date_ 20110416
Time_ 11.00
INSTRUM spect
PROBHD 5 mm PADUL 13C
PULPROG zgpg30
TD 65536
SOLVENT CDCl3
NS 503
DS 4
SWH 24038.461 Hz
FIDRES 0.366798 Hz
AQ 1.3631988 sec
RG 203
DW 20.800 usec
DE 6.50 usec
TE 294.7 K
D1 2.00000000 sec
D11 0.03000000 sec
TD0 1

===== CHANNEL f1 =====
NUC1 13C
P1 9.68 usec
PL1 -0.60 dB
PL1W 41.24164963 W
SFO1 100.6228298 MHz

===== CHANNEL f2 =====
CPDPRG2 waltz16
NUC2 1H
PCPD2 90.00 usec
PL2 0.00 dB
PL12 15.66 dB
PL13 15.92 dB
PL2W 8.31434441 W
PL12W 0.22585411 W
PL13W 0.21272963 W
SFO2 400.1316005 MHz
SI 32768
SF 100.6127669 MHz
WDW EM
SSB 0
LB 1.00 Hz
GB 0
PC 1.40

```

# <sup>1</sup>H NMR

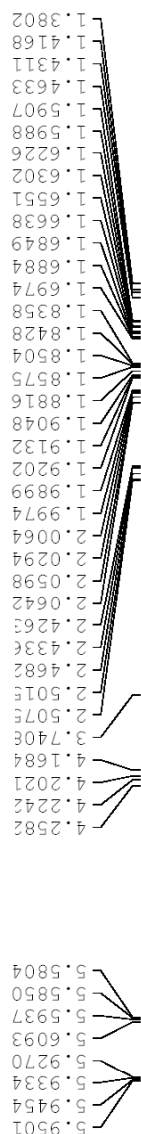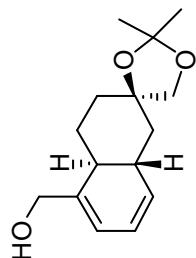

33

NAME WKWF34\_2  
EXPNO 1  
PROCNO 1  
Date\_ 20110722  
Time\_ 22.10  
INSTRUM spect  
PROBHD 5 mm PADUL 13C  
PULPROG zg30  
TD 65536  
SOLVENT CDCl3  
NS 16  
DS 2  
SWH 8223.685 Hz  
FIDRES 0.125483 Hz  
AQ 3.9846387 sec  
RG 203  
DW 60.800 usec  
DE 6.50 usec  
TE 673.2 K  
D1 1.0000000 sec  
TD0 1

CHANNEL f1  
NUC1 1H  
P1 14.83 usec  
PL1 0.00 dB  
PL1W 8.3143441 W  
SF01 400.1324710 MHz  
SI 32768  
SF 400.1300096 MHz  
WDW EM  
SSB 0  
LB 0.30 Hz  
GB 0  
PC 1.00

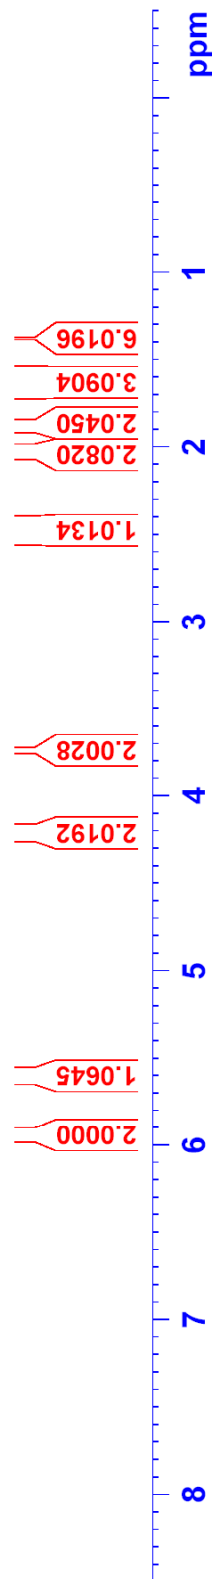

**<sup>13</sup>C NMR**

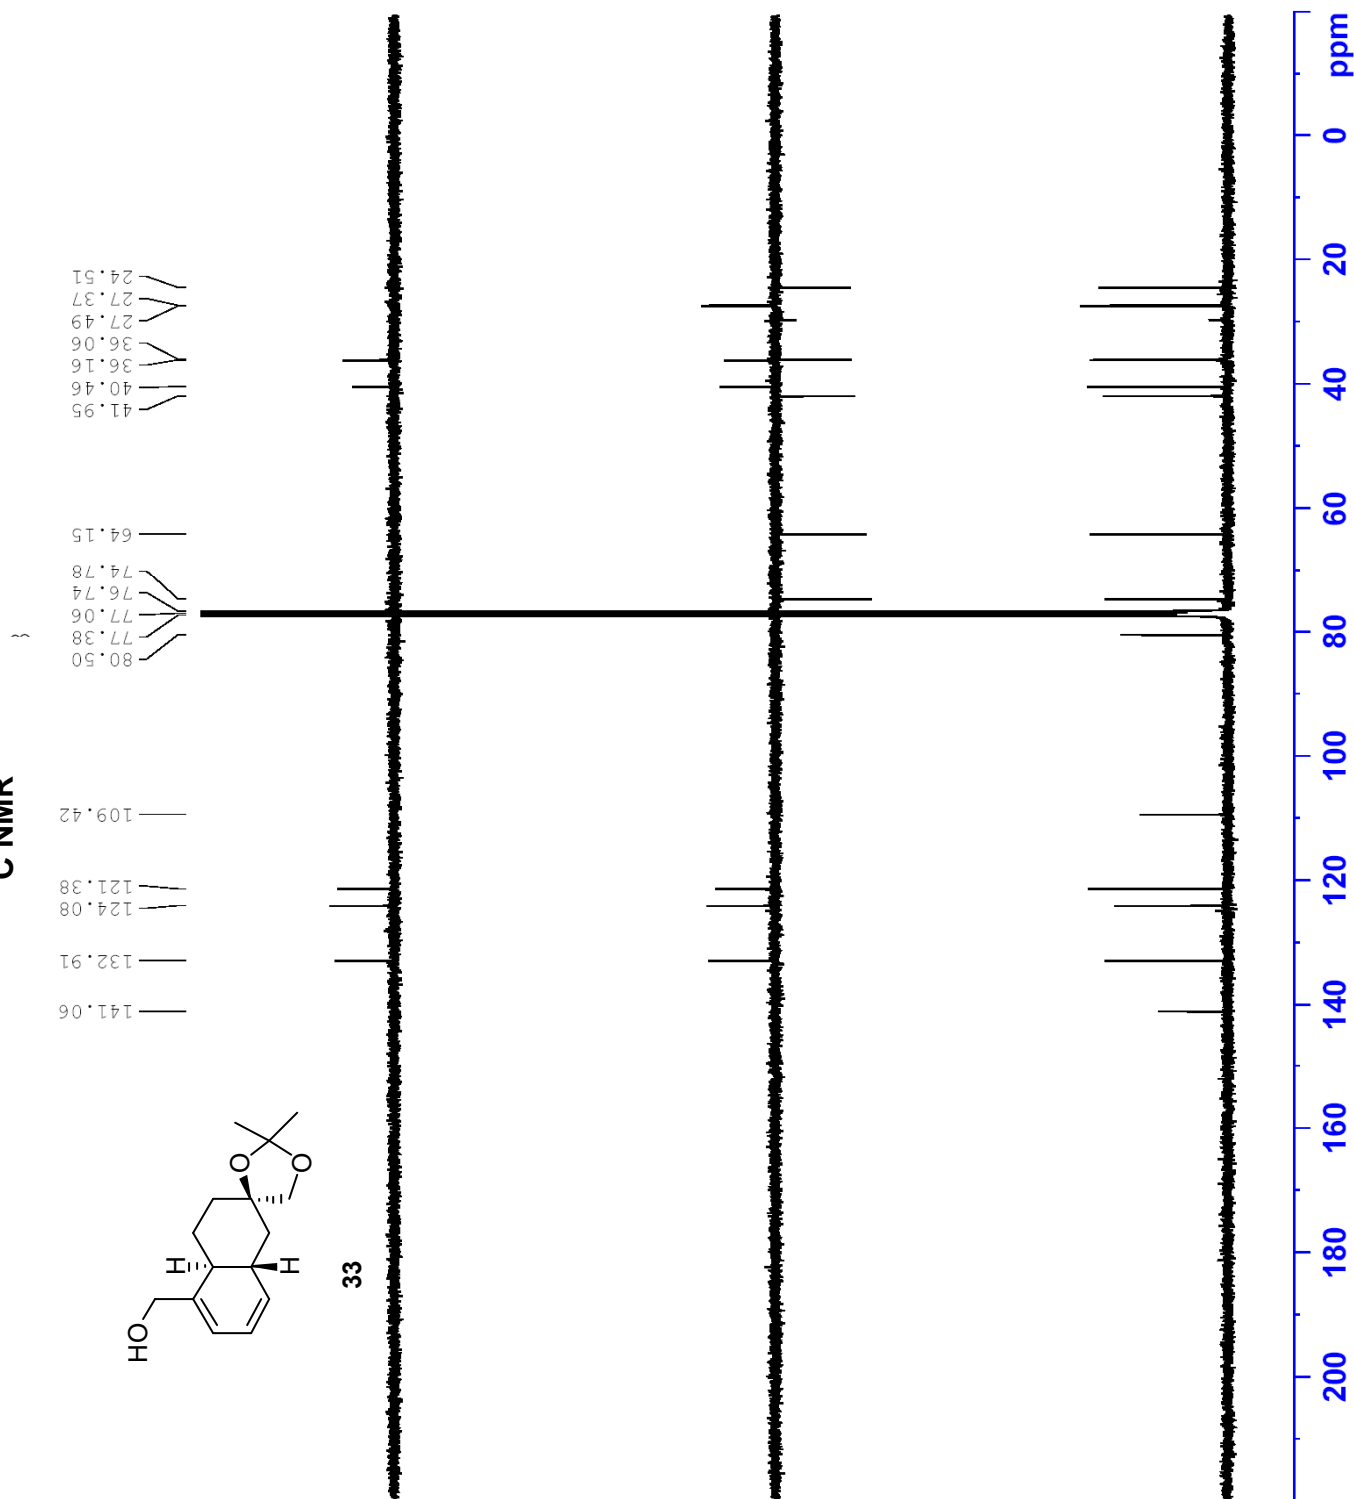

```
NAME          WKWF34_c13
EXPNO          1
PROCNO         1
Date_          20110427
Time_          23.02
INSTRUM        spect
PROBHD         5 mm PADUL 13C
PULPROG        zgpg30
TD             65536
SOLVENT        CDCl3
NS             10980
DS             4
SWH            24038.461 Hz
FIDRES         0.366798 Hz
AQ            1.3631988 sec
RG            203
DW            20.800 usec
DE            6.50 usec
TE            294.8 K
D1            2.0000000 sec
D11           0.03000000 sec
TD0           1

===== CHANNEL f1 =====
NUC1           13C
P1            9.68 usec
PL1           -0.60 dB
PL1W          41.24164963 W
SFO1          100.6228298 MHz

===== CHANNEL f2 =====
CPDPRG2       waltz16
NUC2           1H
PCPD2         90.00 usec
PL2           0.00 dB
PL12          15.66 dB
PL13          15.92 dB
PL1W          8.31434441 W
PL12W         0.22585411 W
PL13W         0.21272963 W
SFO2          400.1316005 MHz
SI            32768
SF           100.6127646 MHz
WDW           EM
SSB           0
LB            1.00 Hz
GB            0
PC            1.40
```

# <sup>1</sup>H NMR

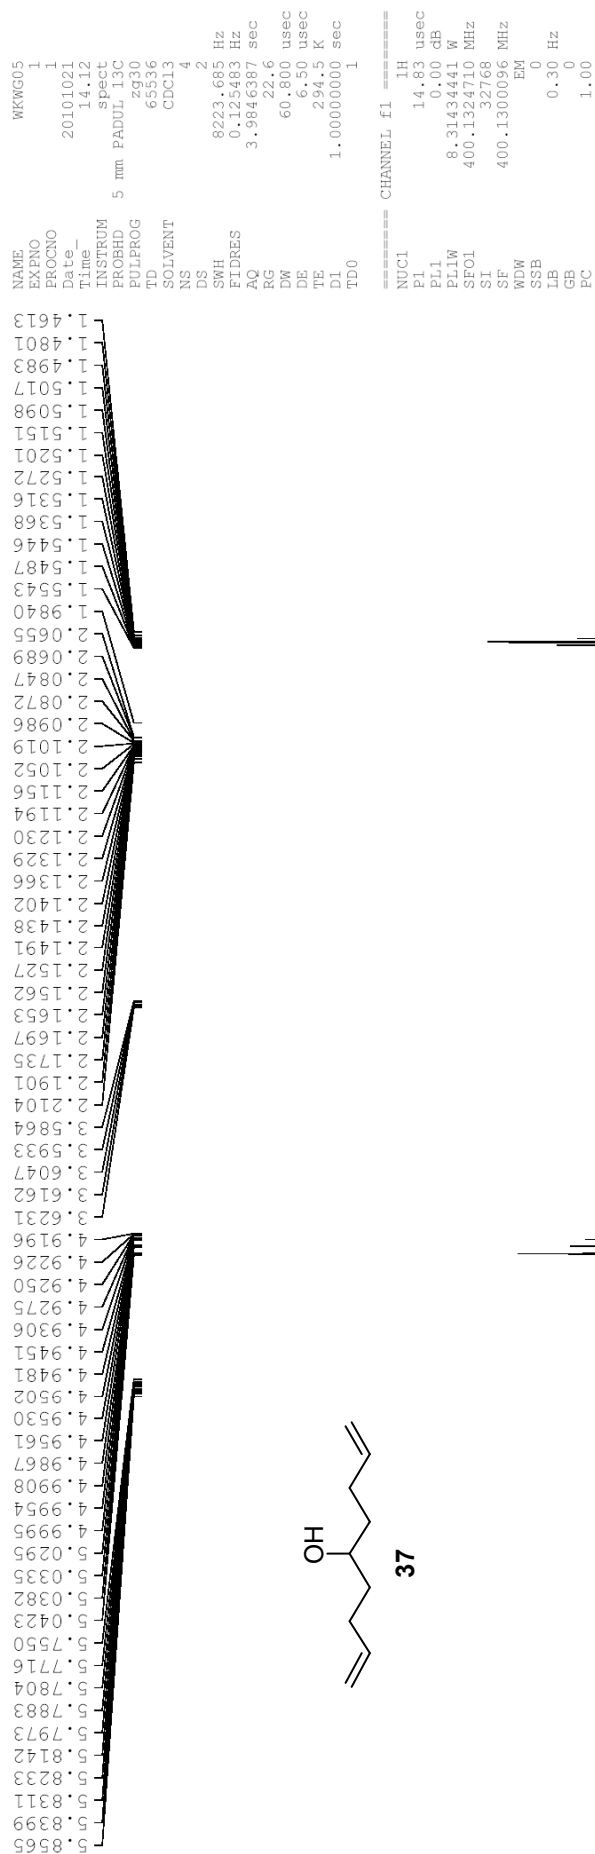

# <sup>13</sup>C NMR

NAME WKWG05\_c13  
 EXPNO 1  
 PROCNO 1  
 Date\_ 20101021  
 Time\_ 14.18  
 INSTRUM spect  
 PROBHD 5 mm PADUL 13C  
 PULPROG zgpg30  
 TD 65536  
 SOLVENT CDCl3  
 NS 89  
 DS 4  
 SWH 24038.461 Hz  
 FIDRES 0.366798 Hz  
 AQ 1.3631988 sec  
 RG 203  
 DW 20.800 usec  
 DE 6.50 usec  
 TE 295.0 K  
 D1 2.00000000 sec  
 D11 0.03000000 sec  
 TD0 1

===== CHANNEL f1 =====  
 NUC1 13C  
 P1 9.68 usec  
 PL1 -0.60 dB  
 PL1W 41.24164963 W  
 SFO1 100.6228298 MHz

===== CHANNEL f2 =====  
 CPDPRG2 waltz16  
 NUC2 1H  
 PCPD2 90.00 usec  
 PL2 0.00 dB  
 PL12 15.66 dB  
 PL13 15.92 dB  
 PL2W 8.31434441 W  
 PL12W 0.22585411 W  
 PL13W 0.21272963 W  
 SFO2 400.1316005 MHz  
 SI 32768  
 SF 100.6127720 MHz  
 WDW EM  
 SSB 0  
 LB 1.00 Hz  
 GB 0  
 PC 1.40

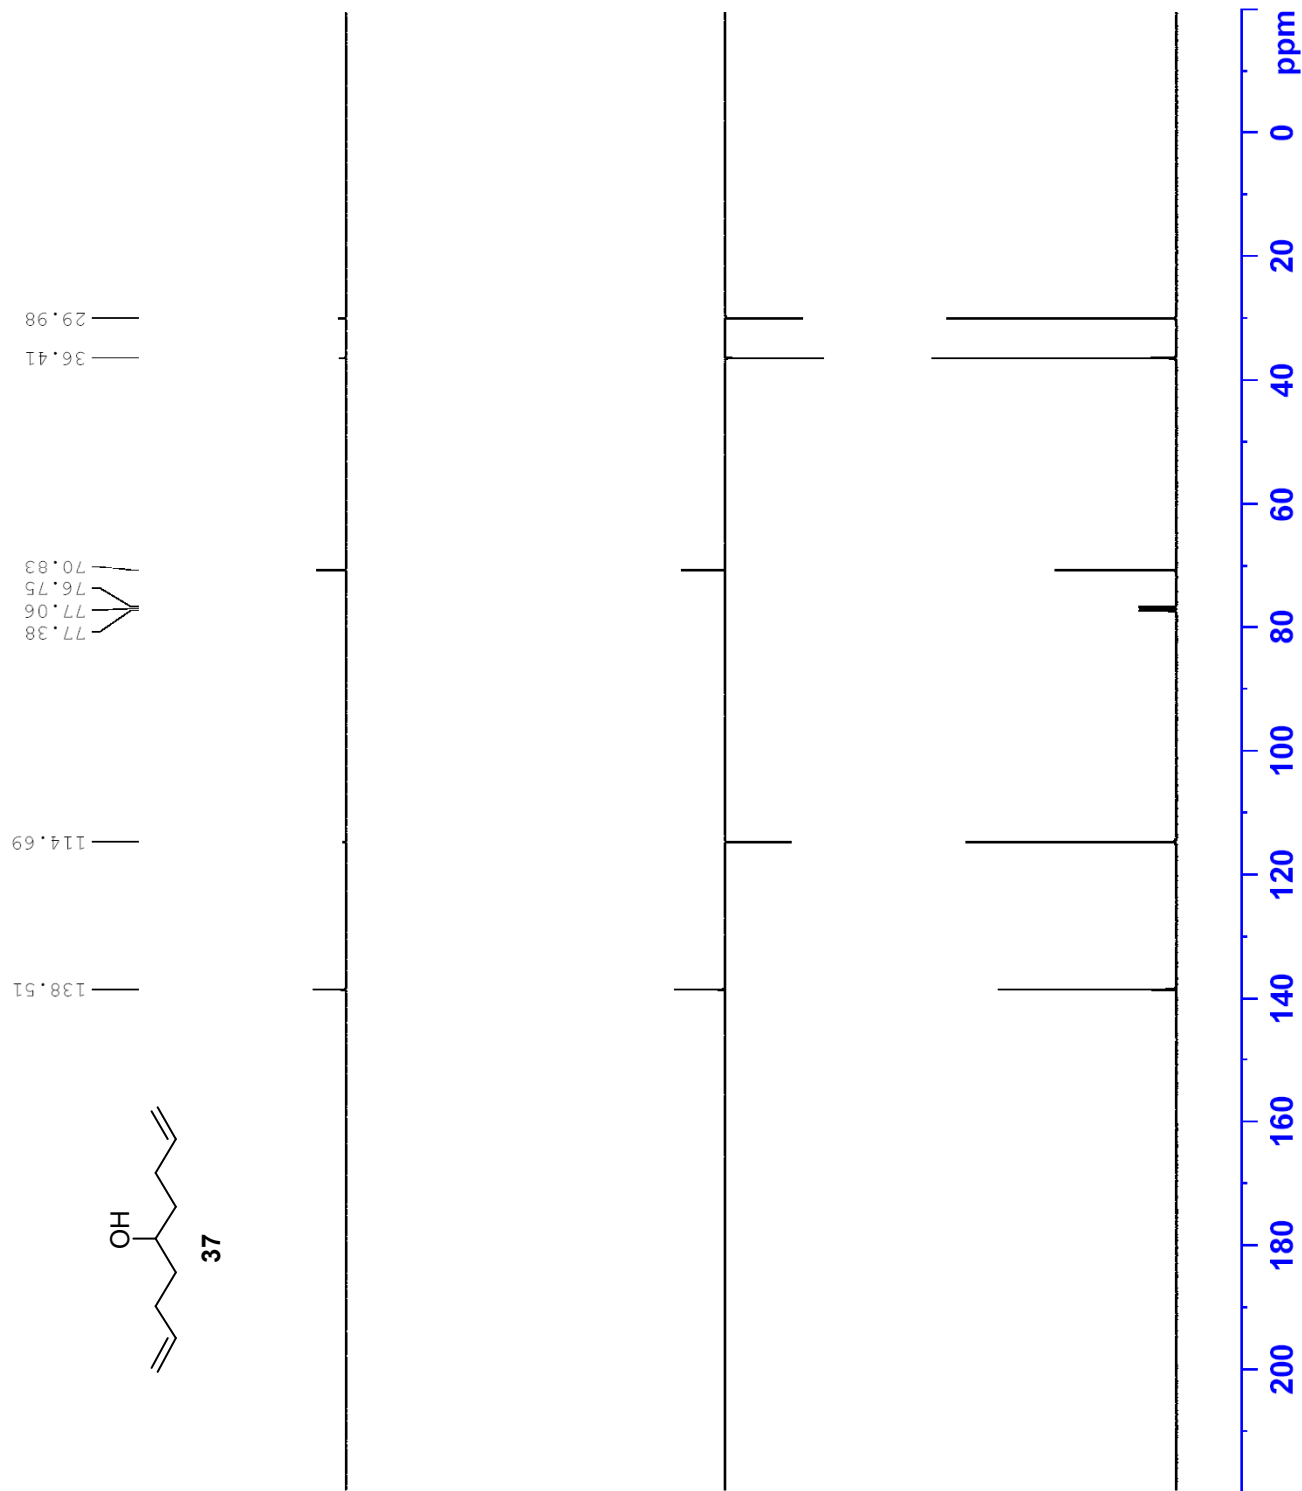

# <sup>1</sup>H NMR

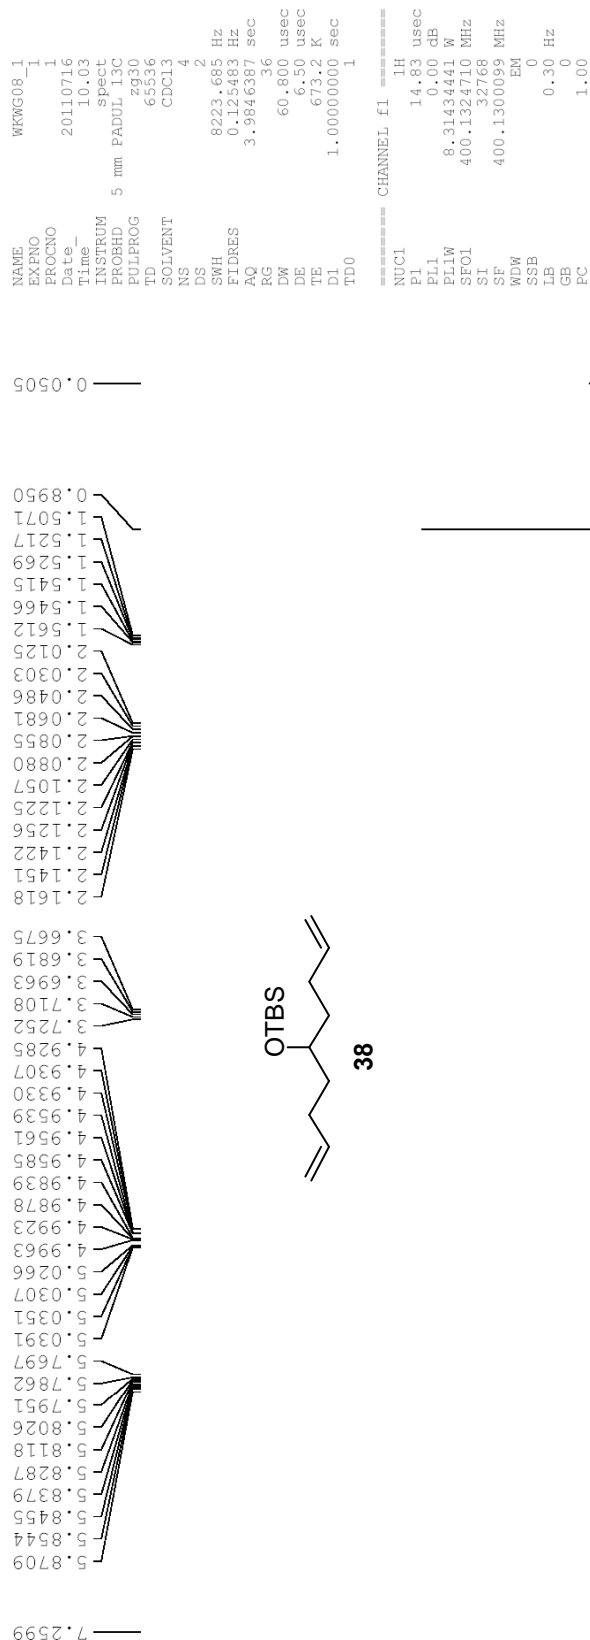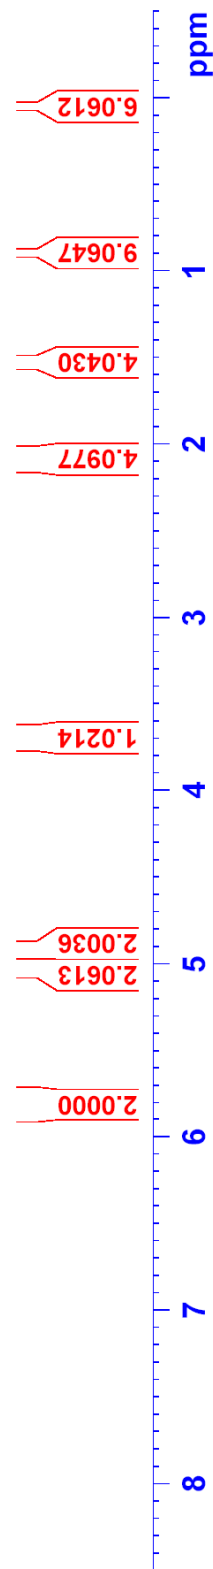

# <sup>13</sup>C NMR

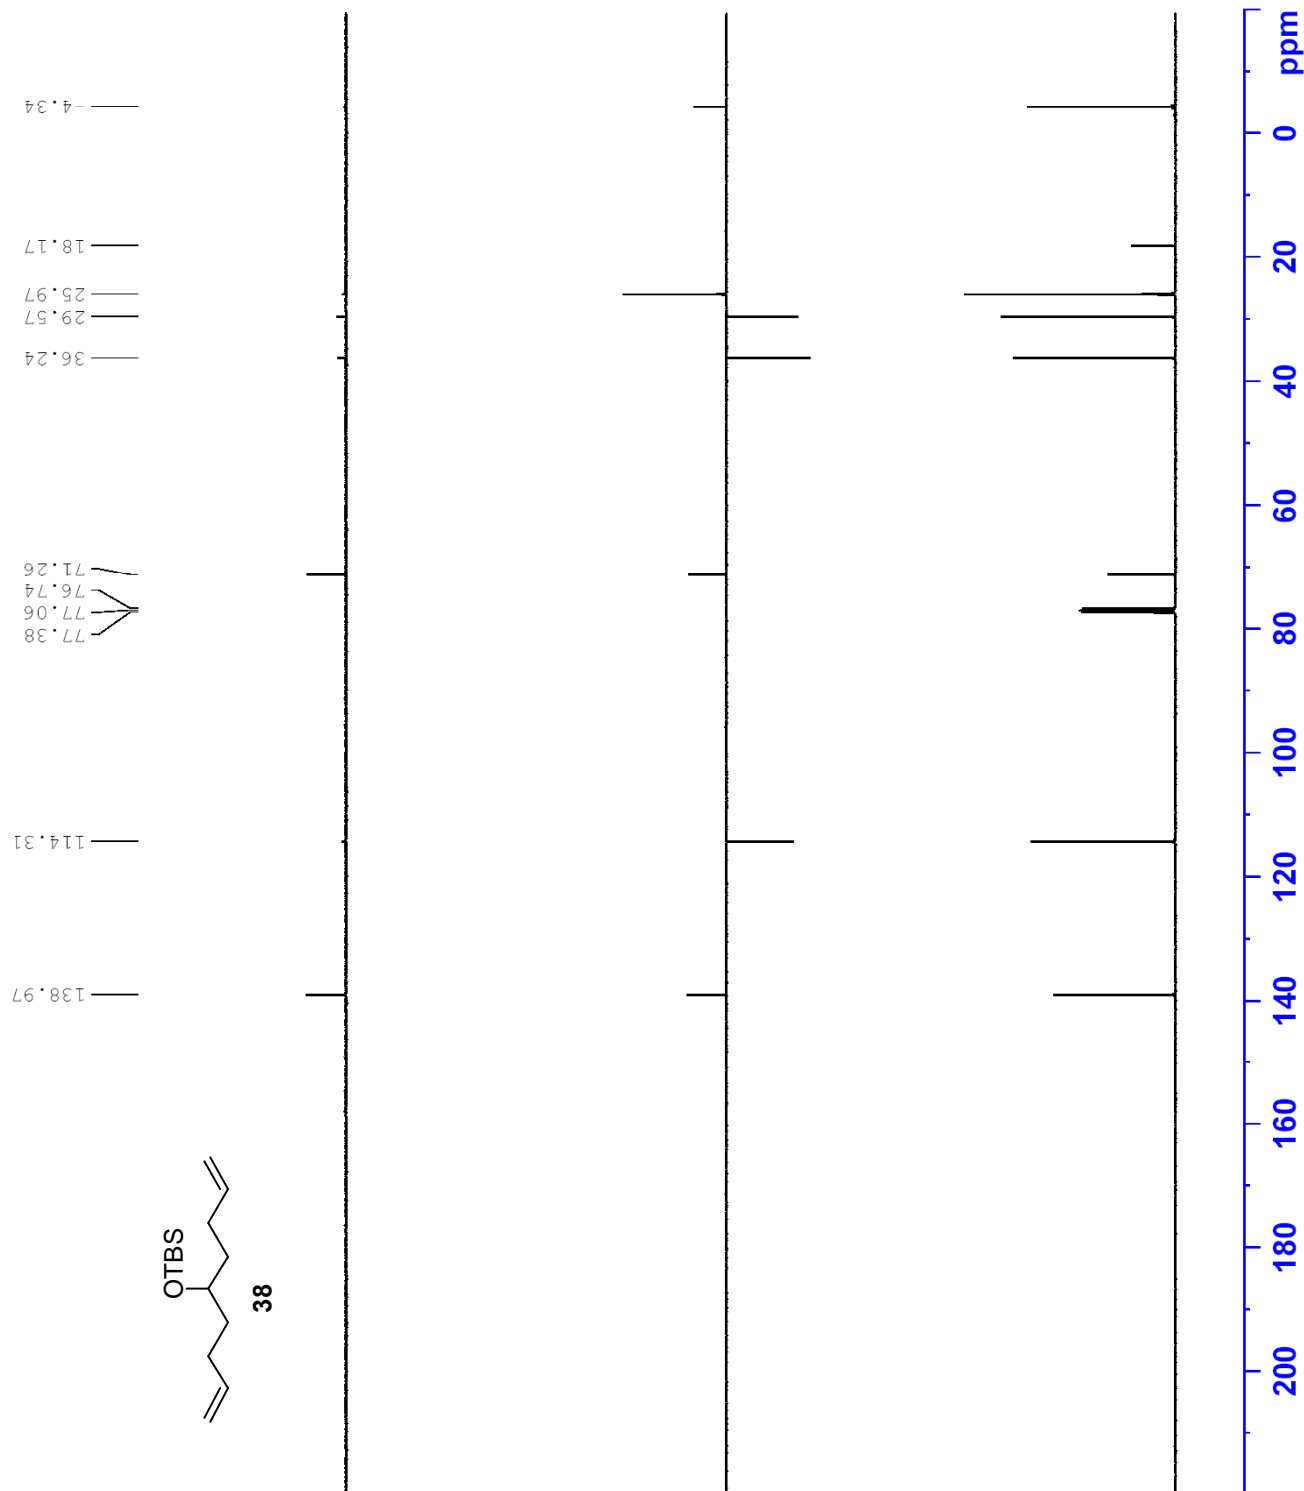

# <sup>1</sup>H NMR

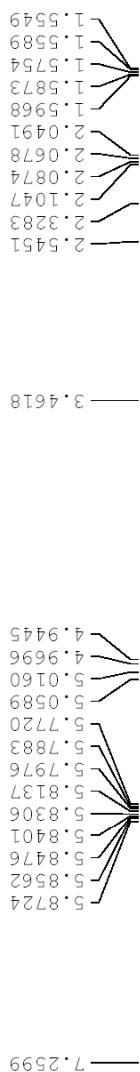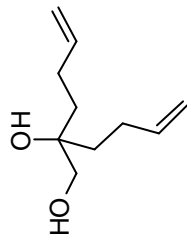

40

```

NAME          WKWF30
EXPNO         1
PROCNO        1
Date_         20110411
Time_         19.31
INSTRUM       spect
PROBHD        5 mm PADUL 13C
PULPROG       zg30
TD            65536
SOLVENT       CDCl3
NS            4
DS            2
SWH           8223.685 Hz
FIDRES        0.125403 Hz
AQ            3.9846387 sec
RG            71.8
DW            60.800 usec
DE            6.50 usec
TE            294.5 K
D1            1.00000000 sec
D0            1
===== CHANNEL f1 =====
NUC1          1H
P1            14.83 usec
PL1           0.00 dB
PL1W          8.31434441 W
SF01          400.1324710 MHz
SI            32768
SF            400.1300099 MHz
WDW           EM
SSB           0
LB            0.30 Hz
GB            0
PC            1.00
  
```

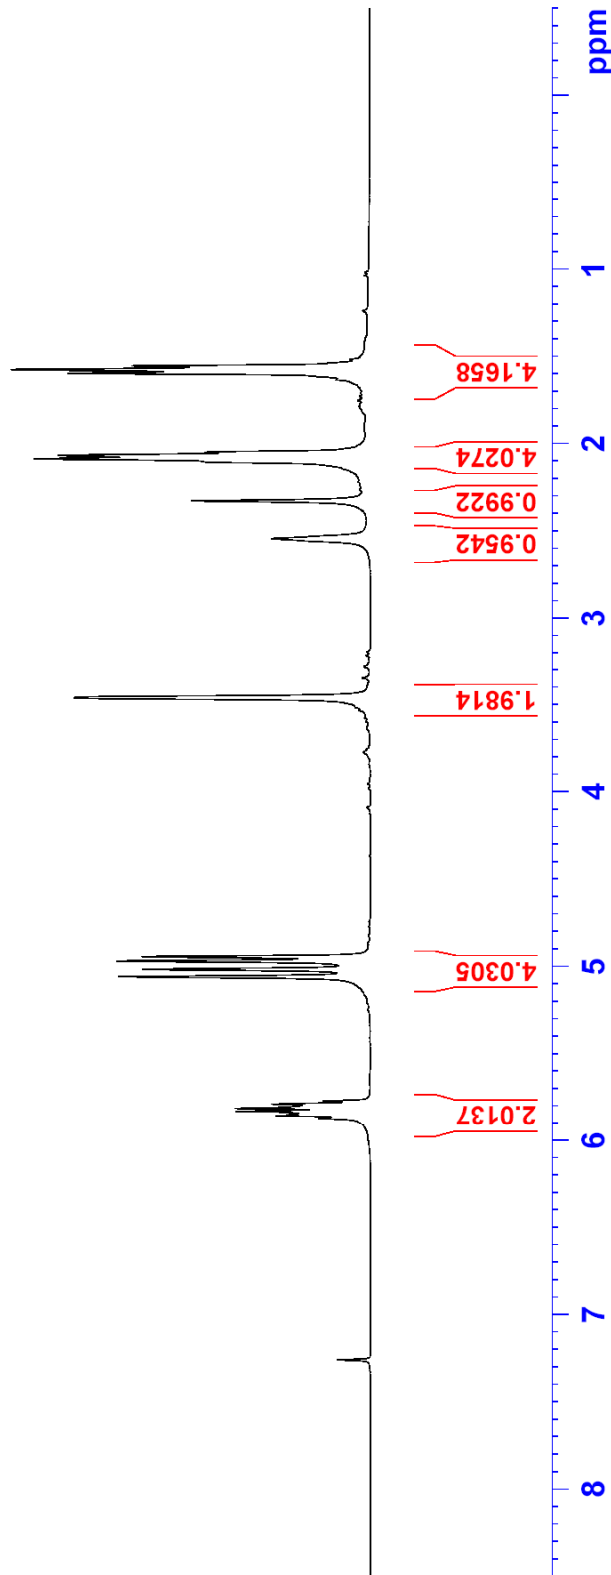



# <sup>13</sup>C NMR

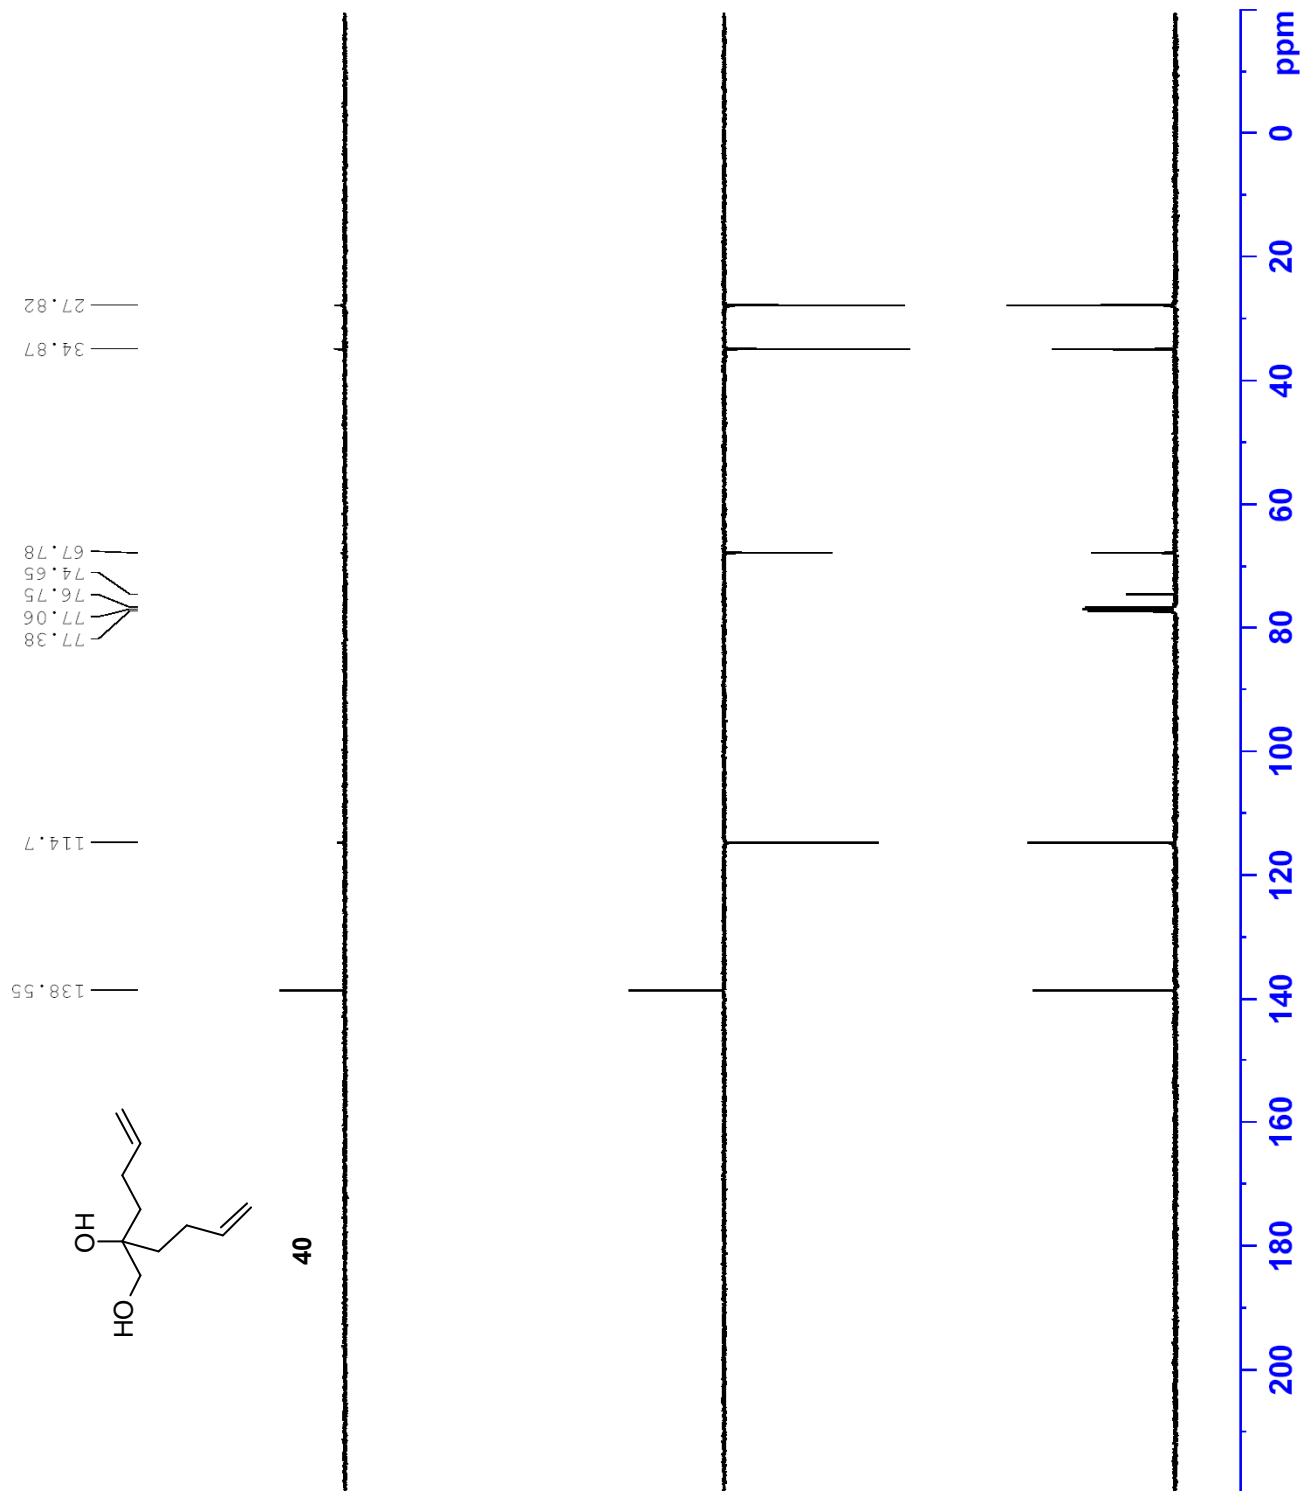

```

NAME WKWF30_c13
EXPNO 1
PROCNO 1
Date_ 20110411
Time_ 19.45
INSTRUM spect
PROBHD 5 mm PADUL 13C
PULPROG zgpg30
TD 65536
SOLVENT CDCl3
NS 76
DS 4
SWH 24038.461 Hz
FIDRES 0.366798 Hz
AQ 1.3631988 sec
RG 203
DW 20.800 usec
DE 6.50 usec
TE 294.7 K
D1 2.00000000 sec
D11 0.03000000 sec
TD0 1

===== CHANNEL f1 =====
NUC1 13C
P1 9.68 usec
PL1 -0.60 dB
PL1W 41.24164963 W
SFO1 100.6228298 MHz

===== CHANNEL f2 =====
CPDPRG2 waltz16
NUC2 1H
PCPD2 90.00 usec
PL2 0.00 dB
PL12 15.66 dB
PL13 15.92 dB
PL12W 8.31434441 W
PL13W 0.22585411 W
SFO2 400.1316005 MHz
SI 32768
SF 100.6127684 MHz
WDW EM
SSB 0
LB 1.00 Hz
GB 0
PC 1.40

```

<sup>1</sup>H NMR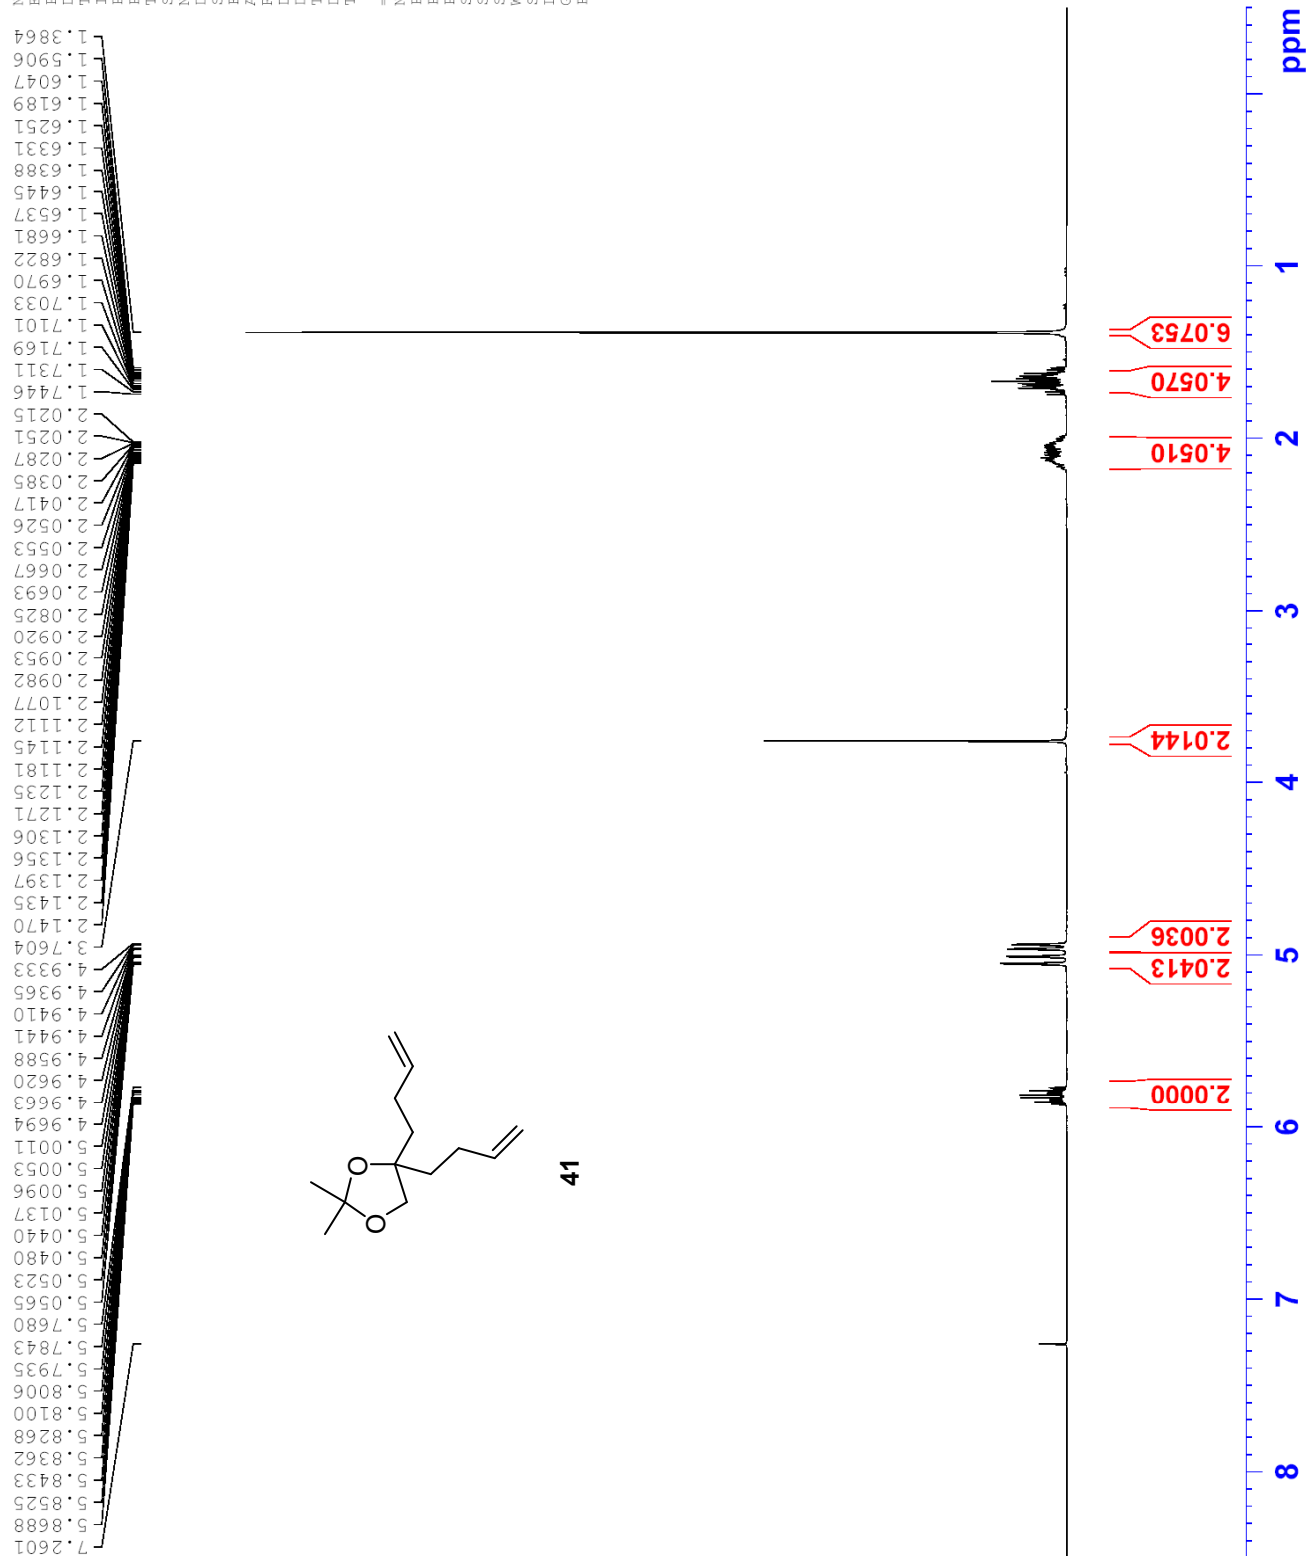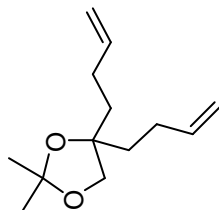

|                        |                 |
|------------------------|-----------------|
| NAME                   | WKFP31_c13_1    |
| EXPNO                  | 1               |
| PROCNO                 | 1               |
| Date_                  | 20110413        |
| Time_                  | 23.41           |
| INSTRUM                | spect           |
| PROBHD                 | 5 mm PADUL 13C  |
| PULPROG                | zgpg30          |
| TD                     | 65536           |
| SOLVENT                | CDC13           |
| DOS                    | 1373            |
| NS                     | 4               |
| DS                     | 24038.461 Hz    |
| SWH                    | 0.366798 Hz     |
| FIDRES                 | 1.363198 sec    |
| AQ                     | 203             |
| RG                     | 20              |
| DW                     | 20.800 usec     |
| DE                     | 6.50 usec       |
| TE                     | 295.2 K         |
| D1                     | 2.0000000 sec   |
| D11                    | 0.03000000 sec  |
| TD0                    | 1               |
| ===== CHANNEL f1 ===== |                 |
| NUC1                   | 13C             |
| P1                     | 9.68 usec       |
| PL1                    | -0.60 dB        |
| PL1W                   | 41.24164963 W   |
| SFO1                   | 100.6228238 MHz |
| ===== CHANNEL f2 ===== |                 |
| CPDPRG2                | waltz16         |
| NUC2                   | 1H              |
| PCPDF2                 | 90.00 usec      |
| PL2                    | 0.00 dB         |
| PL12                   | 15.66 dB        |
| PL13                   | 15.92 dB        |
| PL2W                   | 8.31434441 W    |
| PL12W                  | 0.2285411 W     |
| PL13W                  | 0.21272963 W    |
| SFO2                   | 400.1316005 MHz |
| SI                     | 32768           |
| SSF                    | 100.6127654 MHz |
| WDW                    | EM              |
| SGB                    | 0               |
| LB                     | 1.00 Hz         |
| GB                     | 0               |
| PC                     | 1.40            |

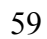

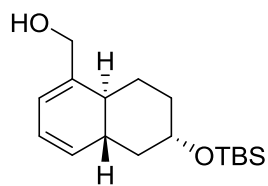

**30**

**HPLC-Condition: Column:** Chiralcel OD-H, Chiral Technologies, Inc.

**Eluent:** Hexane/2-propanol (99/1); **Flow rate:** 0.70 ml/min;

**Detection:** UV 254nm

### Racemic cycloadduct

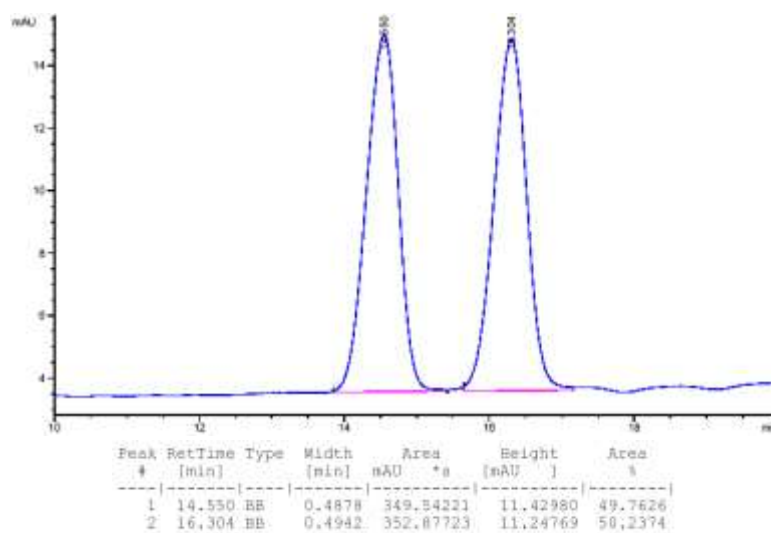

### Chiral cycloadduct

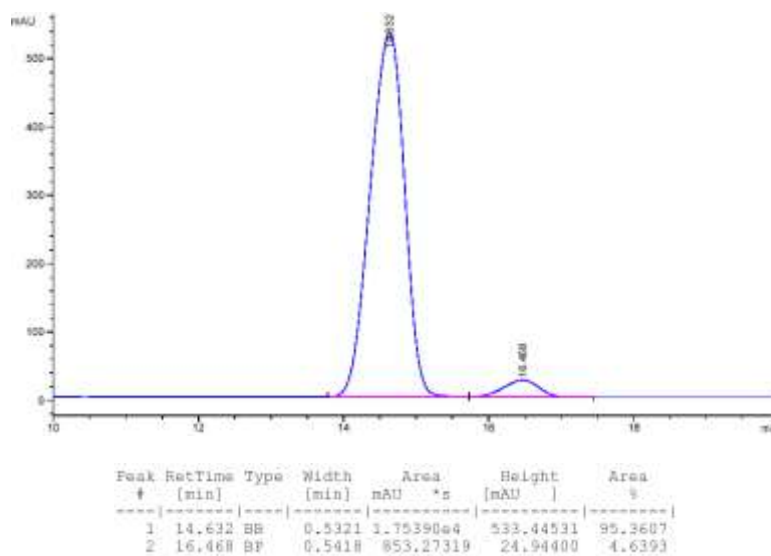

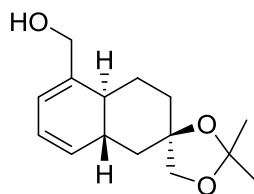

33

**HPLC-Condition: Column:** Chiralcel OD-H, Chiral Technologies, Inc.

**Eluent:** Hexane/2-propanol (99/1); **Flow rate:** 0.70 ml/min;

**Detection:** UV 254nm

**Racemic cycloadduct**

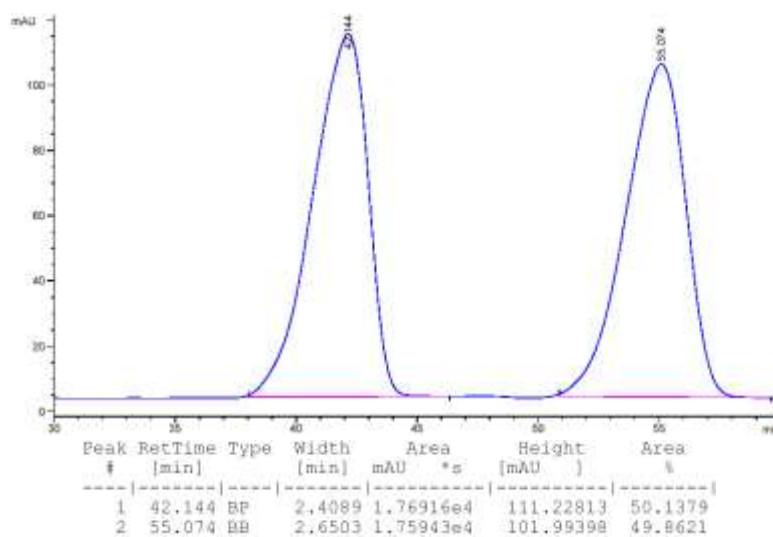

**Chiral cycloadduct**

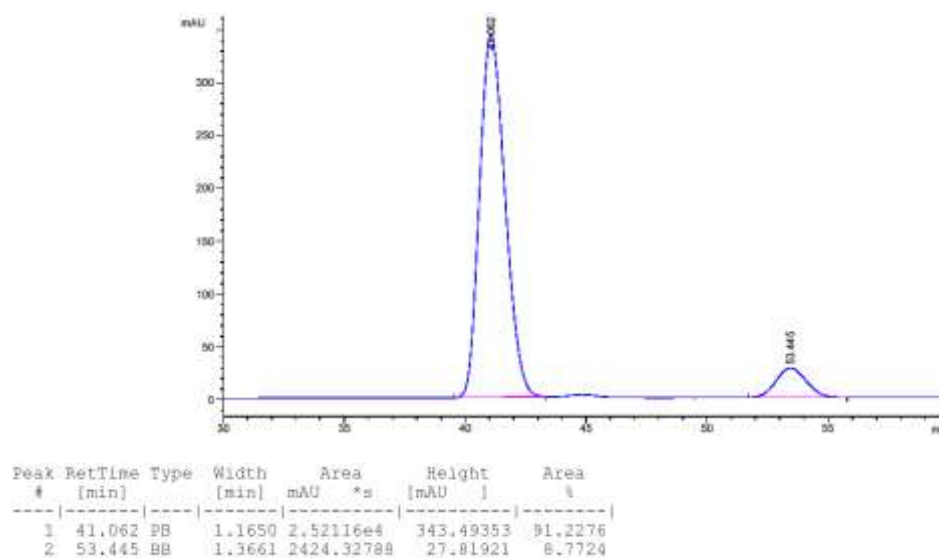

Supplement: c4ob02219j1.pdf [file c4ob02219j1.pdf]
